# Supplementary material
Source: PubMed Central journal article supplement (PMC2613785)
Supplement: NIHMS63796-supplement-1si20060315_06.pdf [file NIHMS63796-supplement-1si20060315_06.pdf]

## **A Concise Stereoselective Synthesis of Preussin, 3-*epi*-Preussin, and Analogs**

**Myra Beaudoin Bertrand and John P. Wolfe\***

*Department of Chemistry, University of Michigan, 930 N. University Ave., Ann Arbor, Michigan, 48109-1055*

### **Supporting Information (continued).**

**<sup>1</sup>H and <sup>13</sup>C NMR spectra for compounds in Schemes 2-4 and Tables 1-2**

Standard proton

```

Pulse Sequence: s2pu1
Solvent: CDCl3
Ambient temperature
File: mbb-6-43-HMR
INOVA-500 "H1"
PULSE SEQUENCE
Relax delay 0.500 sec
Pulse 45.0 degrees
Acq. time 3.000 sec
Width 7998.4 Hz
16 repetitions
RESERVE H1, 489.9042605 MHZ
DATA PROCESSING
Line broadening 0.2 Hz
F size 65536
Total time 1 min, 3 sec

```

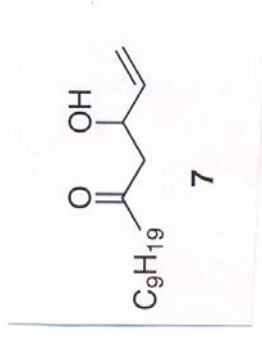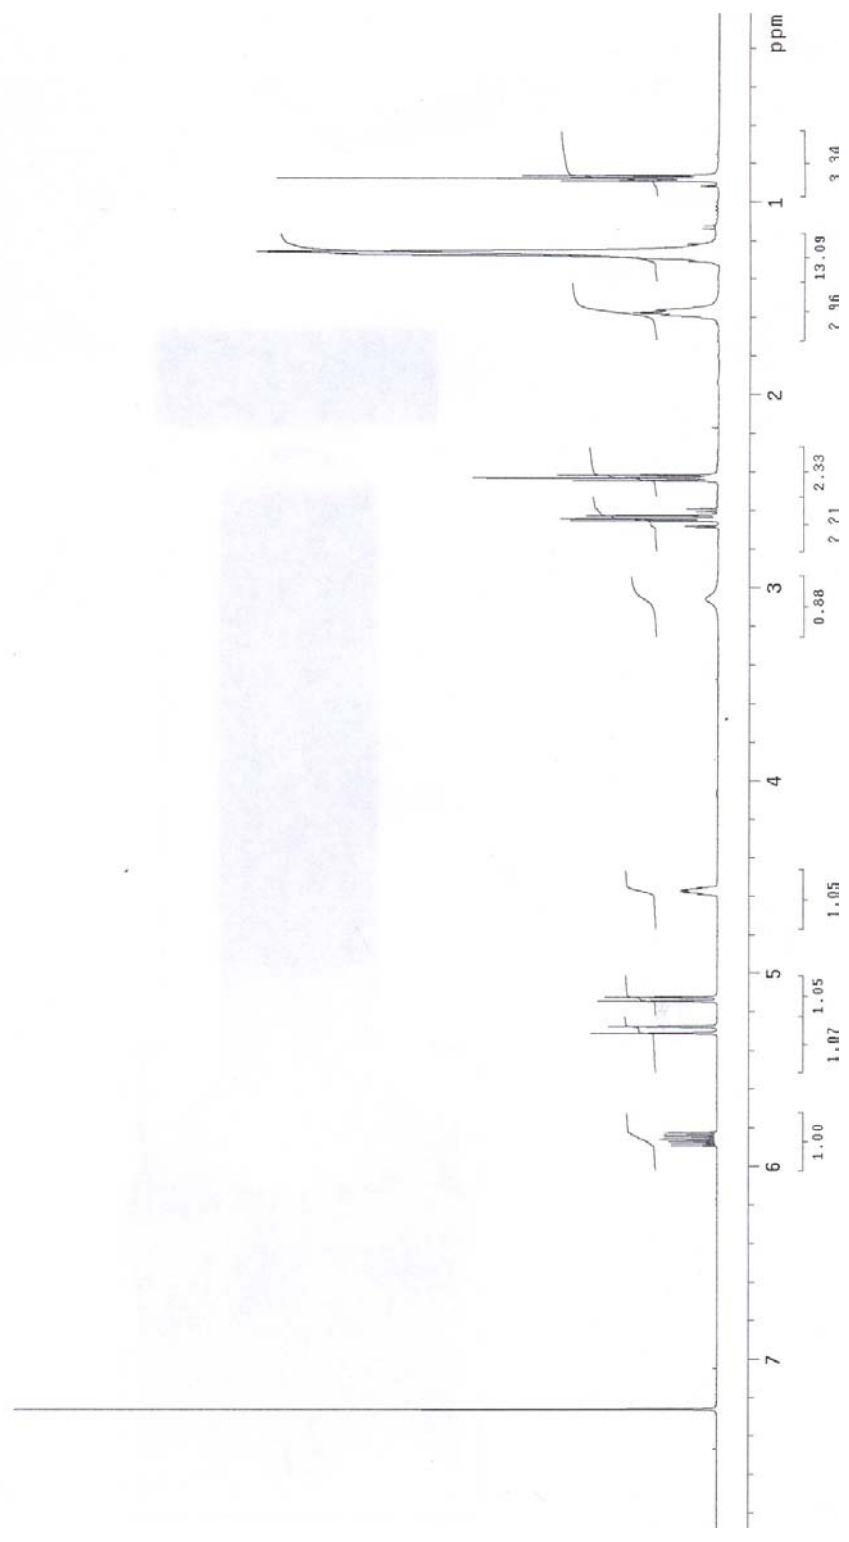

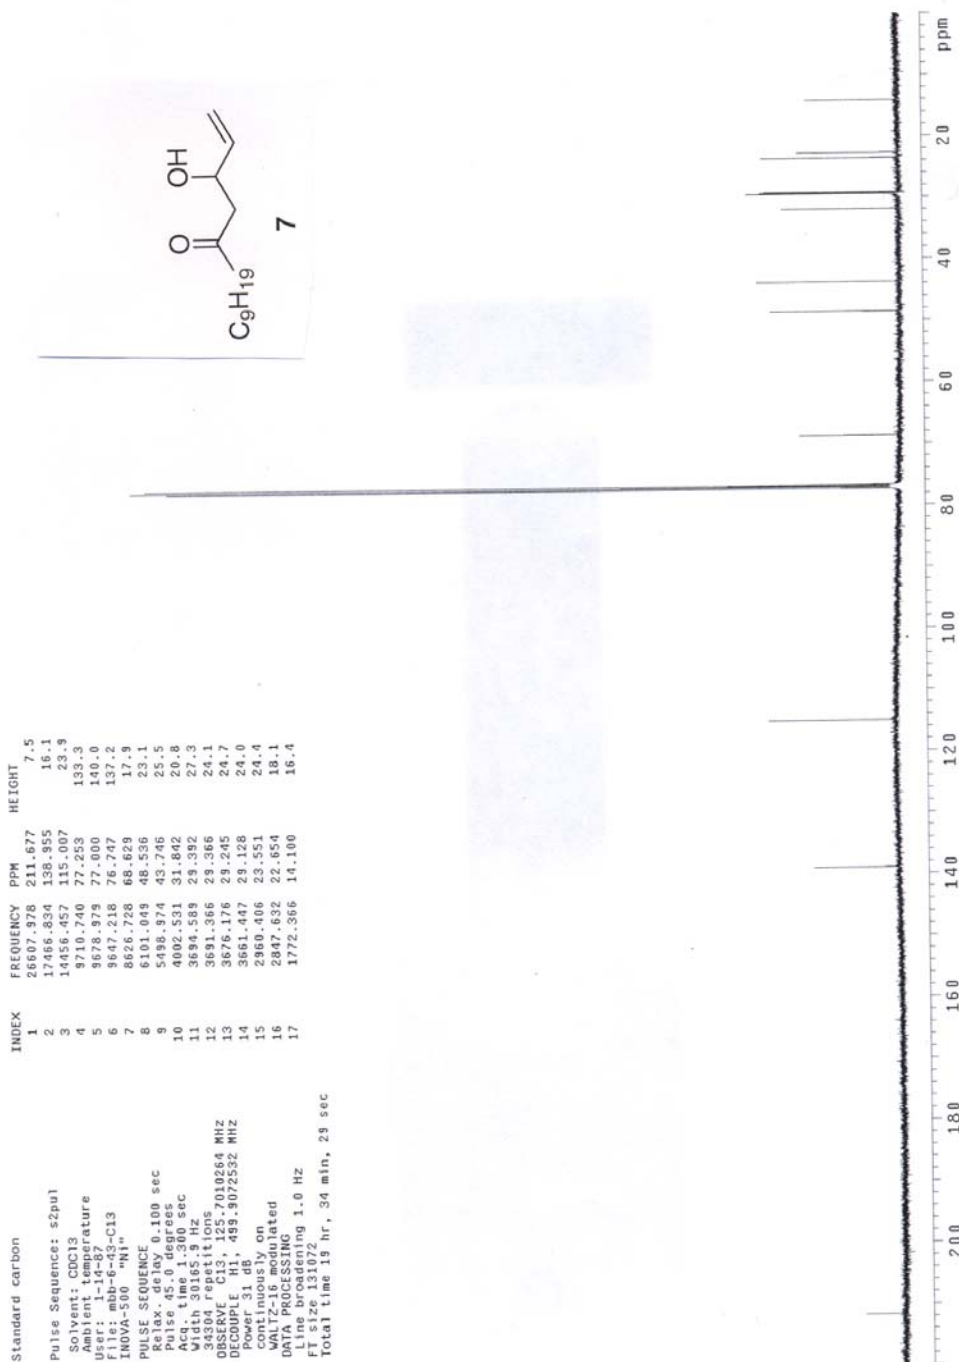

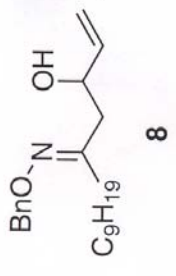

Standard proton  
 Pulse Sequence: s2pu1  
 Solvent: CDCl3  
 Ambient temperature  
 File: mbb-4-184-HMR  
 INOVA-500 "H1"  
 PULSE SEQUENCE  
 Relax. delay 0.500 sec  
 Pulse 45.0 degrees  
 Acq. time 3.000 sec  
 Width 7998.4 Hz  
 Frequency 499.9042603 MHz  
 OBSERVE H1  
 DATA PROCESSING 0.2 Hz  
 Line broadening 0.2 Hz  
 FT size 65536  
 Total time 1 min, 3 sec

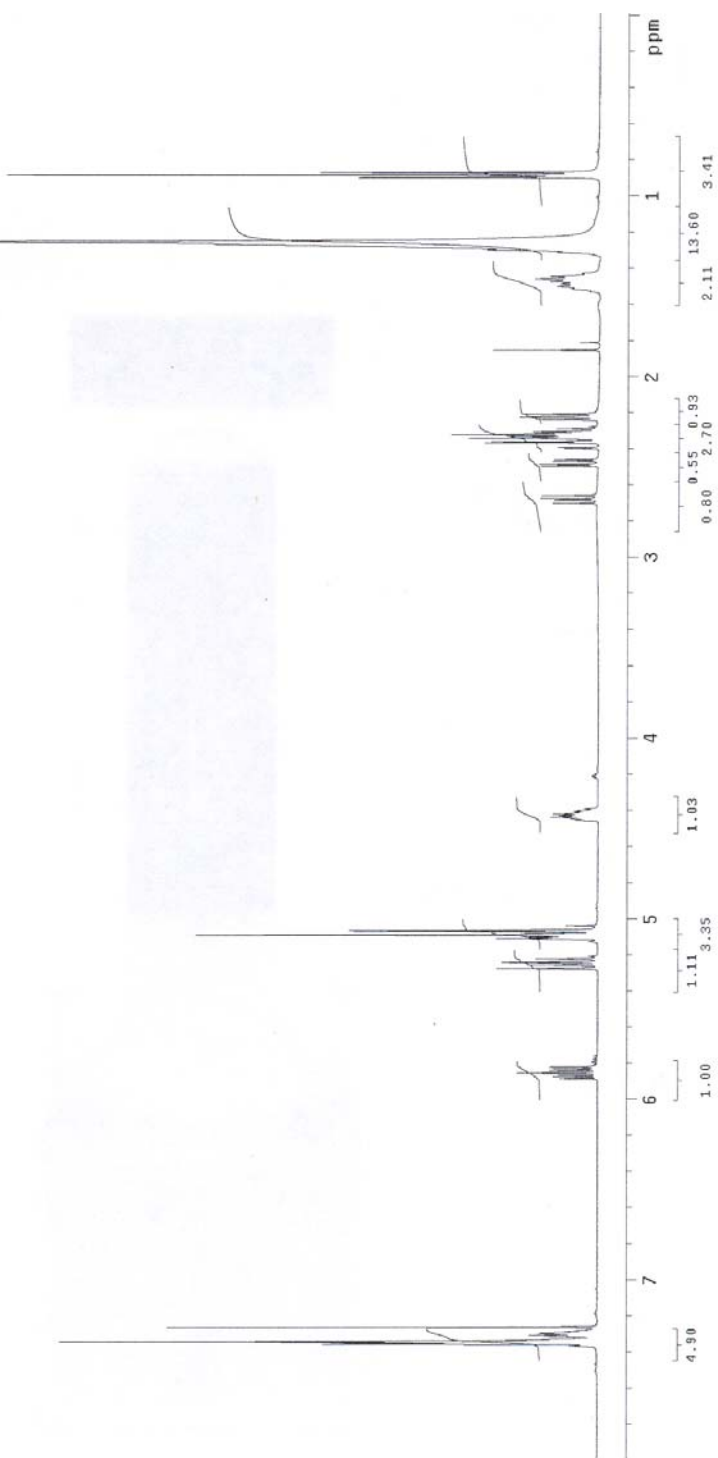

## Standard carbon

Pulse Sequence: s2pu1

Solvent: CDCl3

Ambient temperature

User: 1-14-87

File: mdb-7-164-C13

INNOVA-500 "N14"

PULSE SEQUENCE

Relax. delay 0.100 sec

Pulse 45.0 degrees

Acq. time 1.300 sec

Width 30165.9 Hz

2880 repetitions

OBSERVE C13, 125.7010273 MHz

DECOUPLE H1, 499.9072532 MHz

Power 31 dB

continuously on

WALTZ-16 modulated

DATA PROCESSING

Line broadening 1.0 Hz

FT size 131072

Total time 19 hr, 34 min, 29 sec

| INDEX | FREQUENCY PPM | HEIGHT  |
|-------|---------------|---------|
| 1     | 20183.078     | 160.564 |
| 2     | 20013.226     | 159.213 |
| 3     | 17641.289     | 140.343 |
| 4     | 17531.276     | 138.468 |
| 5     | 17345.314     | 137.889 |
| 6     | 17302.046     | 137.644 |
| 7     | 16137.941     | 128.384 |
| 8     | 16136.560     | 128.373 |
| 9     | 16107.101     | 128.138 |
| 10    | 16097.435     | 128.061 |
| 11    | 16066.584     | 127.816 |
| 12    | 16062.912     | 127.787 |
| 13    | 14424.256     | 114.750 |
| 14    | 14417.791     | 114.699 |
| 15    | 9710.740      | 77.253  |
| 16    | 9678.979      | 77.000  |
| 17    | 9646.758      | 76.744  |
| 18    | 9513.731      | 75.685  |
| 19    | 9508.667      | 75.645  |
| 20    | 8885.878      | 70.691  |
| 21    | 8717.868      | 69.354  |
| 22    | 5150.065      | 40.971  |
| 23    | 4582.972      | 36.459  |
| 24    | 4438.437      | 35.309  |
| 25    | 4004.372      | 31.856  |
| 26    | 3720.826      | 29.601  |
| 27    | 3712.540      | 29.535  |
| 28    | 3706.096      | 29.483  |
| 29    | 3688.731      | 29.425  |
| 30    | 3690.446      | 29.359  |
| 31    | 3684.462      | 29.311  |
| 32    | 3679.399      | 29.271  |
| 33    | 3673.875      | 29.227  |
| 34    | 3304.713      | 26.290  |
| 35    | 3211.271      | 25.547  |
| 36    | 2848.093      | 22.658  |
| 37    | 1773.287      | 14.107  |

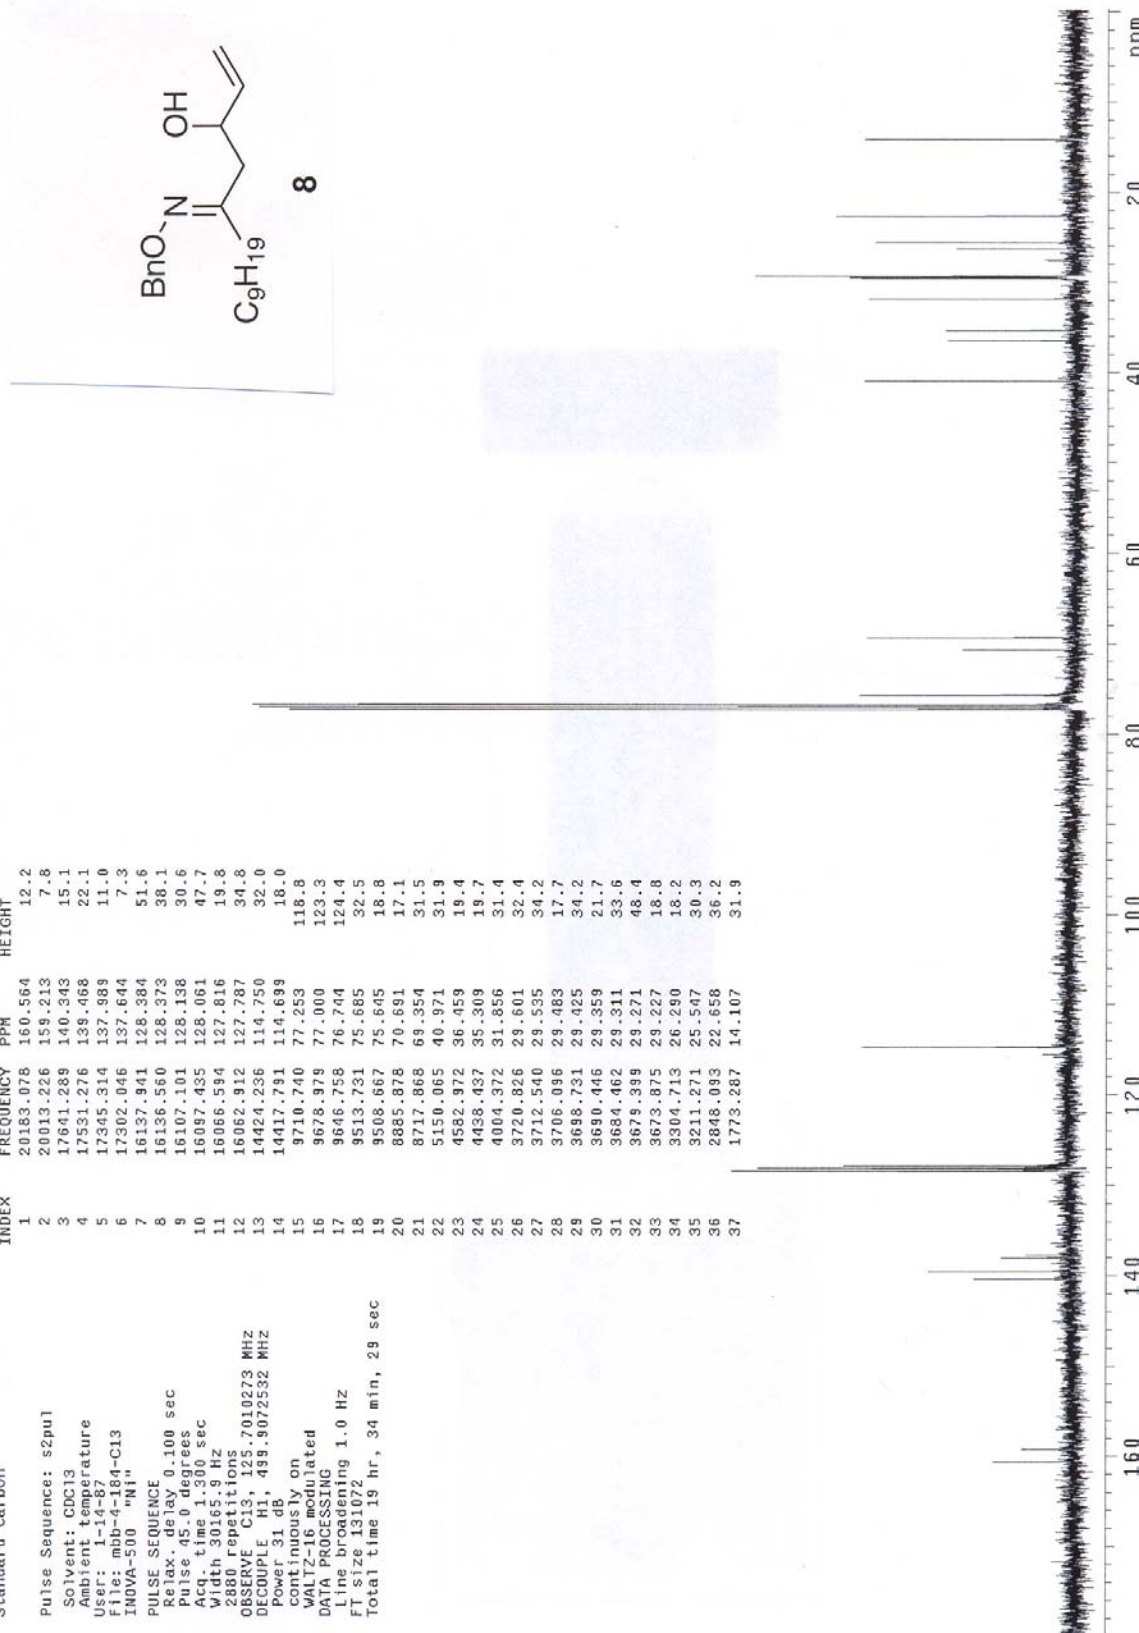

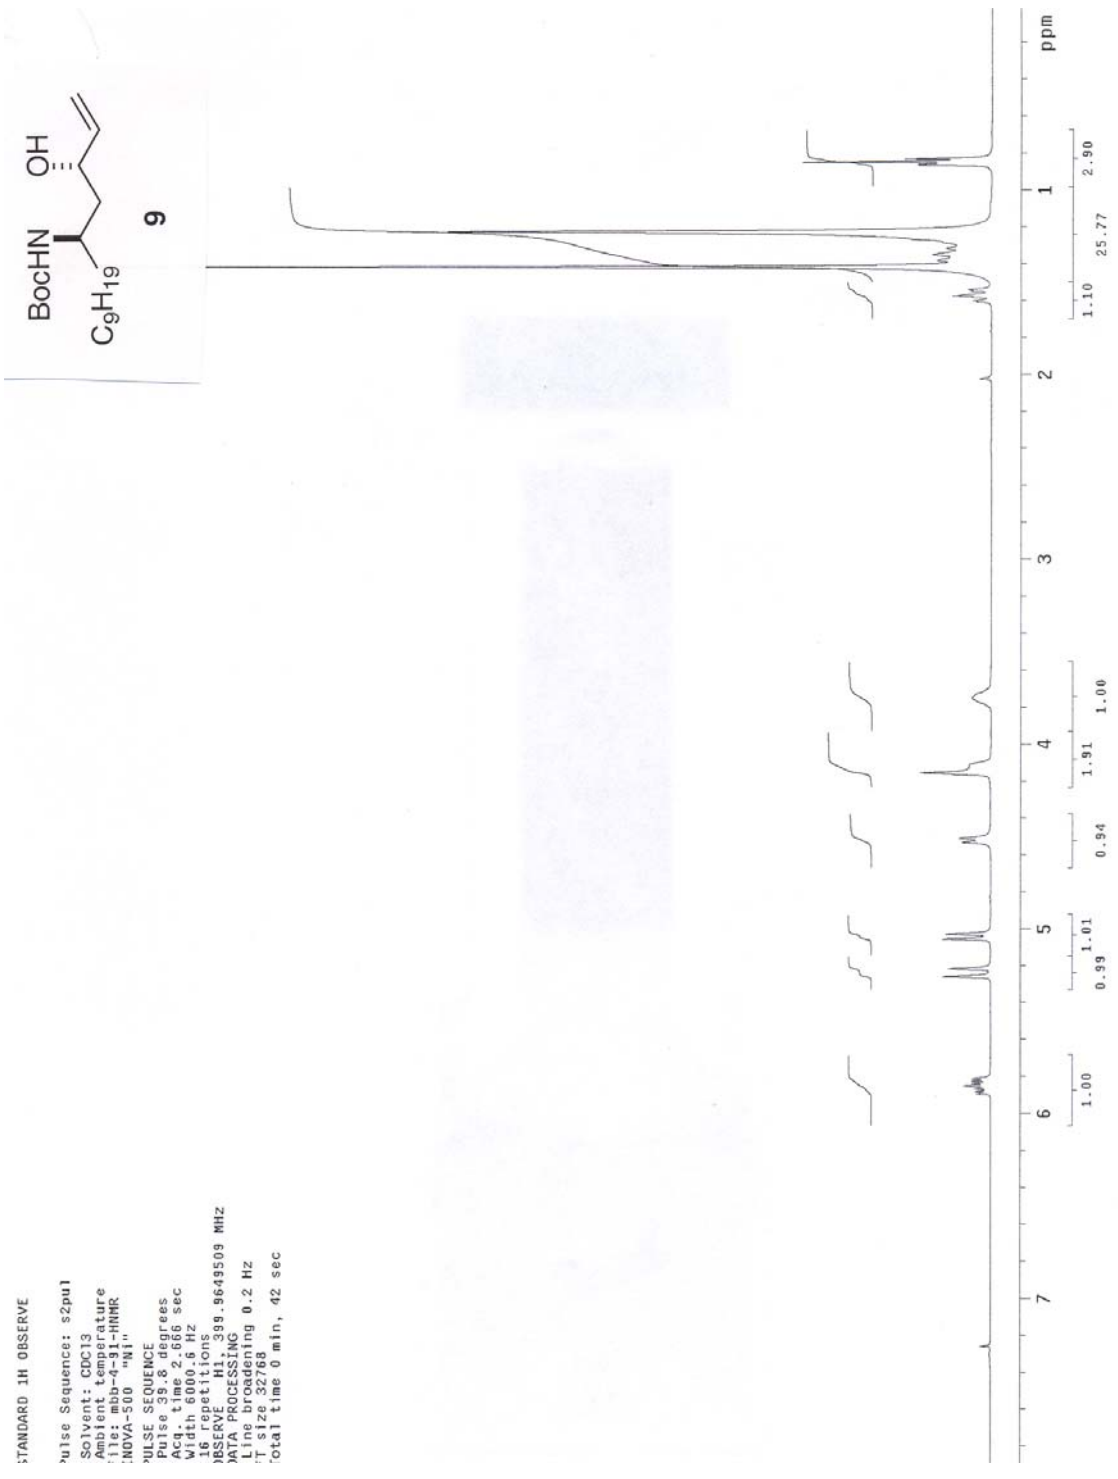

## 13C OBSERVE

Pulse Sequence: s2pul  
 Solvent: CDCl3  
 Ambient temperature  
 F1: bh-41 CDCl3  
 INOVA-500 "N1"

PULSE SEQUENCE  
 Relax. delay 0.900 sec  
 Pulse 99.5 degrees  
 Acq. time 1.199 sec  
 Width 25000.0 Hz  
 176 repetitions

OBSERVE C13, 100.5712713 MHz  
 DECOUPLE H1, 399.9669644 MHz  
 Power 38 dB  
 continuously on

WALTZ-16 modulated

DATA PROCESSING

Line broadening 1.0 Hz

FT size 65536

Total time 29 hr, 16 min, 50 sec

| INDEX | FREQUENCY PPM | HEIGHT  |
|-------|---------------|---------|
| 1     | 15811.556     | 157.217 |
| 2     | 14110.149     | 140.300 |
| 3     | 11423.757     | 113.589 |
| 4     | 8020.943      | 79.754  |
| 5     | 7776.032      | 77.319  |
| 6     | 7743.988      | 77.000  |
| 7     | 7711.943      | 76.681  |
| 8     | 6881.077      | 68.420  |
| 9     | 4770.722      | 47.436  |
| 10    | 4444.174      | 44.189  |
| 11    | 3578.211      | 35.579  |
| 12    | 3197.493      | 31.793  |
| 13    | 2961.737      | 29.449  |
| 14    | 2960.212      | 29.434  |
| 15    | 2948.004      | 29.313  |
| 16    | 2937.323      | 29.206  |
| 17    | 2843.478      | 28.273  |
| 18    | 2622.982      | 26.061  |
| 19    | 2271.256      | 22.584  |
| 20    | 1410.634      | 14.026  |

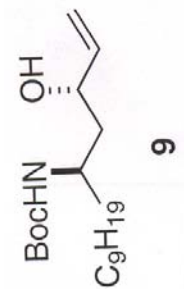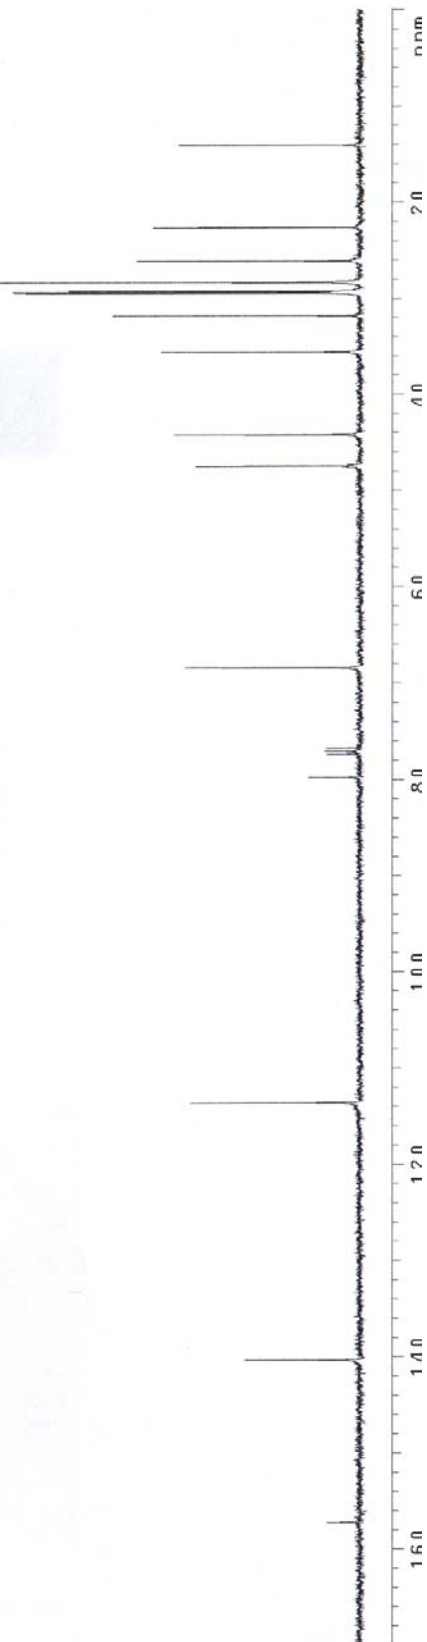

## STANDARD 1H OBSERVE

ulse Sequence: s2pul  
 Solvent: CDCl3  
 Ambient temperature  
 file: mbb-4-153-HNMR  
 NOVA-500 "N1"  
 ULSE SEQUENCE  
 Pulse 39.8 degrees  
 Acq. time 2.666 sec  
 Width 6000.6 Hz  
 18 repetitions  
 ASKRY  
 FREQ: 399.9649198 MHz  
 APT: 1000000000  
 Line broadening 0.2 Hz  
 T size: 32768  
 total time 0 min, 42 sec

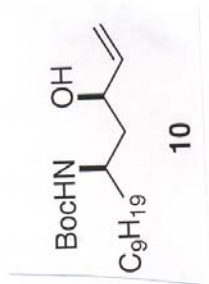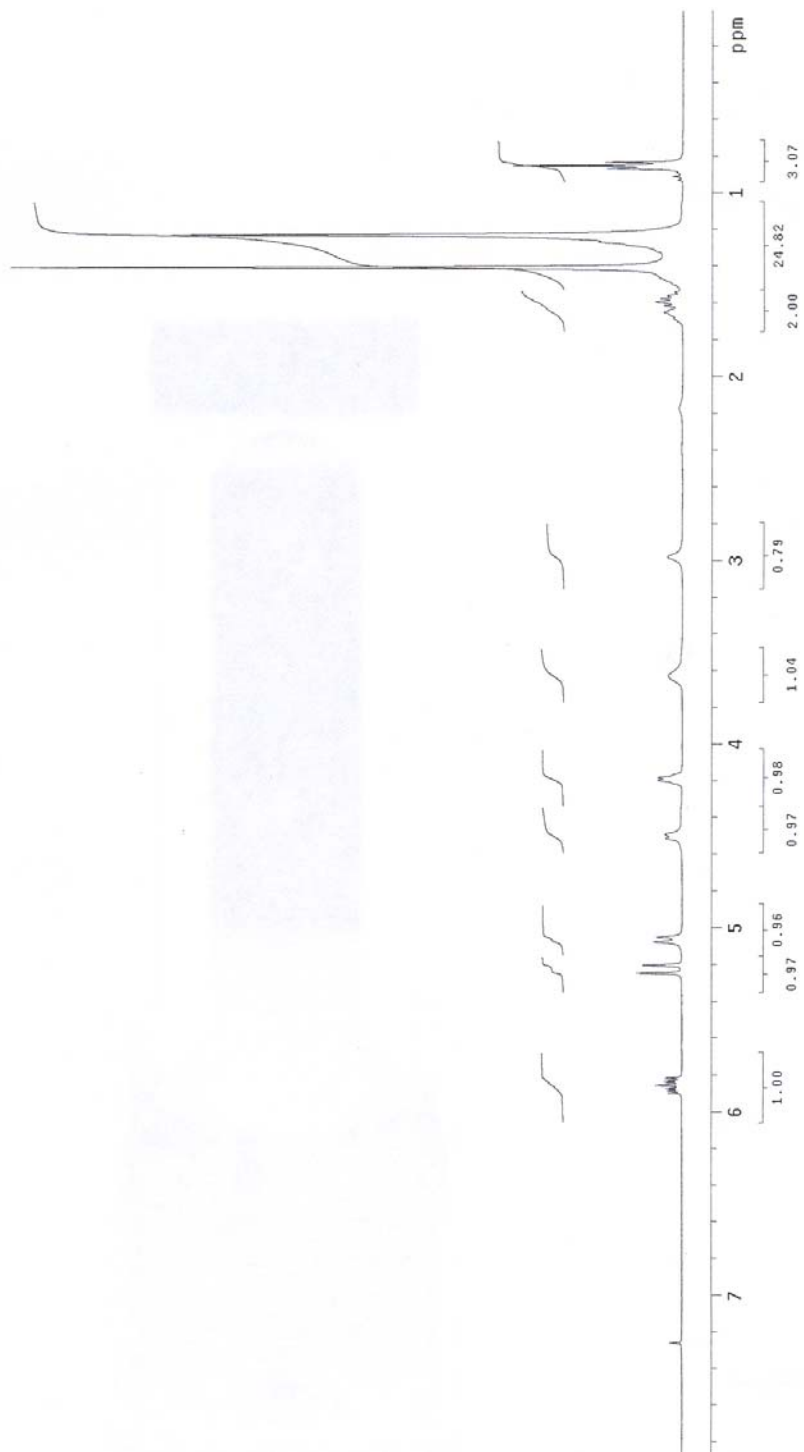



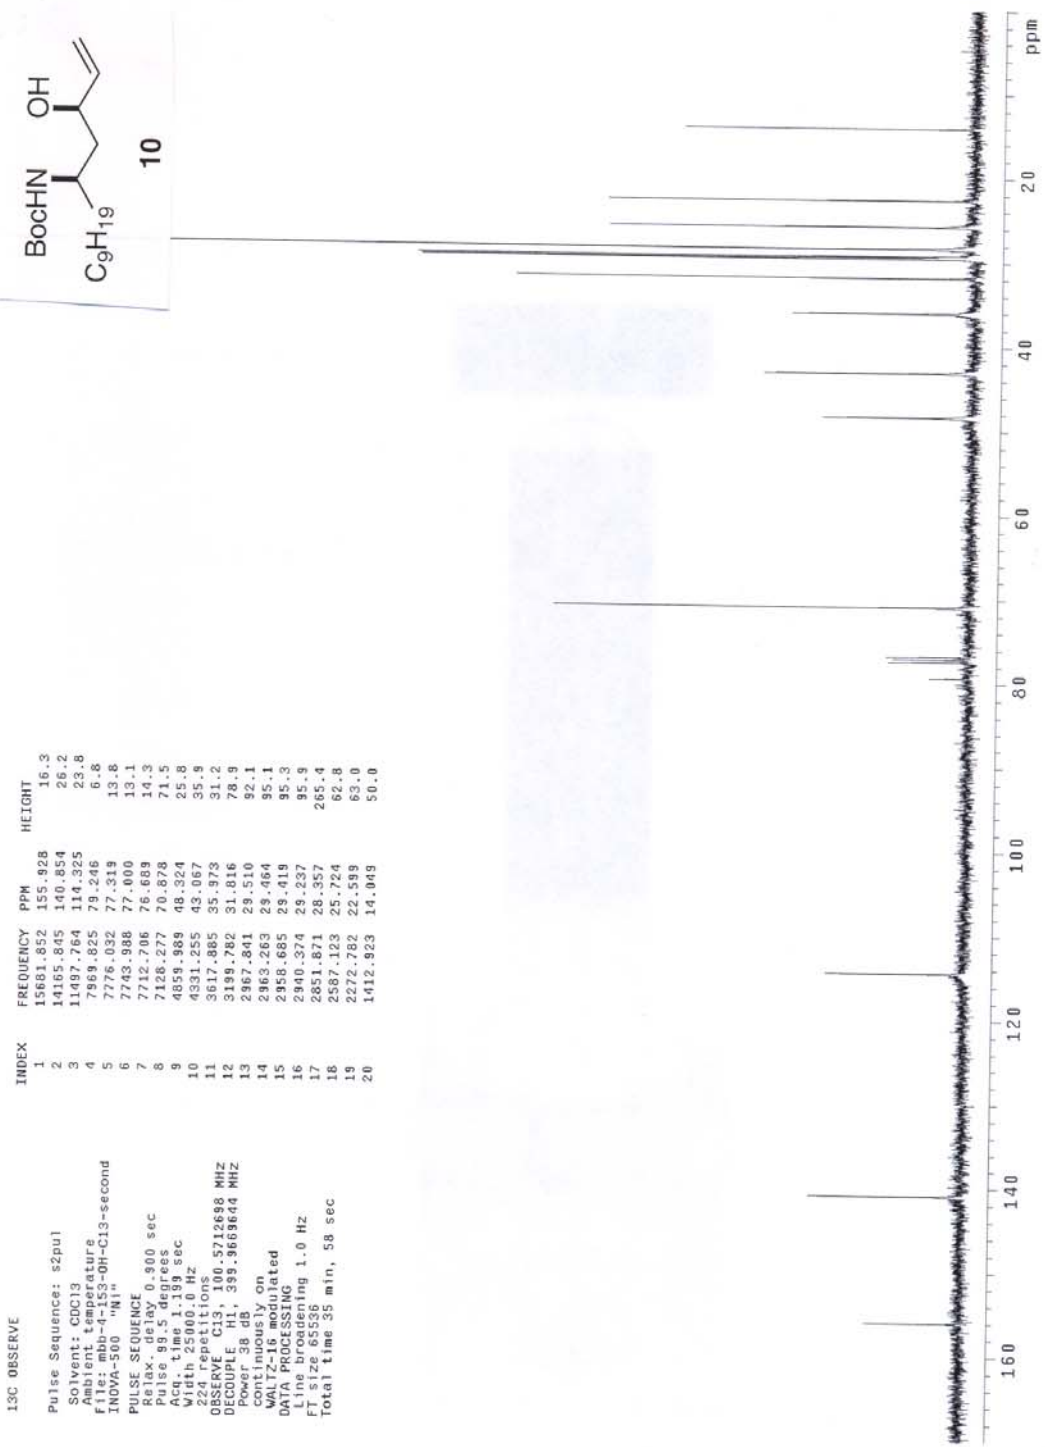

13C OBSERVE

Pulse Sequence: s2pul  
 Solvent: CDCl3  
 Ambient temperature  
 IN: mbp-4-153-OH-C13-second  
 INVA-300 MHz  
 PULSE SEQUENCE  
 Pulz: 89.100 sec  
 Pulz: 89.100 sec  
 Acc: time 1.189 sec  
 Width 25000.0 Hz  
 224 repetitions  
 OBSERVE C13, 100.5712658 MHz  
 DECOUPLE H1, 399.3669644 MHz  
 Over 38 scans  
 Cont: 100.000 on  
 WAIT-18 modulated  
 DATA PROCESSING  
 Line broadening 1.0 Hz  
 FT size 65536  
 Total time 35 min, 58 sec

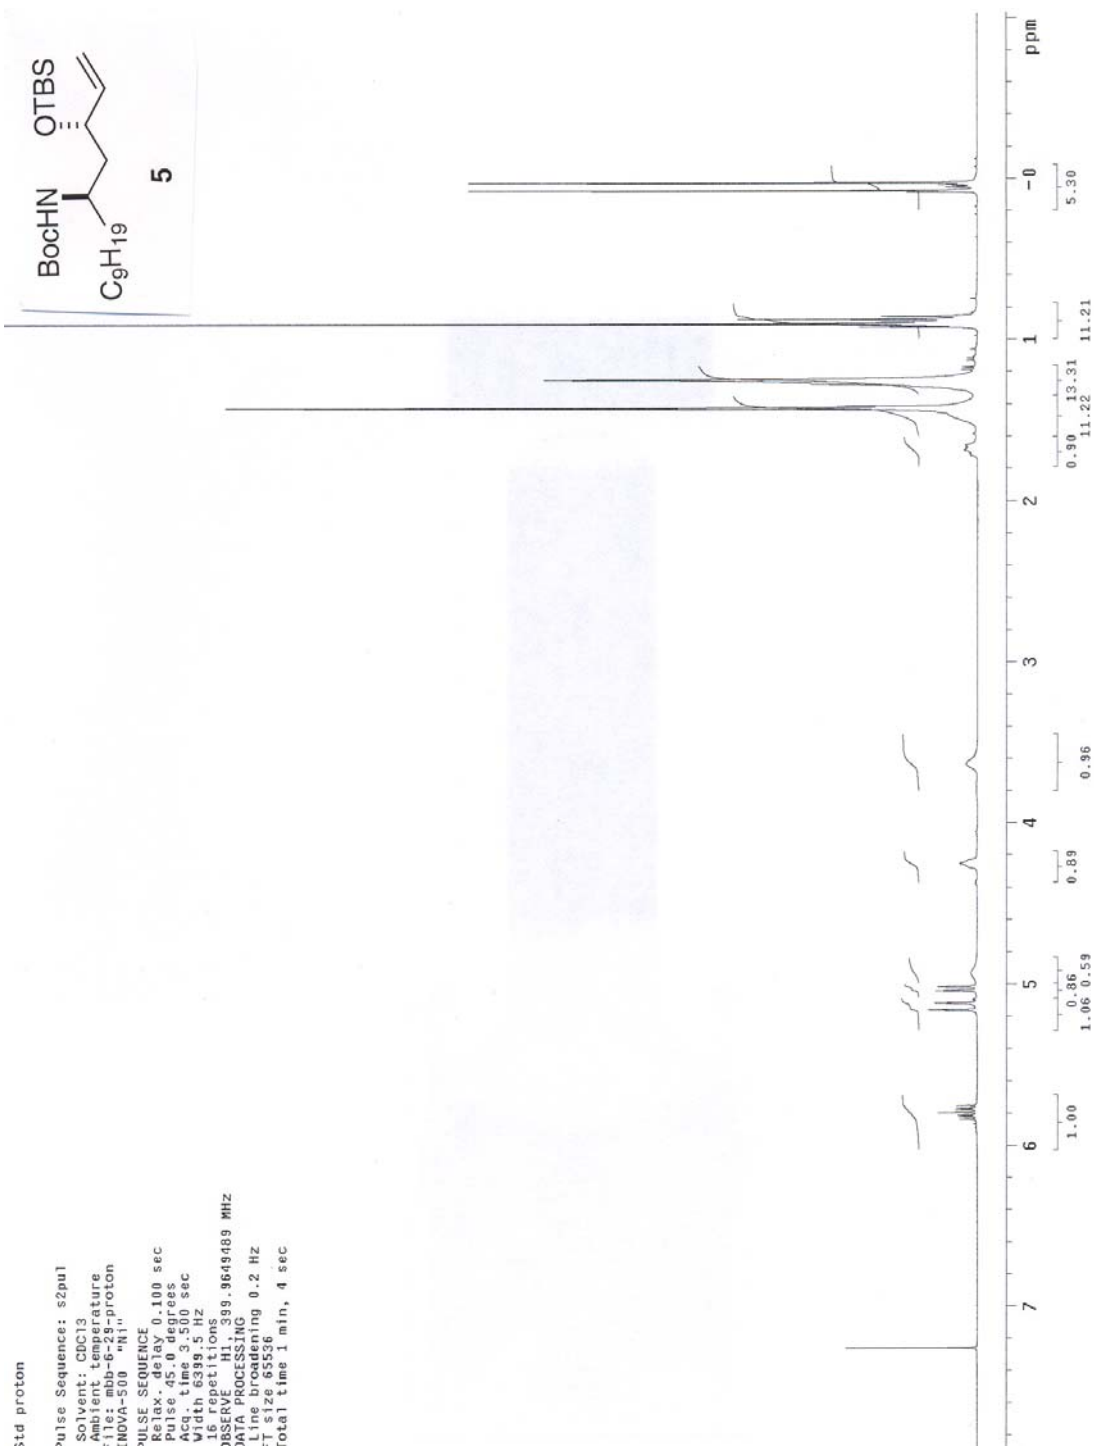

Std Carbon

Pulse Sequence: s2pu1  
 Solvent: CDCl3  
 Ambient temperature  
 User: i-14-87  
 File: mbb-0-29-C13  
 INOVA-500 "N1"

PULSE SEQUENCE  
 Relax. delay 0.100 sec  
 Pulse 45.0 degrees  
 Acq. time 1.300 sec  
 Width 24140.0 Hz  
 448 repetitions

OBSERVE C13, 100.5712673 MHz  
 DECOUPLE H1, 399.5669644 MHz

Power 38 dB  
 continuously on  
 WALTZ-16 modulated  
 DATA PROCESSING  
 Line broadening 1.0 Hz  
 FT size 65536  
 Total time 19 hr, 34 min, 30 sec

| INDEX | FREQUENCY | PPM     | HEIGHT |
|-------|-----------|---------|--------|
| 1     | 15629.808 | 155.410 | 5.1    |
| 2     | 14216.785 | 141.360 | 13.4   |
| 3     | 11471.777 | 114.066 | 20.5   |
| 4     | 7885.437  | 78.406  | 6.2    |
| 5     | 7775.666  | 77.315  | 15.5   |
| 6     | 7743.988  | 77.000  | 16.1   |
| 7     | 7711.572  | 76.678  | 15.8   |
| 8     | 7219.445  | 71.784  | 13.4   |
| 9     | 4839.112  | 48.116  | 14.0   |
| 10    | 4226.163  | 42.022  | 14.0   |
| 11    | 3574.168  | 35.539  | 13.9   |
| 12    | 3204.336  | 31.861  | 57.2   |
| 13    | 3001.002  | 29.840  | 4.9    |
| 14    | 2974.481  | 29.576  | 68.2   |
| 15    | 2972.270  | 29.554  | 48.8   |
| 16    | 2967.113  | 29.503  | 64.1   |
| 17    | 2844.275  | 28.276  | 65.1   |
| 18    | 2855.132  | 28.389  | 152.4  |
| 19    | 2609.806  | 25.950  | 12.5   |
| 20    | 2602.438  | 25.877  | 163.5  |
| 21    | 2592.861  | 25.781  | 31.1   |
| 22    | 2276.809  | 22.639  | 41.0   |
| 23    | 1811.204  | 18.009  | 12.4   |
| 24    | 1415.587  | 14.075  | 39.6   |
| 25    | -412.945  | -4.106  | 31.9   |
| 26    | -507.982  | -5.051  | 10.6   |

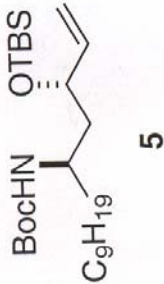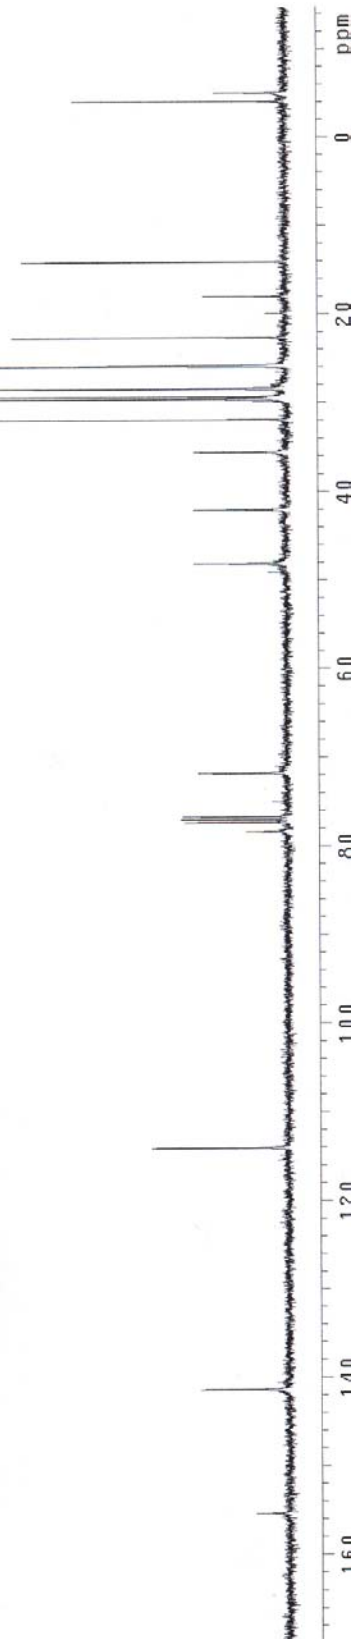

## STANDARD 1H OBSERVE

>pulse Sequence: s2pu1  
 Solvent: CDCl3  
 Ambient temperature  
 file: mbb-5-169-HNMR  
 INOVA-500 "1H"  
 >PULSE SEQUENCE  
 Pulse 39.8 degrees  
 Acq. time 2.666 sec  
 Width 6000.6 Hz  
 16 repetitions  
 300 MHz  
 >DATA PROCESSING  
 Line broadening 0.2 Hz  
 FT size 32768  
 Total time 0 min, 42 sec

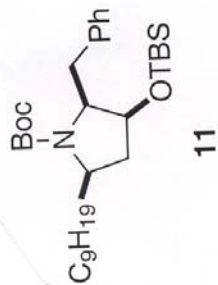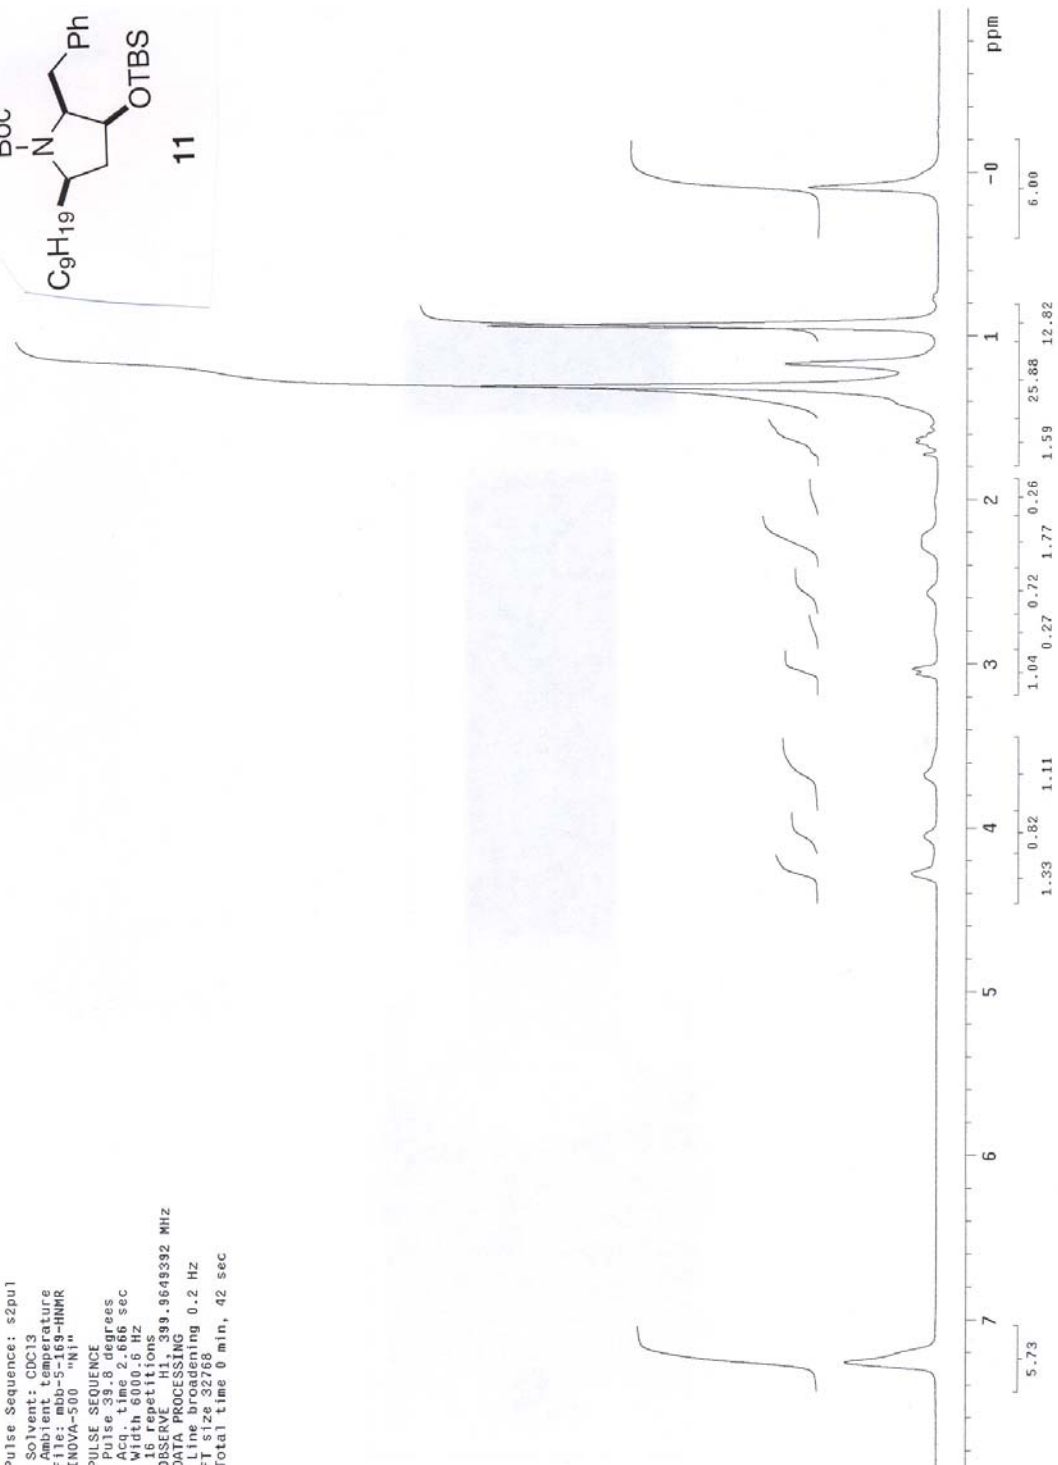

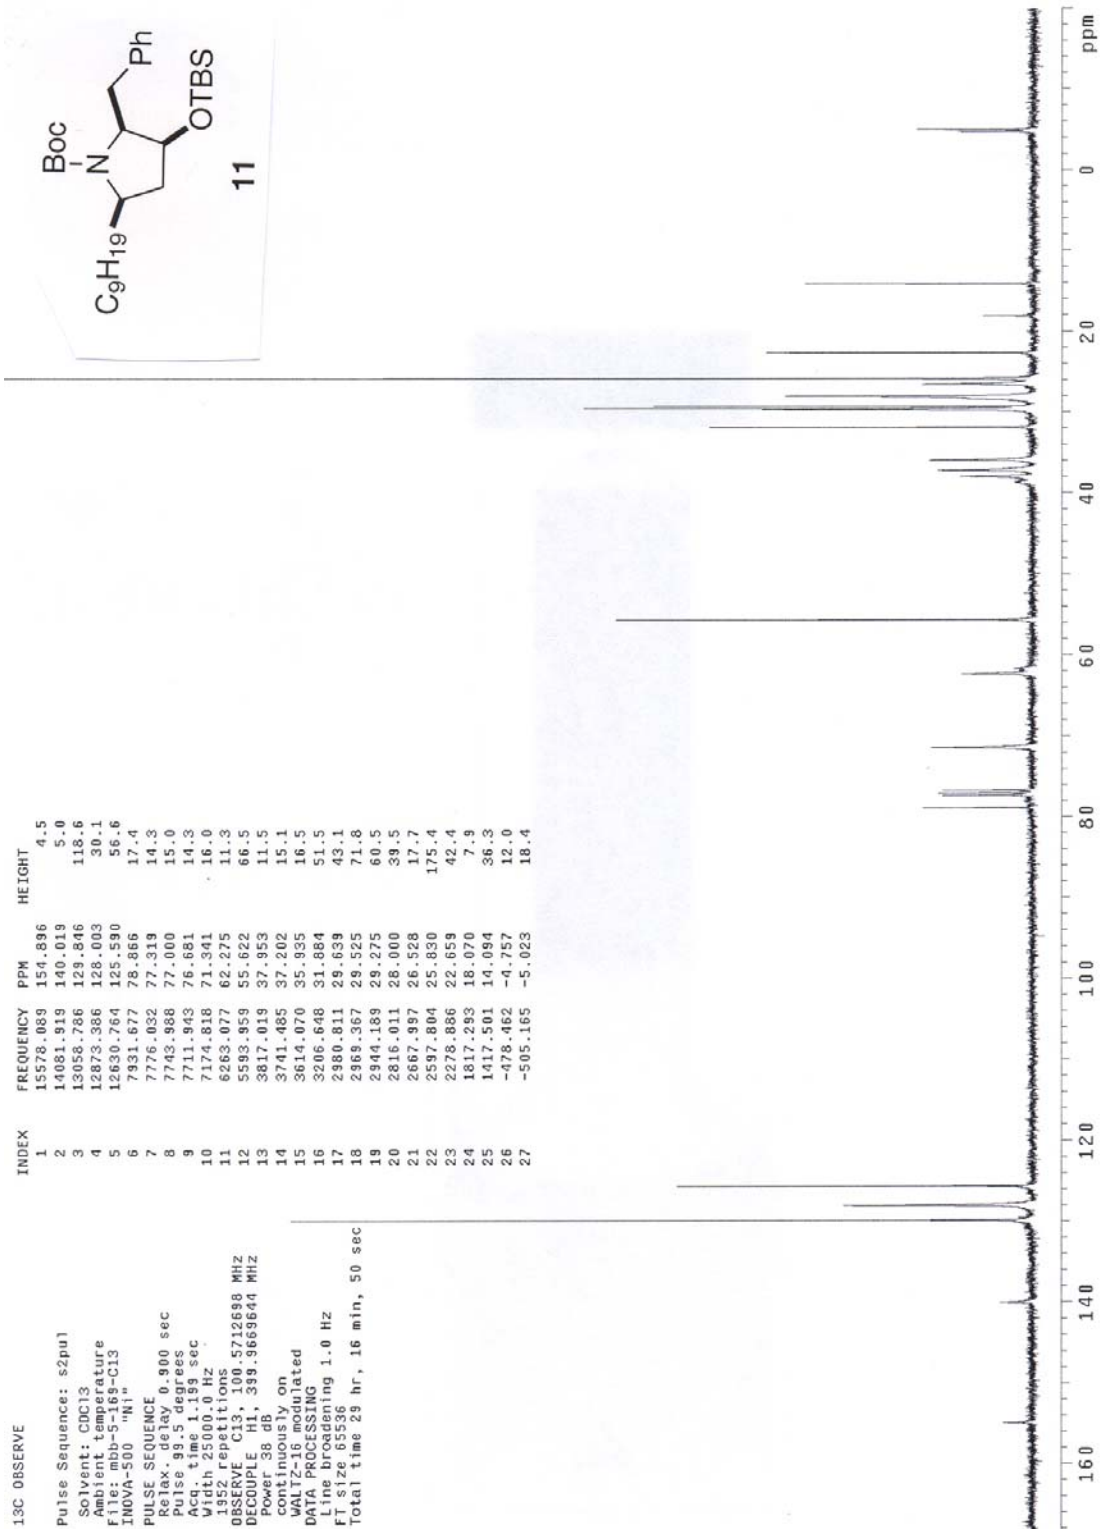

STANDARD 1H OBSERVE

Pulse Sequence: s2pu1  
 Solvent: CDCl3  
 Ambient temperature  
 File: mbb-5-176-HMR  
 INOVA-500 "1H"  
 PULSE SEQUENCE  
 Pulse 39.8 degrees  
 Acq. time 2.666 sec  
 Width 6000.6 Hz  
 OBSERVATIONS  
 DATA ACQUISITION 99.9649655 MHz  
 DATA PROCESSING 0.2 Hz  
 Line broadening 0.2 Hz  
 FT size 32768  
 Total time 0 min, 42 sec

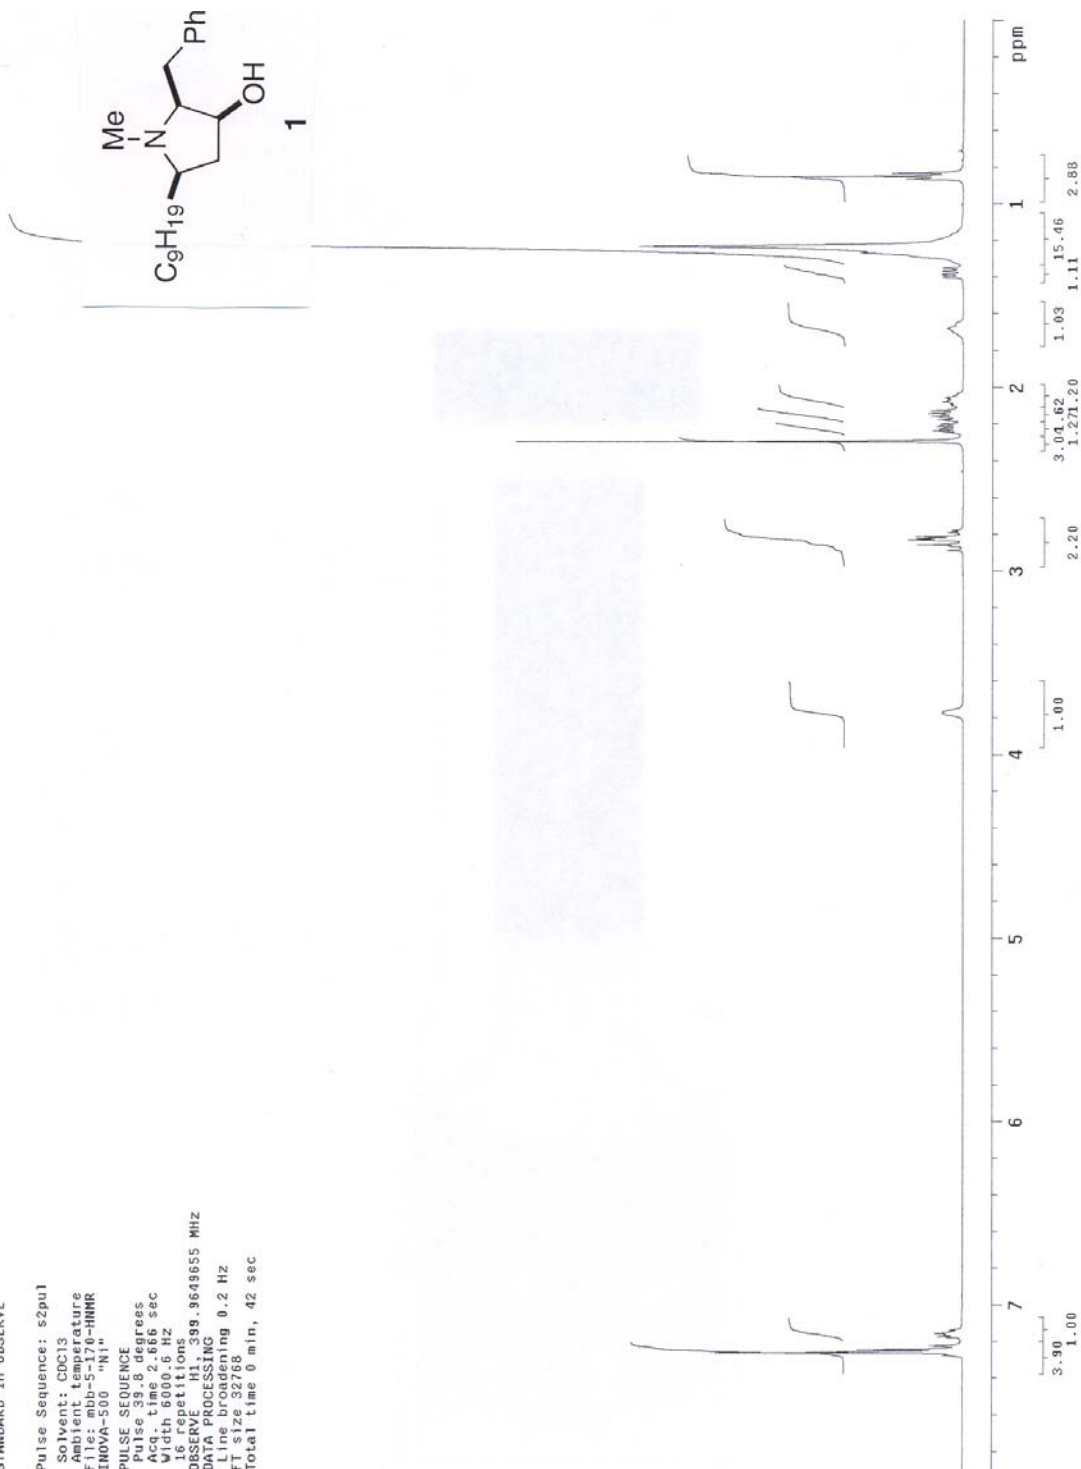

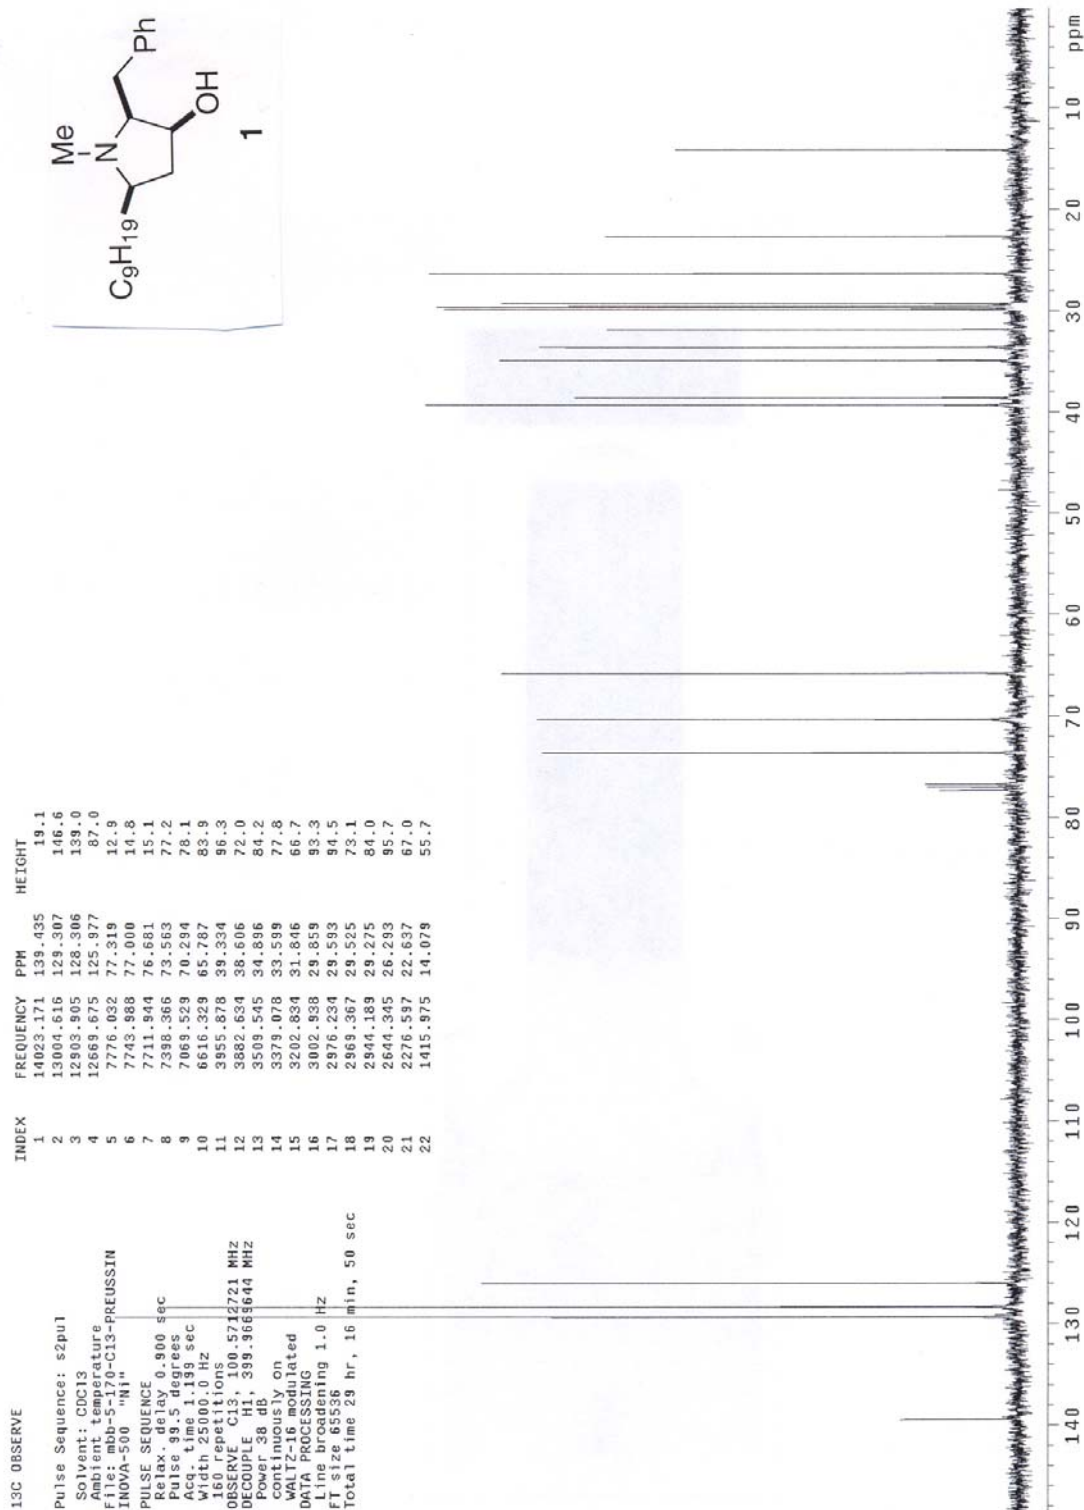

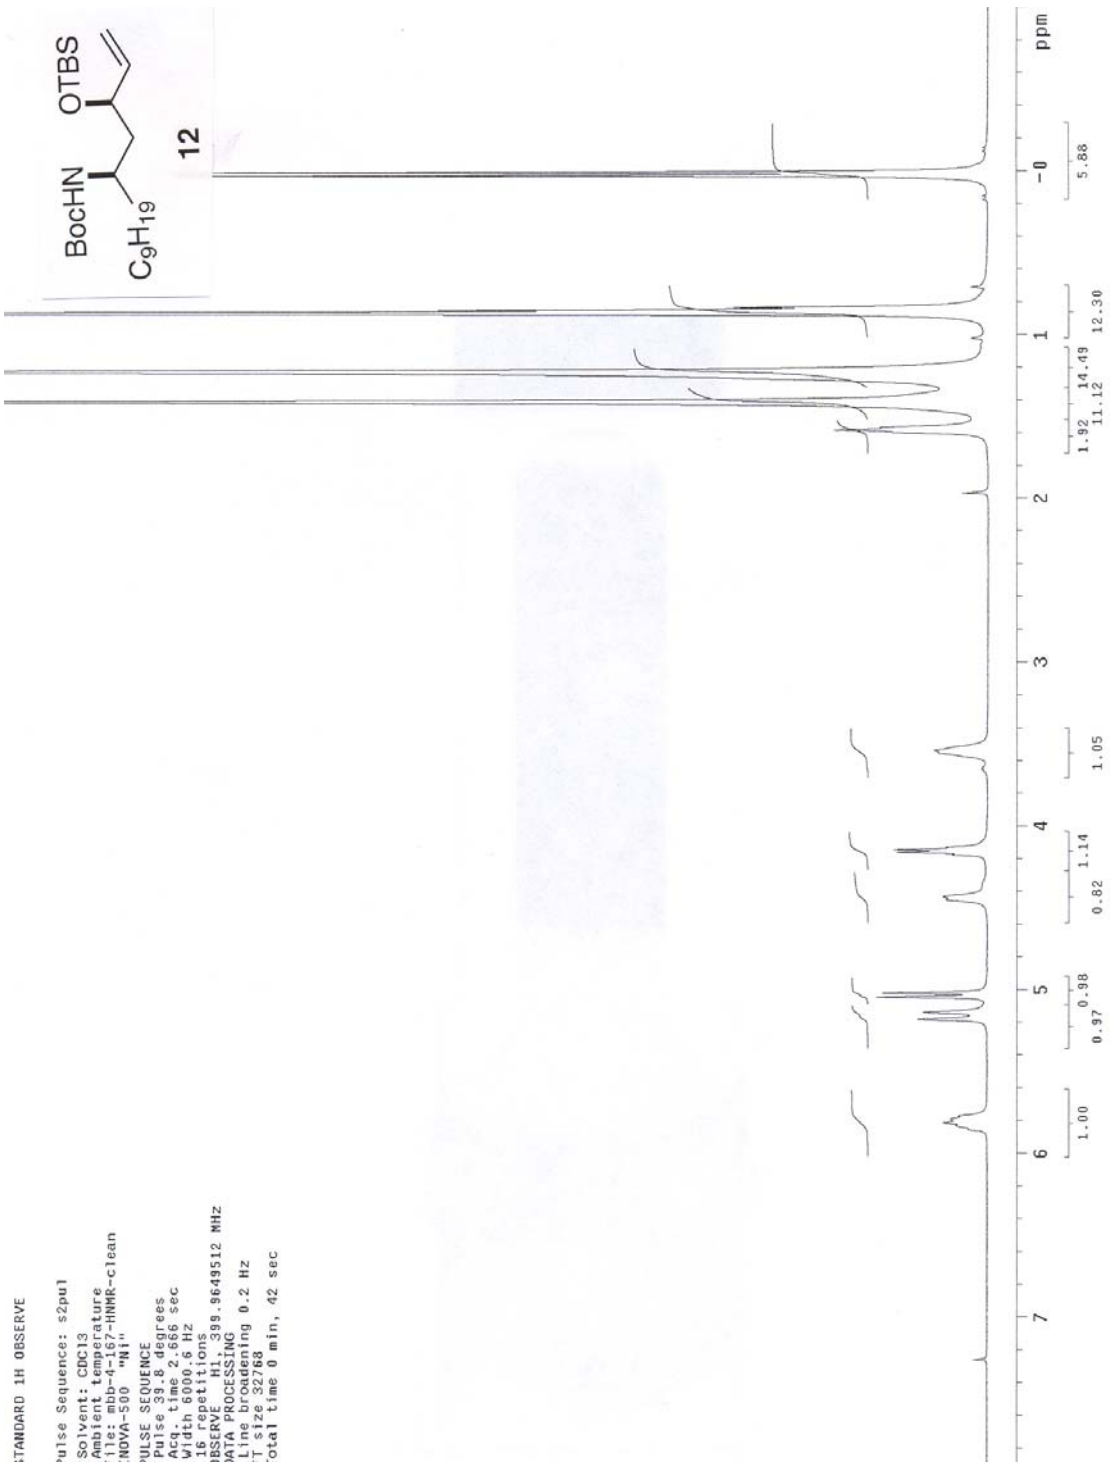



13C OBSERVE

Pulse Sequence: s2pul  
 Solvent: CDCl3  
 Ambient temperature  
 File: mbb-q-167-C13  
 INOVA-500 "N1"  
 PULSE SEQUENCE  
 Relax. delay 0.900 sec  
 Pulse 96.6 degrees  
 Acq. time 1.199 sec  
 Width 25000.0 Hz  
 784 Repetitions  
 OBSERVE C13, 100.5712668 MHZ  
 DECOUPLE H1, 399.9669644 MHZ  
 Power 14.0 dB  
 WALTZ-16, un gated  
 DATA PROCESSING  
 Line broadening 1.0 Hz  
 FT size 65536  
 Total time 29 hr, 16 min, 50 sec

| INDEX | FREQUENCY PPM | HEIGHT  |
|-------|---------------|---------|
| 1     | 15622.341     | 155.336 |
| 2     | 14186.445     | 141.059 |
| 3     | 11504.631     | 114.393 |
| 4     | 7909.550      | 78.646  |
| 5     | 7776.032      | 77.319  |
| 6     | 7743.988      | 77.000  |
| 7     | 7211.943      | 76.681  |
| 8     | 7251.114      | 72.099  |
| 9     | 4846.255      | 48.187  |
| 10    | 4422.811      | 43.977  |
| 11    | 3637.722      | 36.171  |
| 12    | 3617.122      | 35.966  |
| 13    | 3203.596      | 31.854  |
| 14    | 2973.182      | 29.563  |
| 15    | 2967.841      | 29.510  |
| 16    | 2966.315      | 29.495  |
| 17    | 2943.426      | 29.267  |
| 18    | 2854.159      | 28.379  |
| 19    | 2602.382      | 25.876  |
| 20    | 2562.545      | 25.679  |
| 21    | 2275.834      | 22.629  |
| 22    | 1824.923      | 18.146  |
| 23    | 1414.449      | 14.064  |
| 24    | -435.736      | -4.333  |
| 25    | -494.484      | -4.917  |

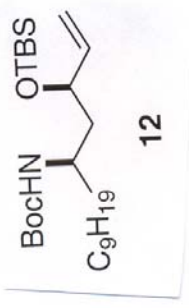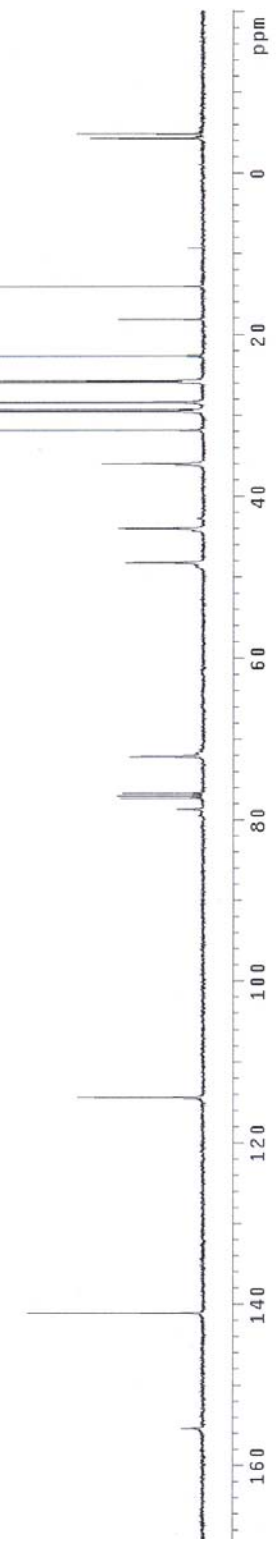

## STANDARD 1H OBSERVE

ulse Sequence: s2pul  
 Solvent: CDCl3  
 Ambient temperature  
 file: mbb-5-157-HMHR  
 NOVA-500 "N1"  
 ULSE SEQUENCE  
 Pulse 39.8 degrees  
 Acq. time 2.666 sec  
 Width 6000.6 Hz  
 Resolution  
 RESERVE TIME 399.9669498 MHZ  
 ATA PROCESSING 0.2 Hz  
 Line size 32768  
 Total time 0 min, 42 sec

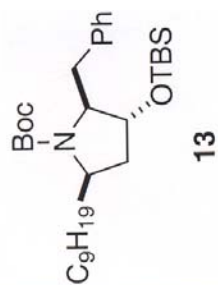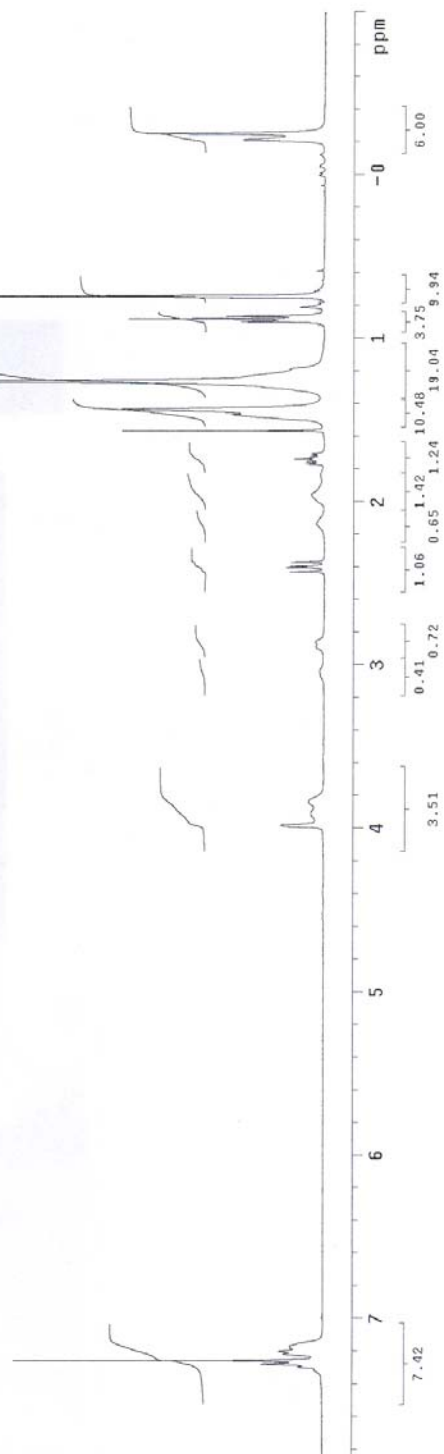



STANDARD 1H OBSERVE

Pulse Sequence: s2pul  
 Solvent: CDC13  
 Ambient temperature  
 File: mbb-5-168-iso  
 INOVA-500 4H1  
 PULSE SEQUENCE  
 Pulse 39.8 degrees  
 Width 16.000000 sec  
 Wait 2.000000 sec  
 Wait 0.000000 sec  
 16 repetitions  
 OBSERVE H1 399.9649534 MHz  
 DATA PROCESSING  
 Line broadening 0.2 Hz  
 FT size 32768  
 Total time 0 min, 42 sec

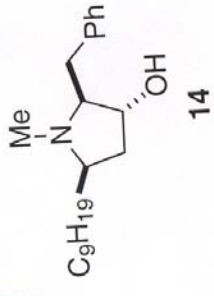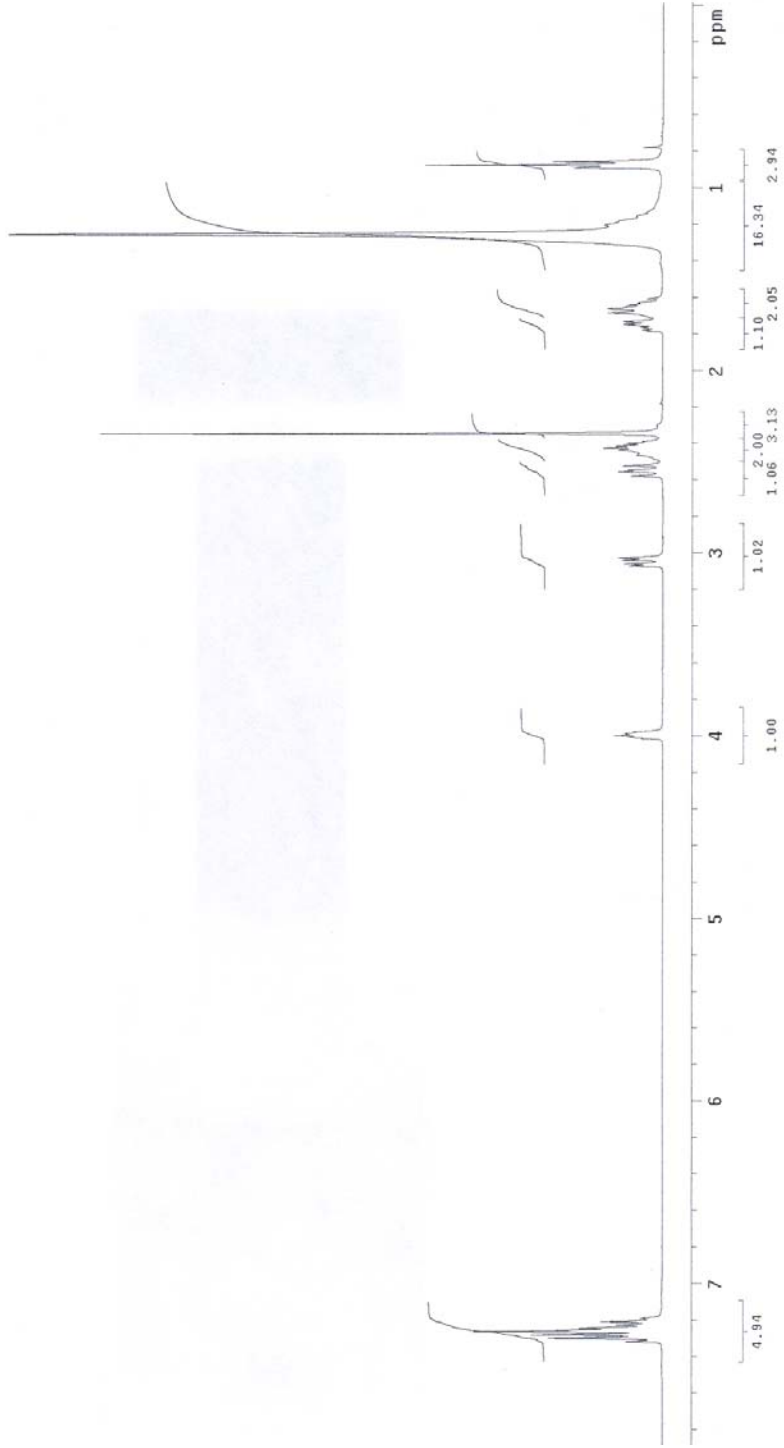

## 13C OBSERVE

Pulse Sequence: s2pu1  
 Solvent: CDCl3  
 Ambient temperature  
 File: mbb-5-168-C13  
 INOVA-500 "N1"

PULSE SEQUENCE  
 Relax delay 0.900 sec  
 Pulse 99.5 degrees  
 Acq. time 1.193 sec  
 Width 23000.0 Hz  
 27

OBSERVE EP13, 100.5712675 MHz  
 DECOUPLE H1, 399.9669664 MHz  
 Power 38 dB, 399.9669664 MHz

continuously on  
 WALTZ-16 modulated

DATA PROCESSING

Line broadening 1.0 Hz

FT size 65536

Total time 29 hr, 16 min, 50 sec

| INDEX | FREQUENCY PPM | HEIGHT  |
|-------|---------------|---------|
| 1     | 13868.238     | 138.889 |
| 2     | 13000.038     | 129.262 |
| 3     | 12936.712     | 128.632 |
| 4     | 12711.638     | 126.394 |
| 5     | 7776.032      | 77.319  |
| 6     | 7760.773      | 77.167  |
| 7     | 7743.888      | 77.000  |
| 8     | 7712.706      | 76.689  |
| 9     | 7514.336      | 74.717  |
| 10    | 6527.062      | 64.900  |
| 11    | 3959.692      | 39.372  |
| 12    | 3936.041      | 39.137  |
| 13    | 3927.648      | 39.053  |
| 14    | 3404.256      | 33.848  |
| 15    | 3205.885      | 31.877  |
| 16    | 3012.856      | 29.957  |
| 17    | 2976.233      | 29.593  |
| 18    | 2971.656      | 29.548  |
| 19    | 2948.004      | 29.313  |
| 20    | 2653.500      | 26.384  |
| 21    | 2279.648      | 22.667  |
| 22    | 1419.027      | 14.110  |

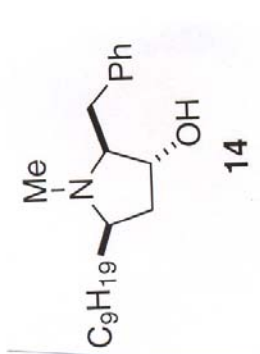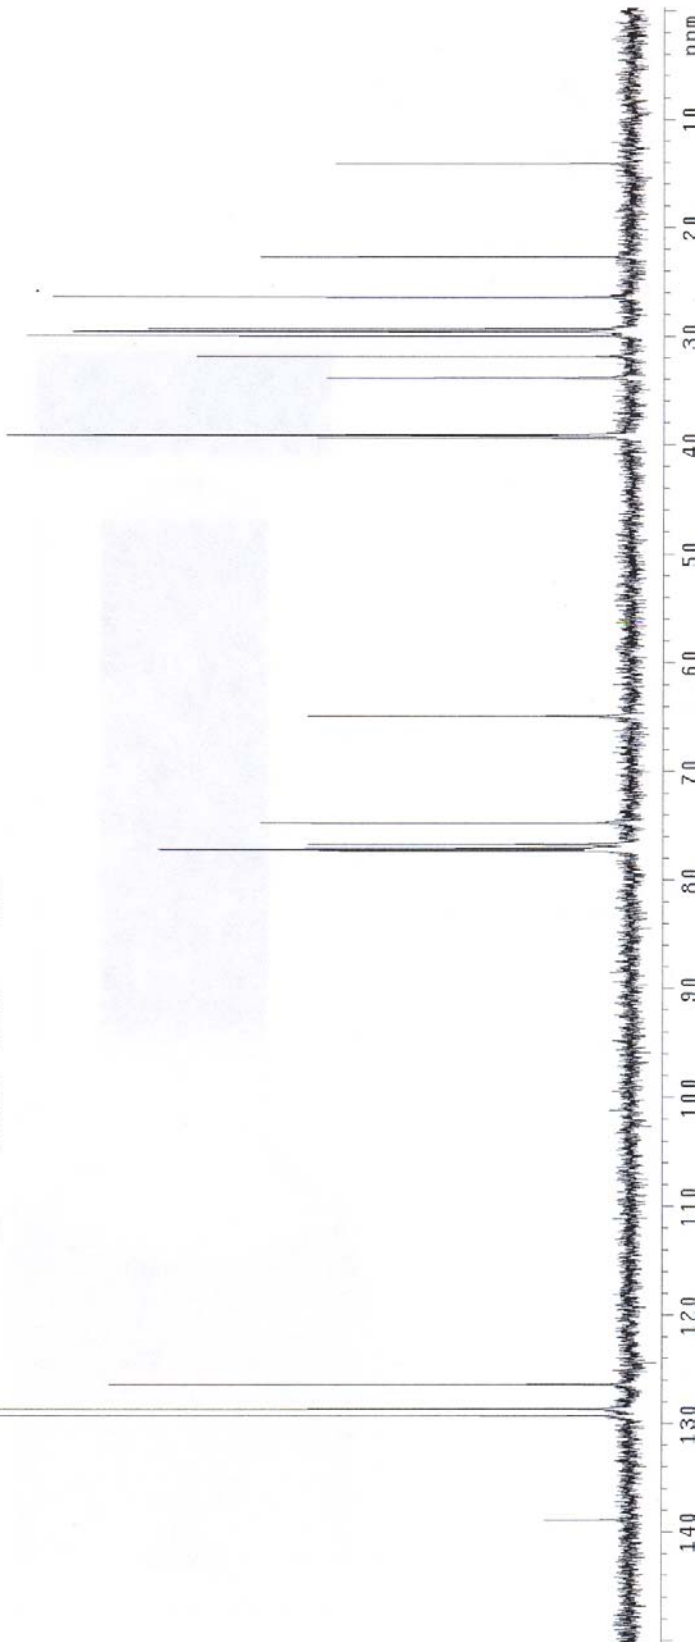

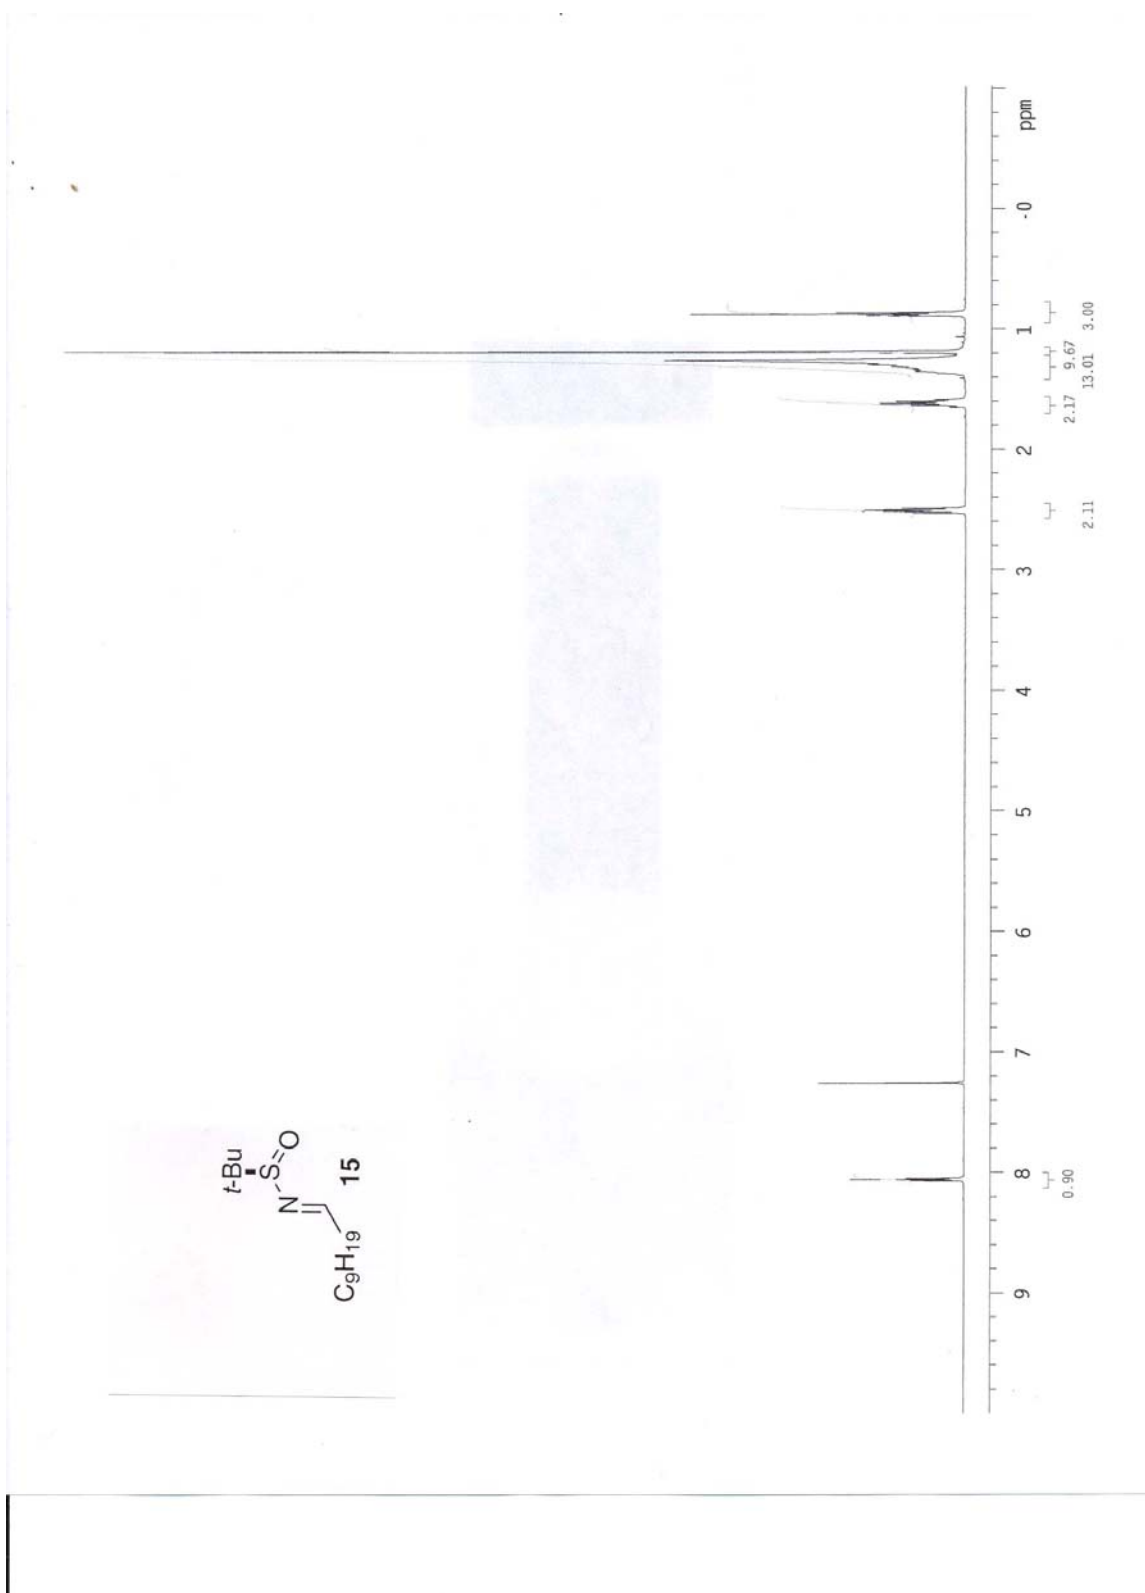

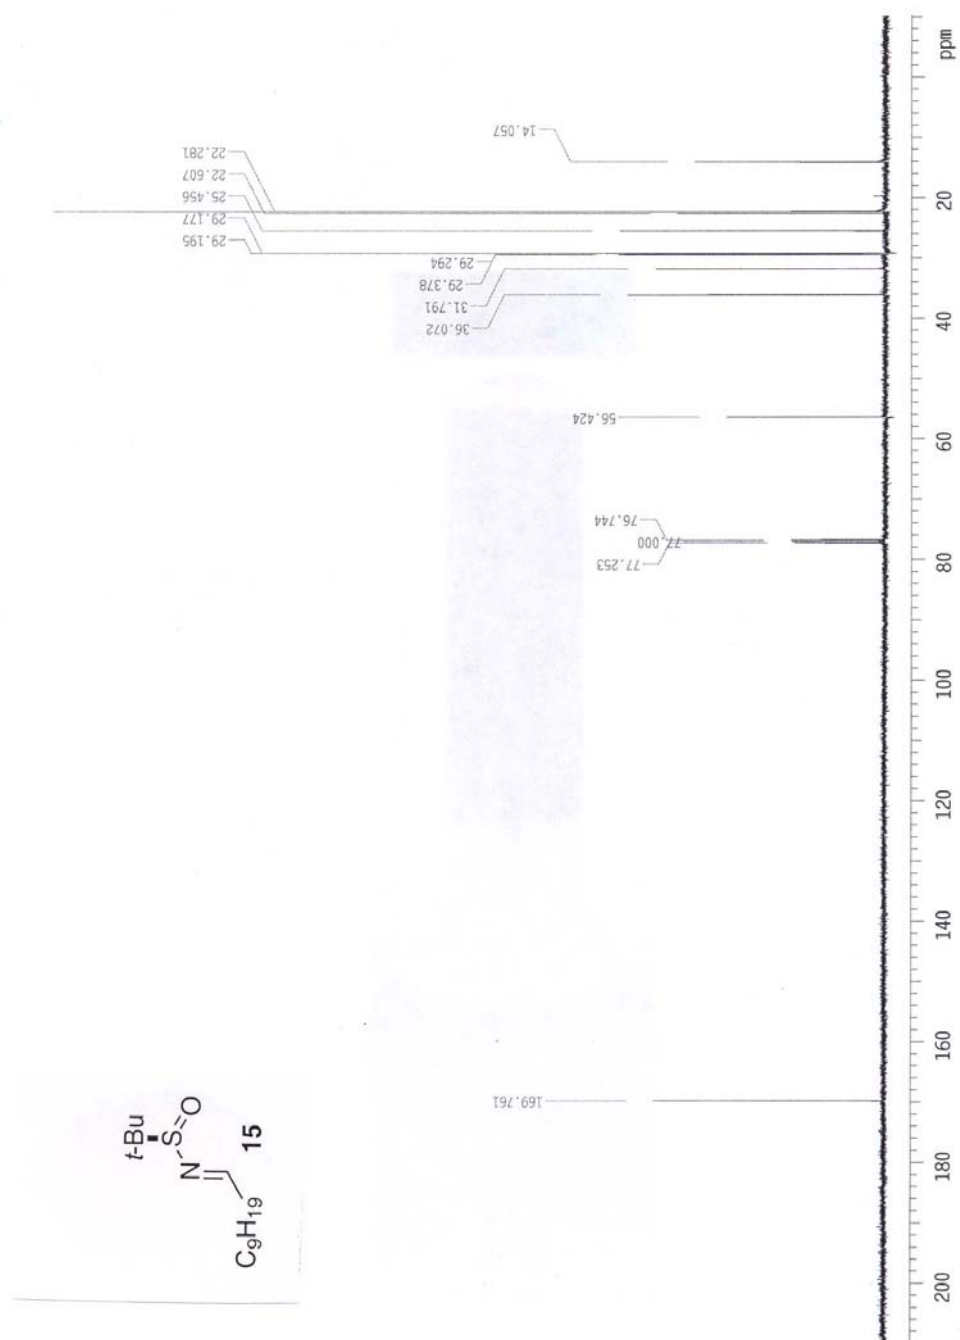

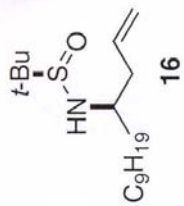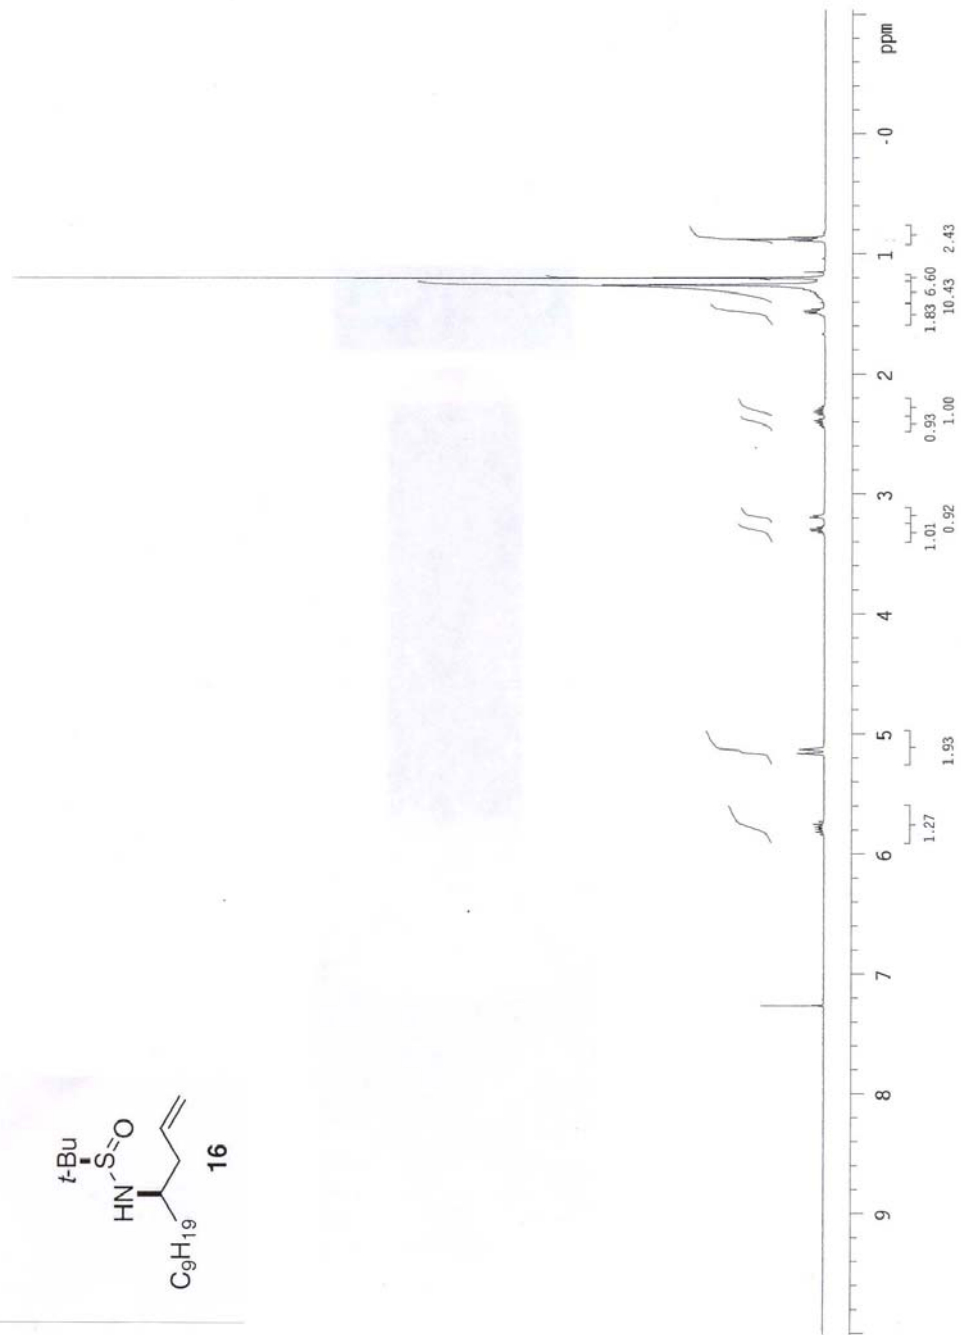



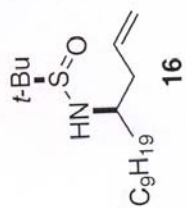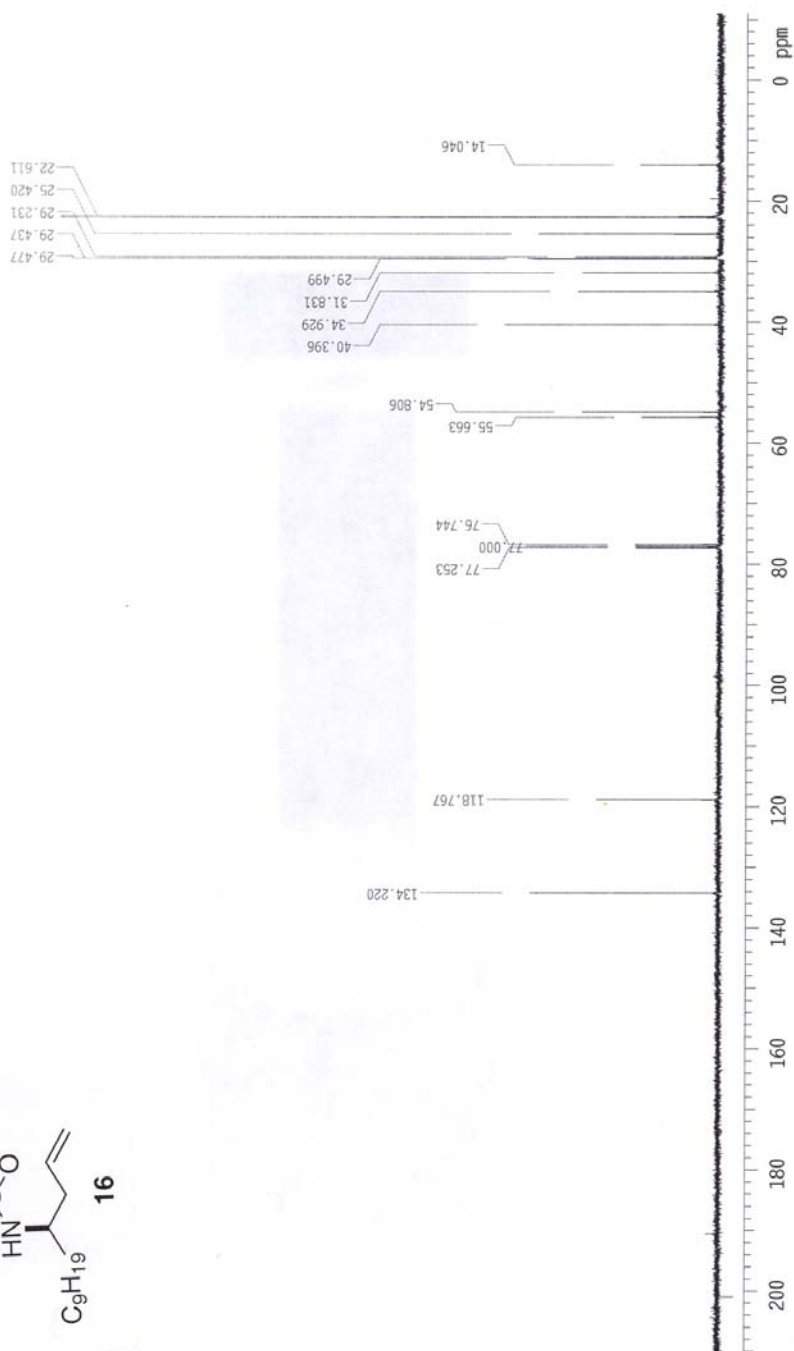

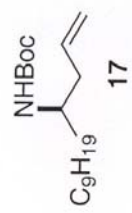

ppm

-0

1

2

3

4

5

6

7

8

9

17.78  
11.83  
3.00

2.21

0.97

0.83

2.20

0.94

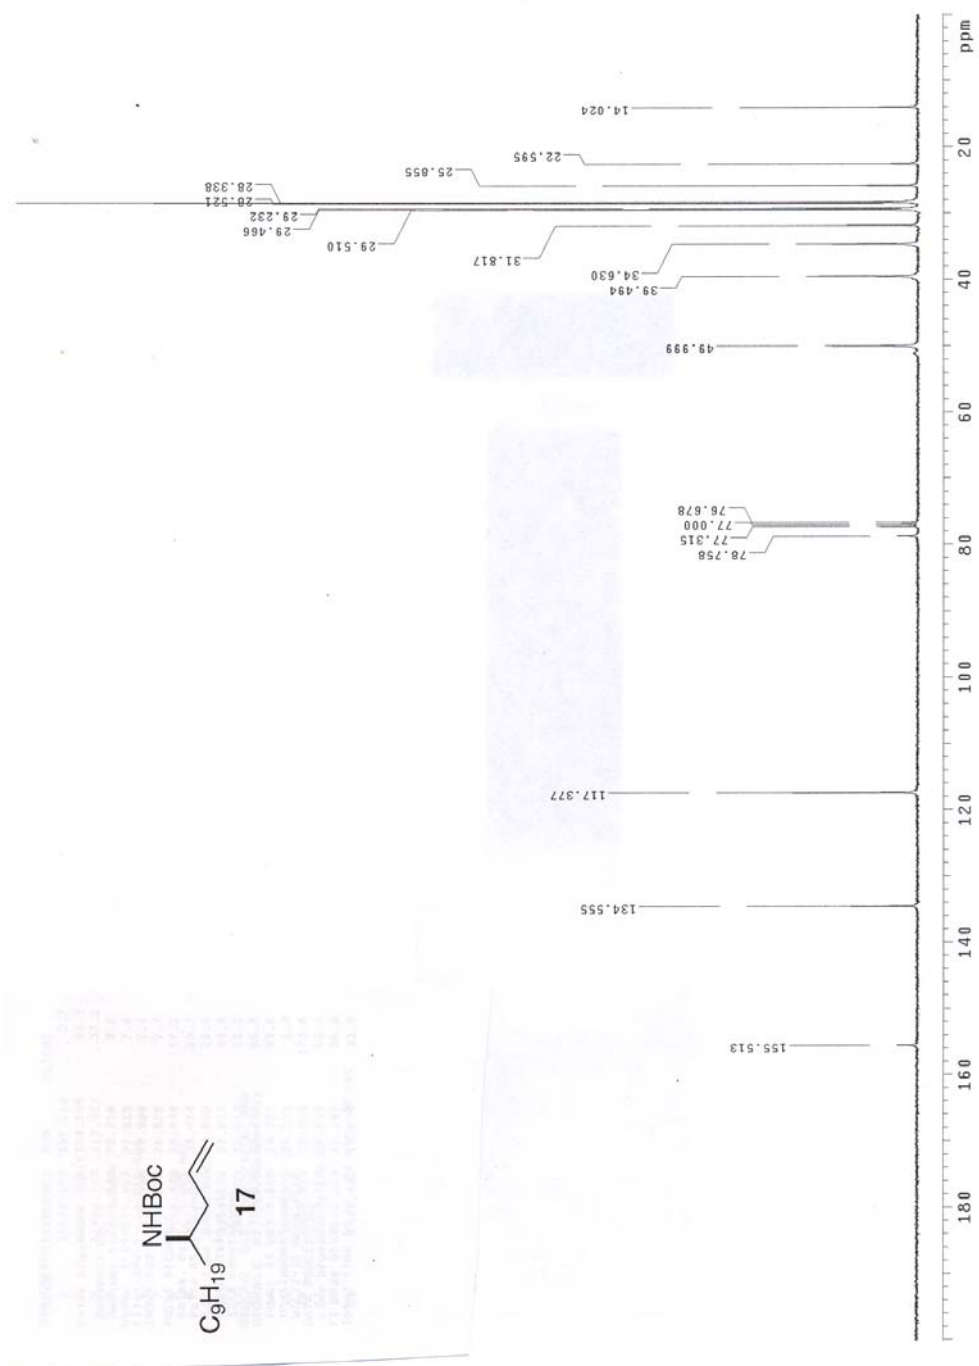

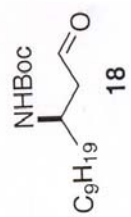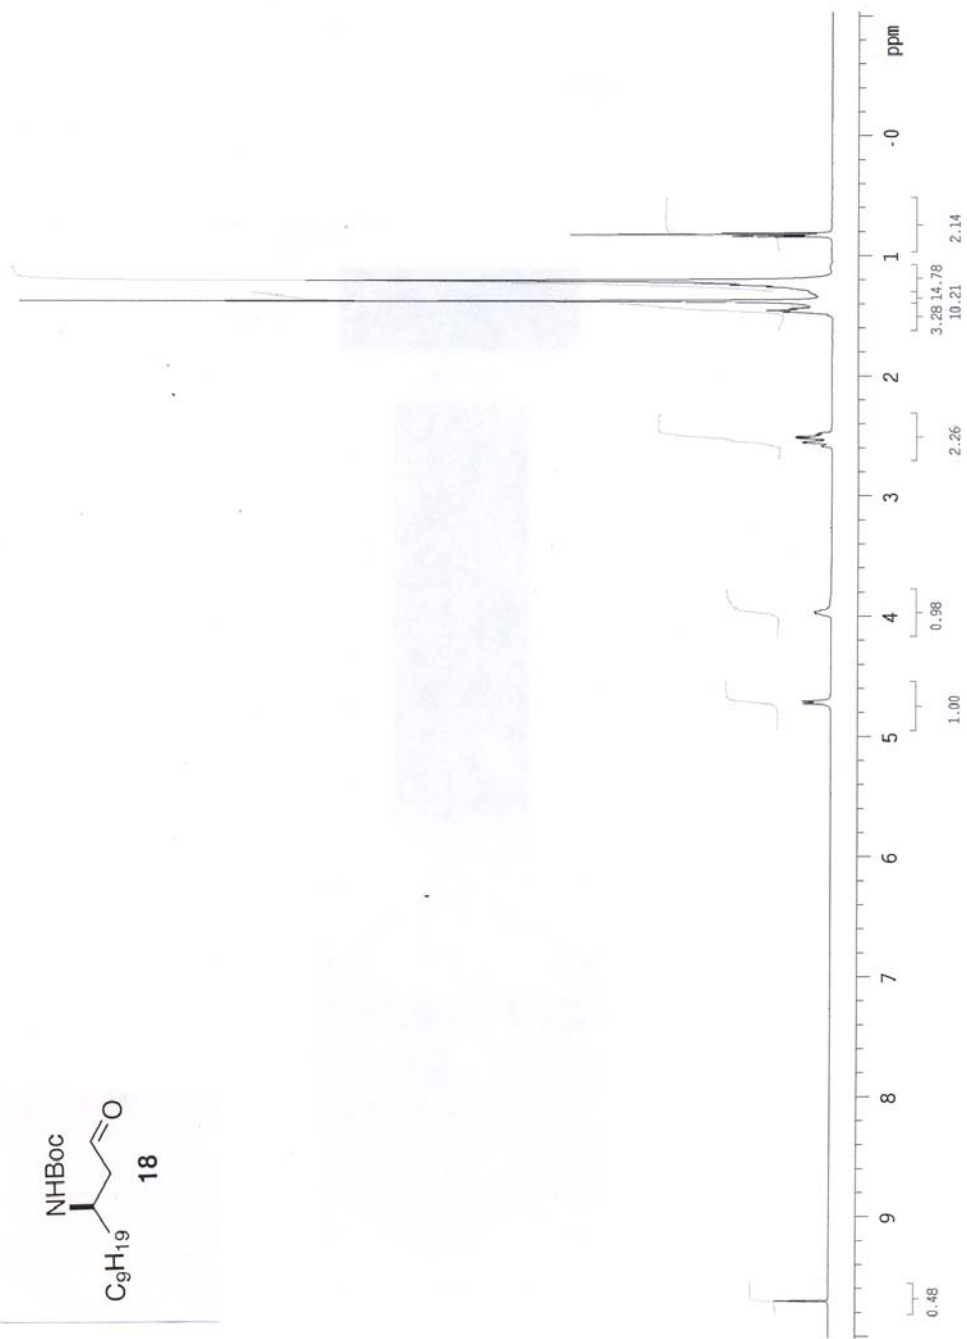

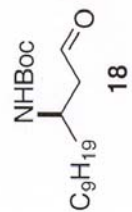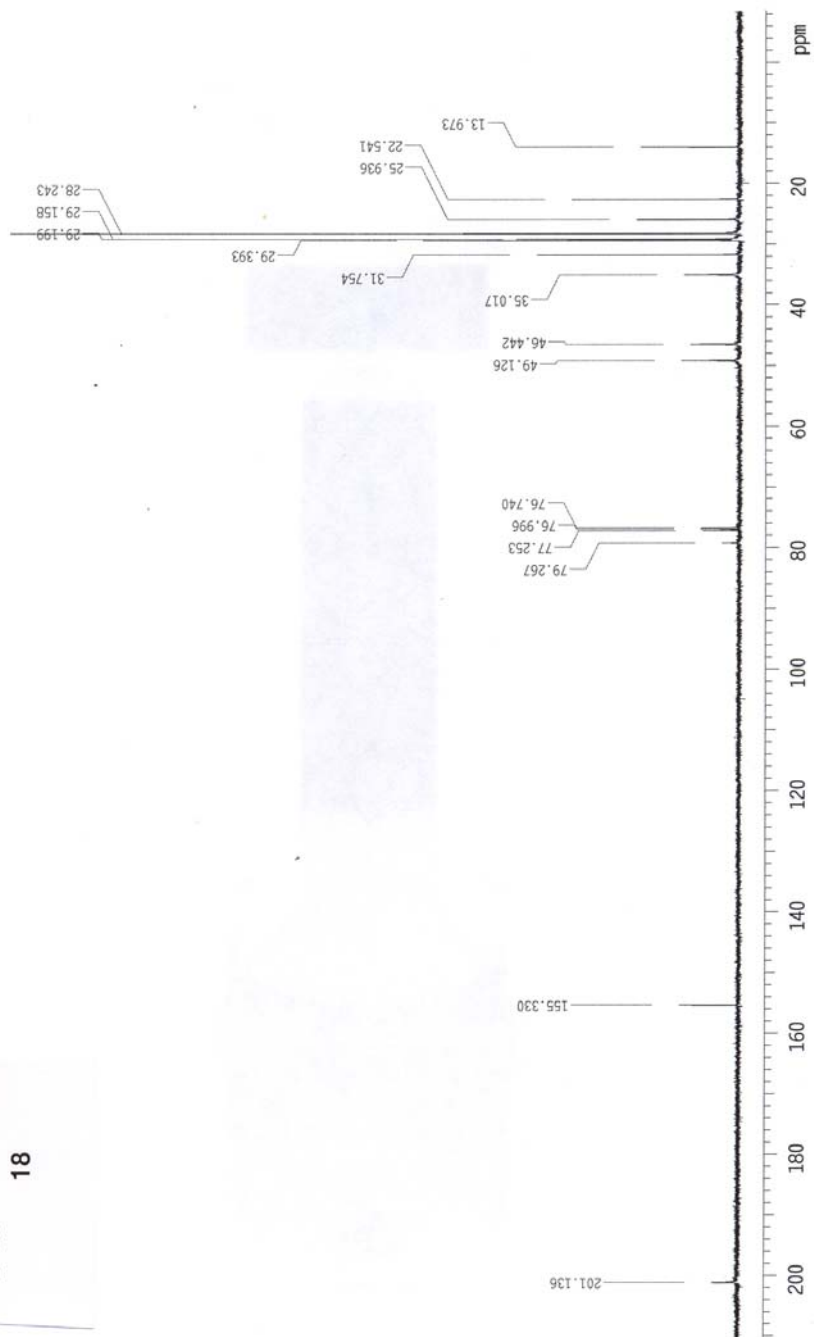

STANDARD 1H OBSERVE

Pulse Sequence: s2pu1  
 Solvent: CDCl3  
 Acquisition Date: 11/11/02  
 File: mbb-5-171-HMR  
 INOVA-500 "1H"  
 PULSE SEQUENCE  
 Pulse 39.8 degrees  
 Acq. time 2.666 sec  
 Relaxation delay 1.000 sec  
 16 repetitions  
 OBSERVE H1, 399.9649494 MHZ  
 DATA PROCESSING  
 Line broadening 0.2 Hz  
 Frequency offset 0.0000000 MHz  
 Total time 0 min, 42 sec

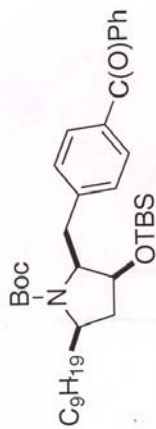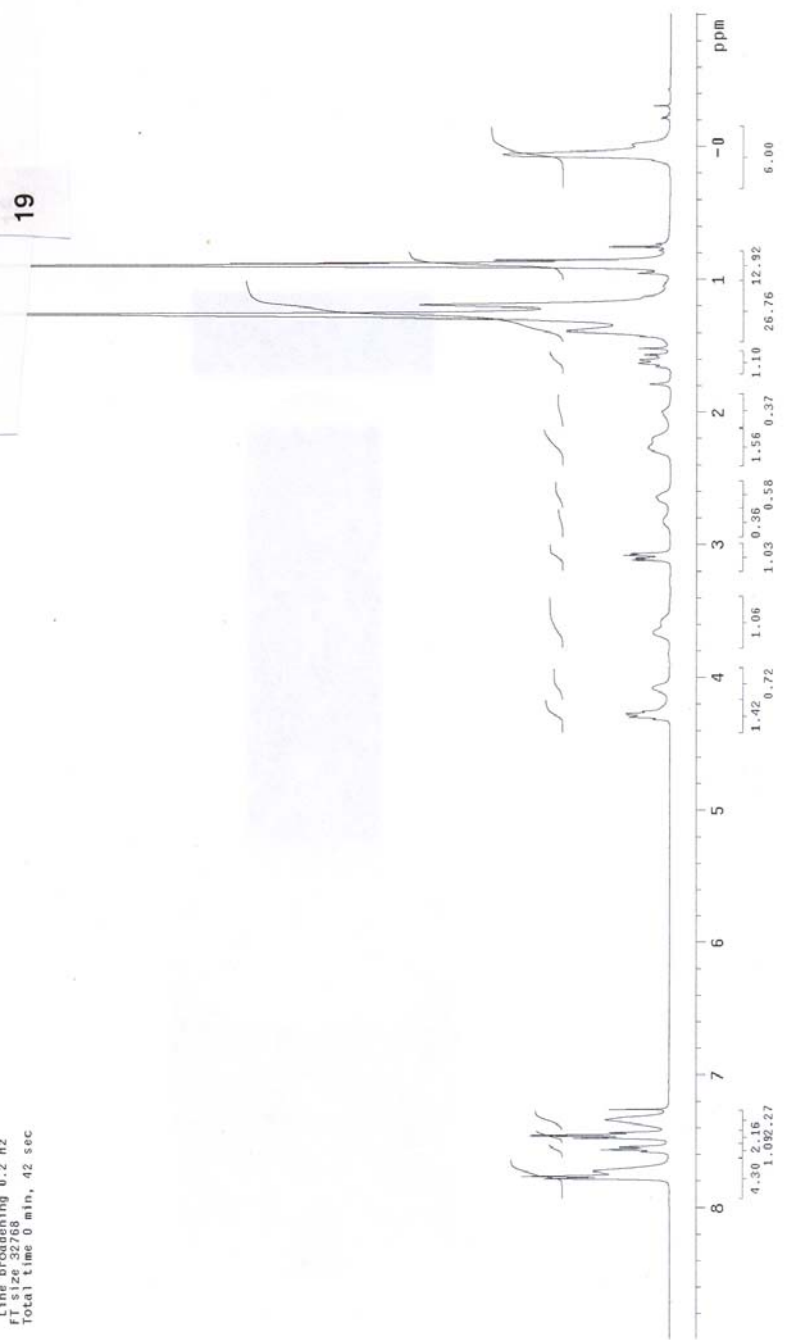

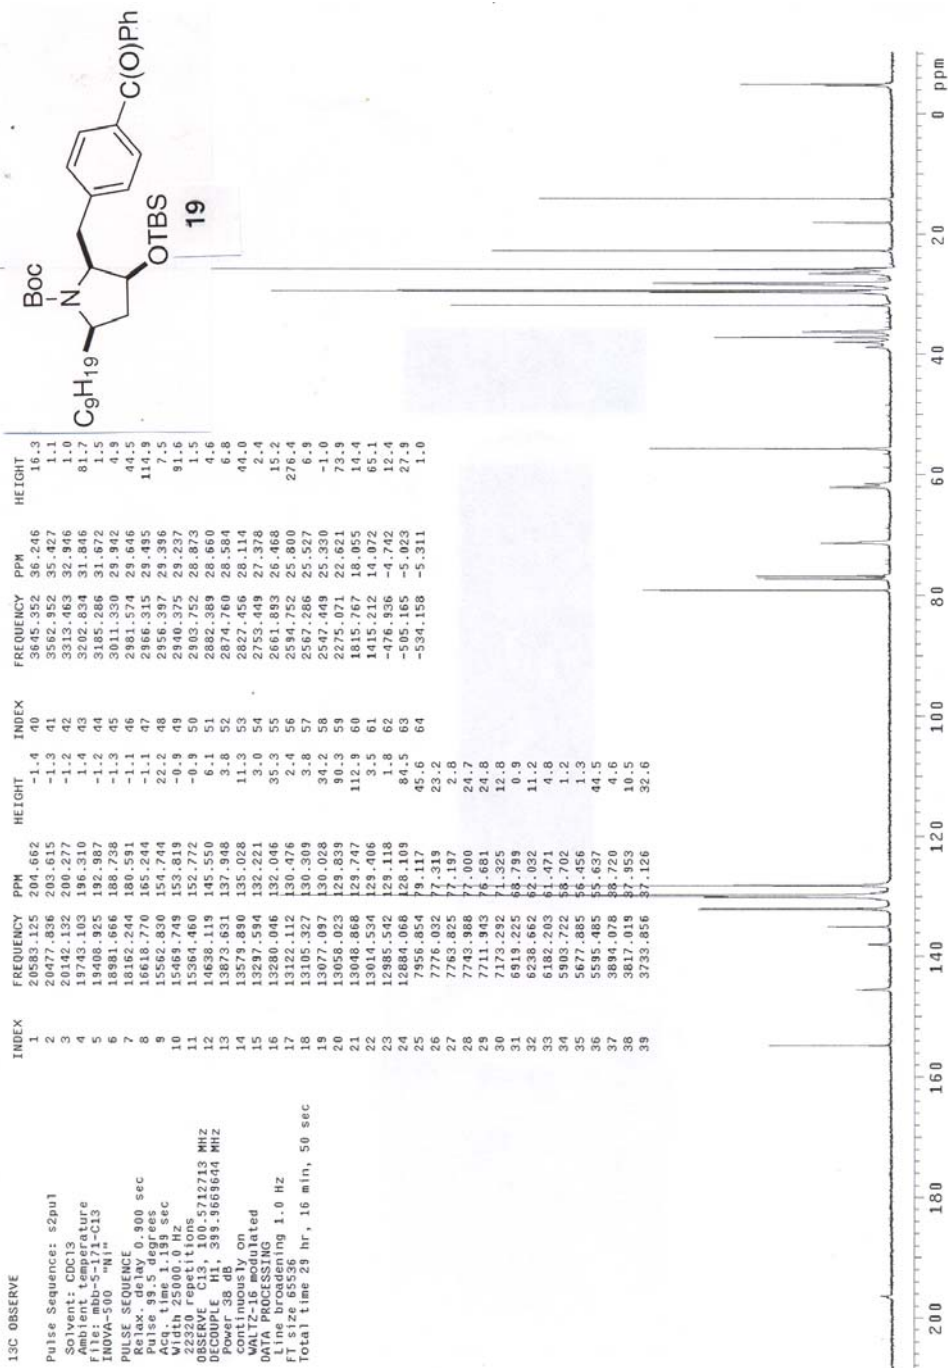

STANDARD 1H OBSERVE

Pulse Sequence: s2p01  
 Solvent: CDCl3  
 Acquisition Date: 11/11/03  
 File: mbb-5-172-HNMR  
 INOVA-500 "1H"  
 PULSE SEQUENCE  
 Pulse 39.8 degrees  
 Acq. time 2.666 sec  
 Relaxation time 1.000 sec  
 16 repetitions  
 OBSERVE H1, 399.9649586 MHz  
 DATA PROCESSING  
 Line broadening 0.2 Hz  
 Frequency offset 0.000 Hz  
 Total time 0 min, 42 sec

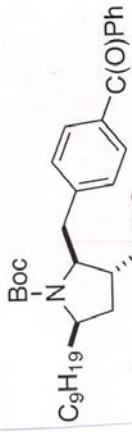

20

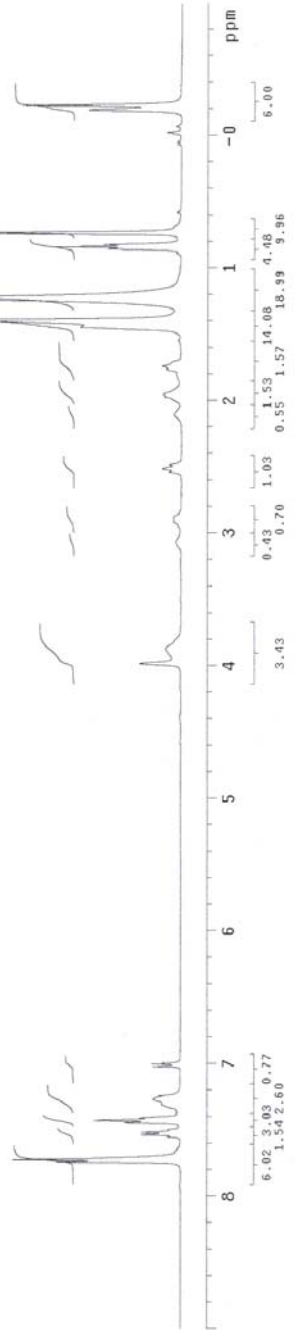



13C OBSERVE

Pulse Sequence: s2pu1  
Solvent: CDCl3  
File: mb-5-172-C13secondry  
INOVA-500 "1H"  
PULSE SEQUENCE  
Relax. delay 0.900 sec  
Pulse 99.5 degrees  
Acq. t 1.018 sec  
Width 25000.0 Hz  
3152 repetitions  
OBSERVE C13, 100.5712790 MHz  
DECOUPLE H1, 399.3663644 MHz  
Pulsed continuously on  
WALTZ-16 modulated  
DATA PROCESSING  
Line broadening 1.0 Hz  
File size 65528  
Total time 28 hr, 16 min, 50 sec

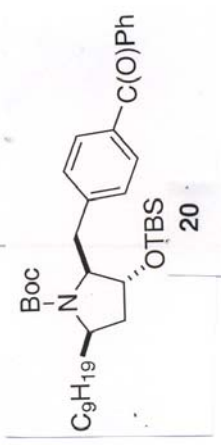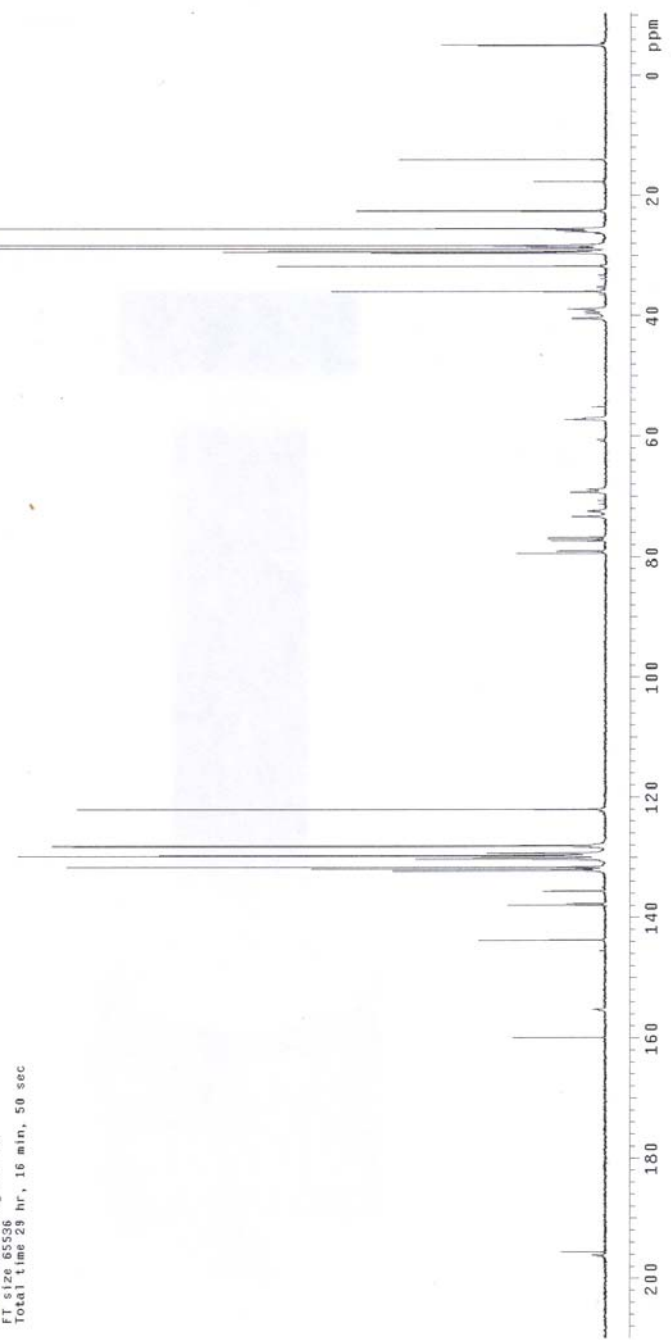

Std proton

Pulse Sequence: s2pul  
 Solvent: CDCl3  
 Acquisition  
 File: mb-5-202-11MR  
 INOVA-500 "1H"  
 PULSE SEQUENCE  
 Relax delay 0.100 sec  
 Pulse 45.0 degrees  
 Acq time 3.500 sec  
 Width 639.5 Hz  
 16 repetitions  
 OBSERVE H1, 399.9643487 MHz  
 DATA PROCESSING  
 Line broadening 0.2 Hz  
 FT of 6553  
 Total time 1 min, 4 sec

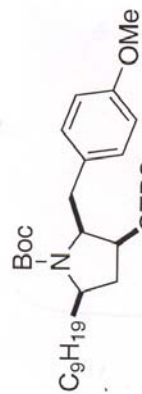

21

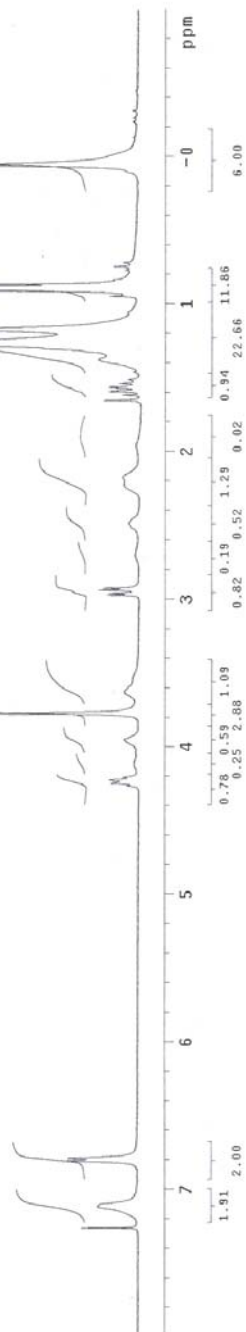

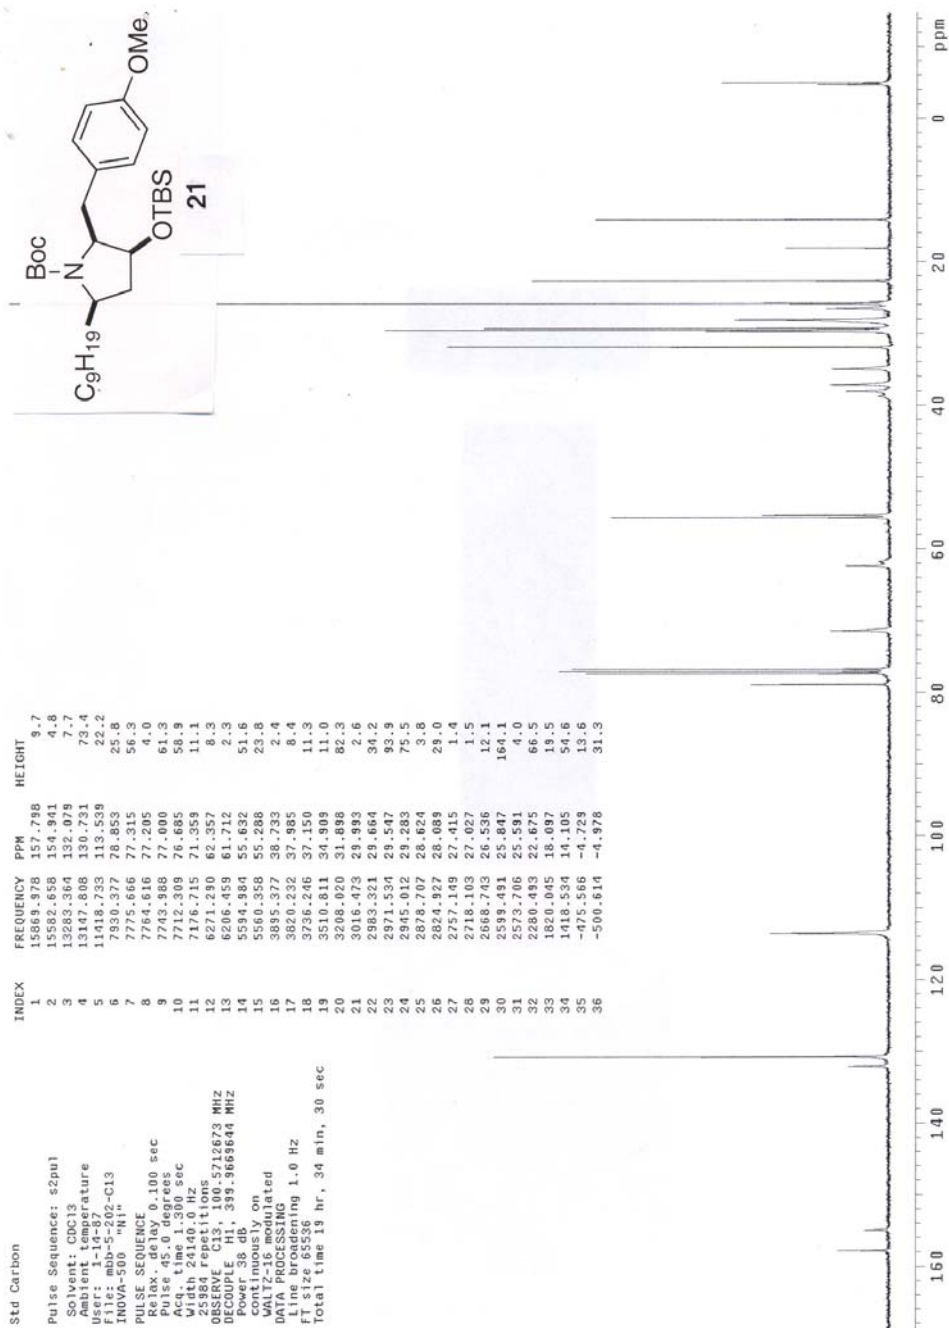

Standard proton  
 Pulse Sequence: s2pul  
 Solvent: CDCl3  
 Ambient Temperature  
 File: abb-6-1-iso-HMR  
 INOVA-500 "N1"  
 PULSE SEQUENCE  
 Relax. delay 0.500 sec  
 Pulse 45.0 degrees  
 Acq. time 0.08 sec  
 Width 7998.4 Hz  
 16 repetitions  
 OBSERVE H1, 499.9042608 MHz  
 DATA PROCESSING  
 FT size 65536  
 Total time 1 min, 3 sec

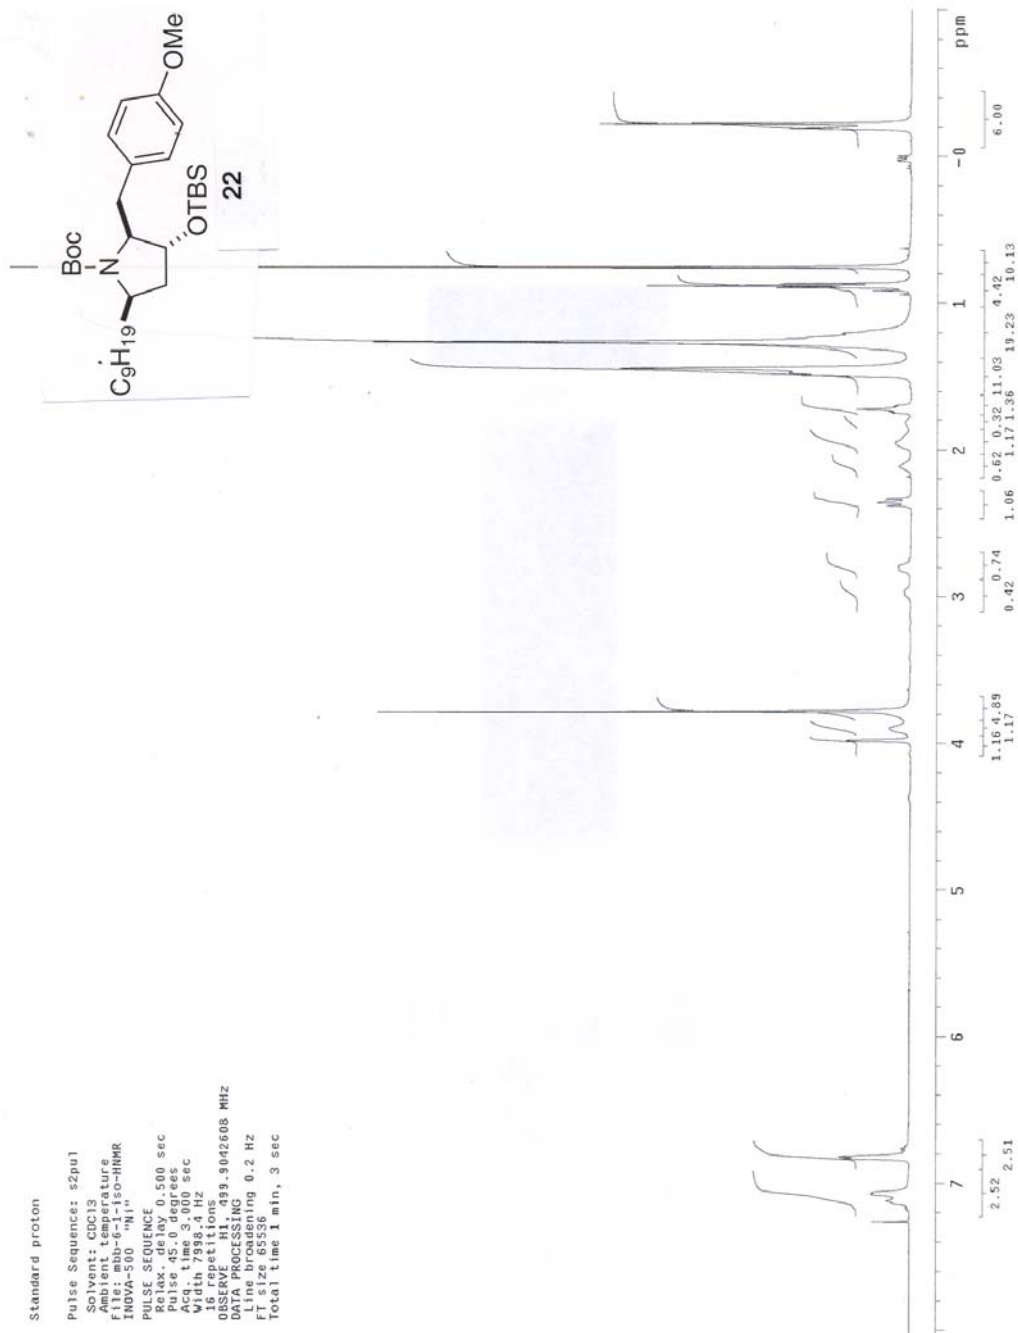

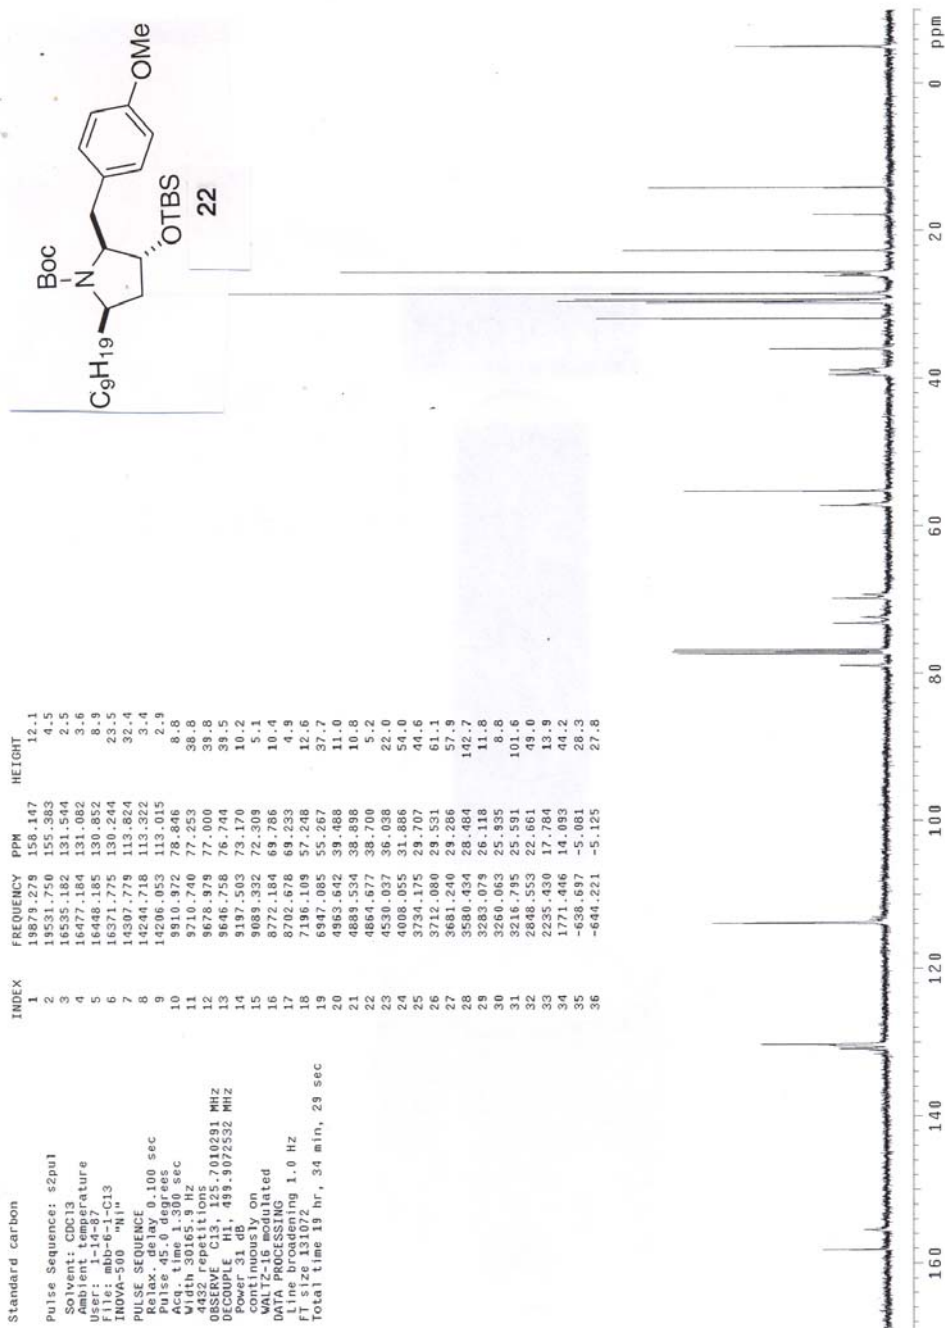

Std proton

Pulse Sequence: s2pu1  
 Solvent: CDCl3  
 Ambient temperature  
 INOVA-500 -HMRpure  
 INOVA-500 -H1  
 PULSE SEQUENCE  
 Relax delay 0.100 sec  
 Pulse 45.0 degrees  
 Acq. time 3.500 sec  
 Width 6399.5 Hz  
 OBSERVE F1 tone 399.9649491 MHz  
 DATA PROCESSING  
 Line broadening 0.2 Hz  
 FI size 65536  
 Total time 1 min, 4 sec

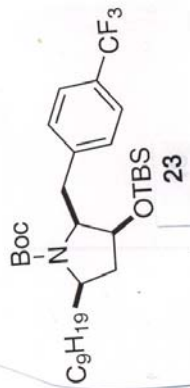

23

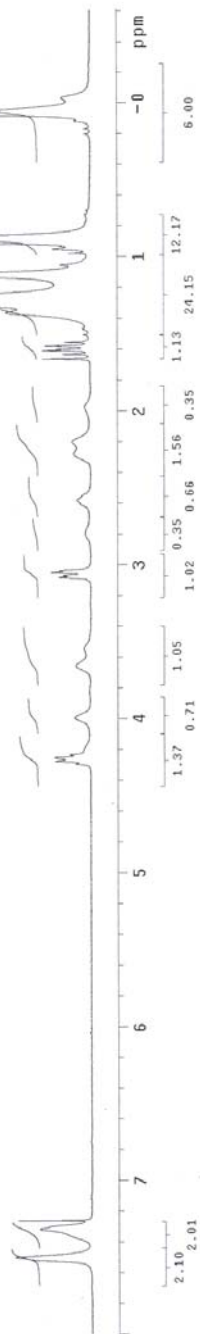

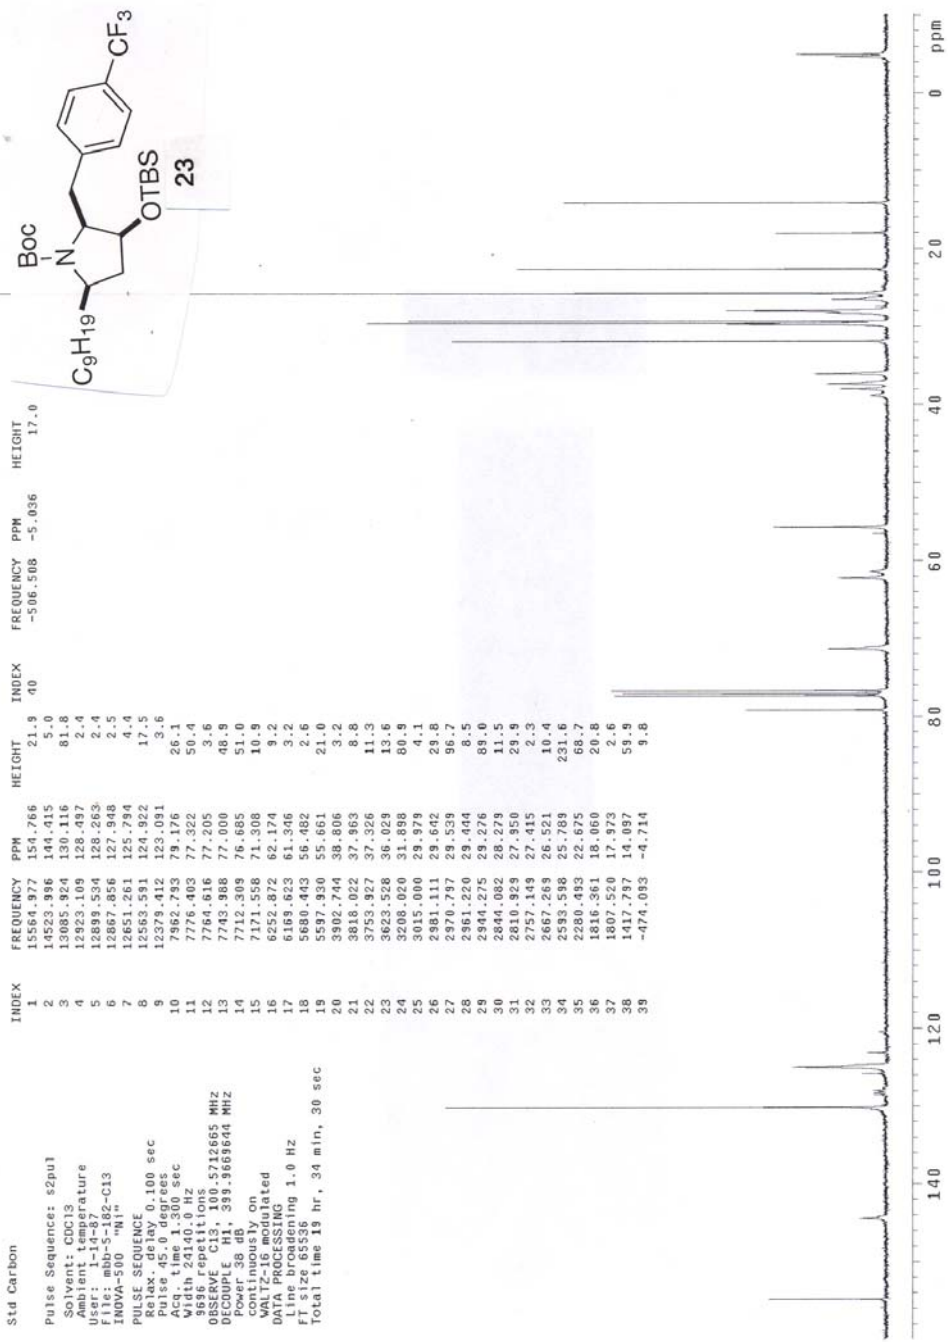

Standard proton

Pulse Sequence: s2pul  
 Solvent: CDCl3  
 Acquisition Temperature: 300.2 K  
 File: mbh-5-154-HMR-again  
 INOVA-500 "1H"  
 PULSE SEQUENCE  
 Relax. delay 0.500 sec  
 Pulse 45.0 degrees  
 Width 12.000 sec  
 Width 7988.4 Hz  
 8 repetitions  
 OBSERVE H1, 499.9042605 MHz  
 DATA PROCESSING  
 FT size 65536  
 Processing time 0.2 Hz  
 Total time 1 min, 3 sec

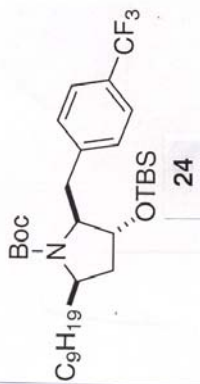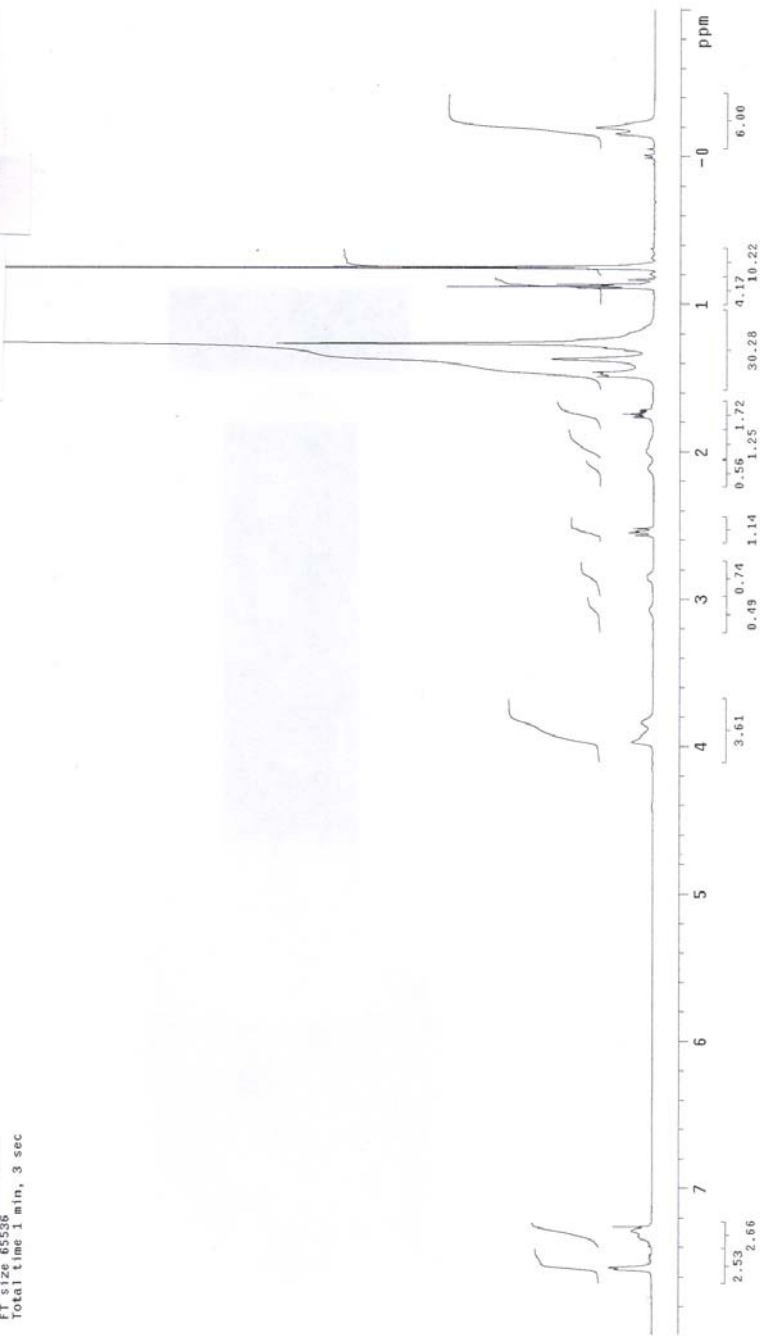





STANDARD 1H OBSERVE

Pulse Sequence: s2pu1  
 Solvent: CDCl3  
 Acquisition Date: 11/14/2003  
 File: mbb-5-174-HMR  
 INOVA-500 "1H"  
 PULSE SEQUENCE  
 Pulse 39.8 degrees  
 Acq. time 2.666 sec  
 Width 6017 Hz  
 16 repetitions  
 OBSERVE H1, 399.9649472 MHz  
 DATA PROCESSING  
 Line broadening 0.2 Hz  
 SFO 32769  
 Total time 0 min, 42 sec

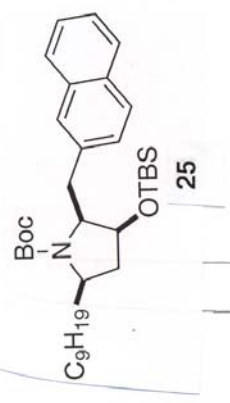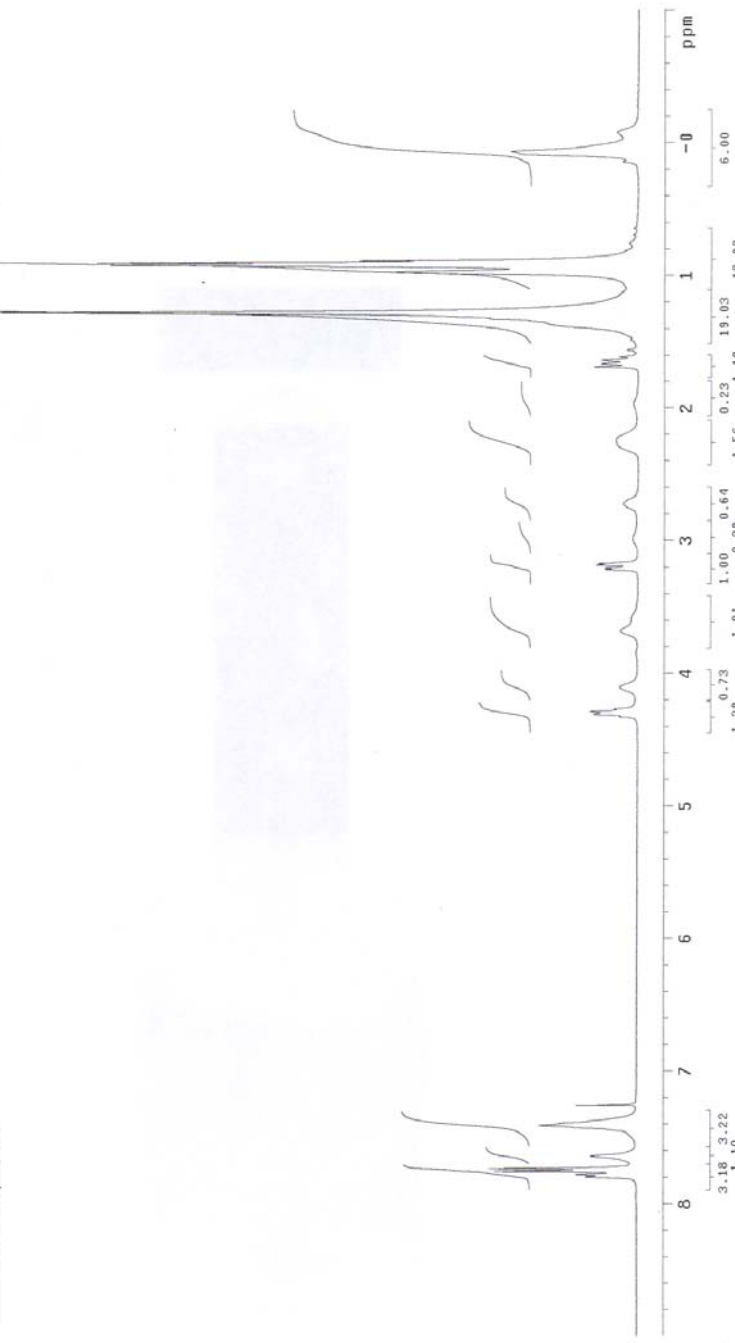

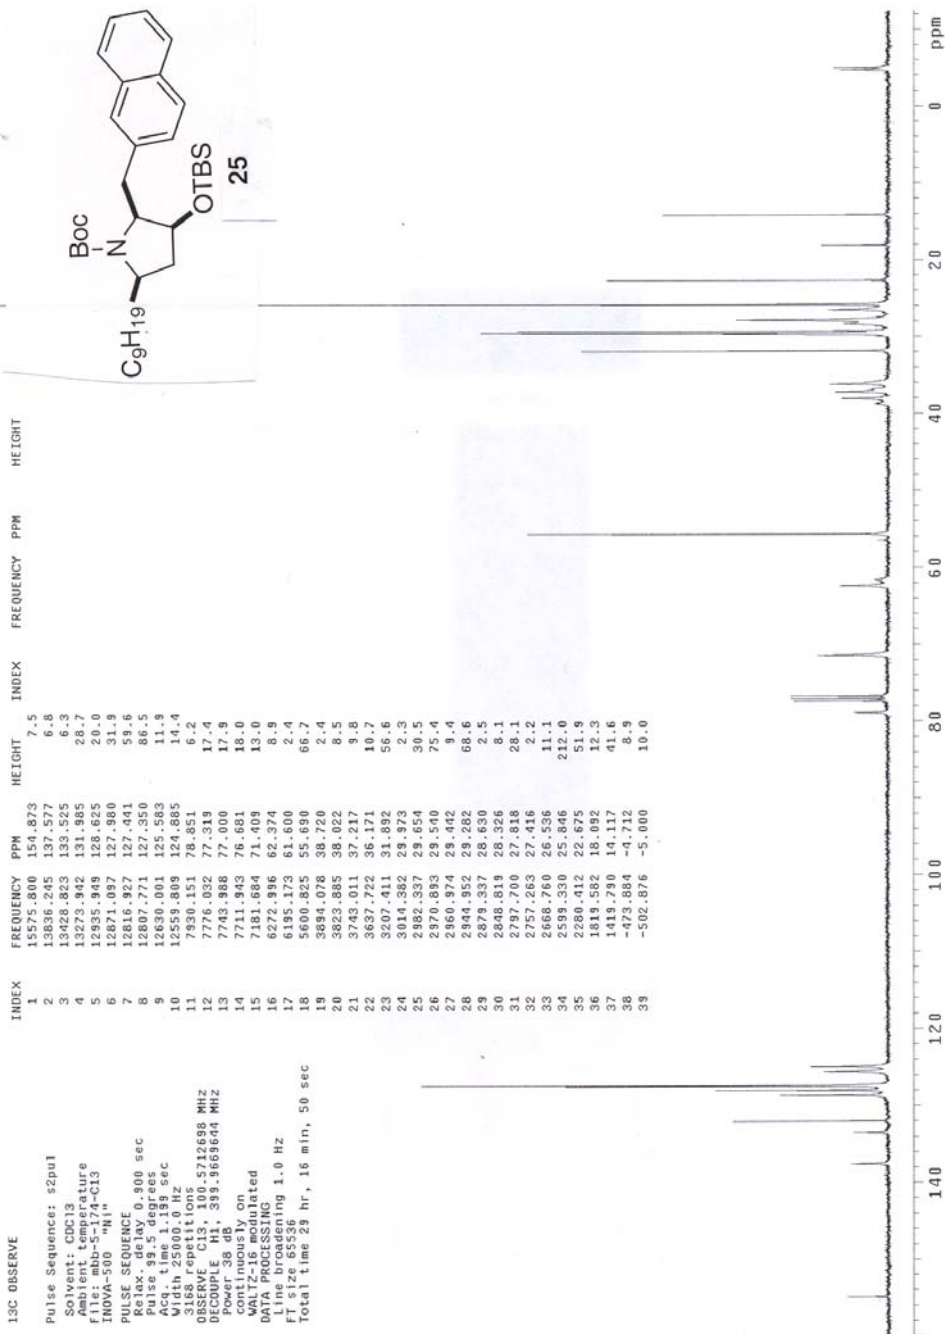

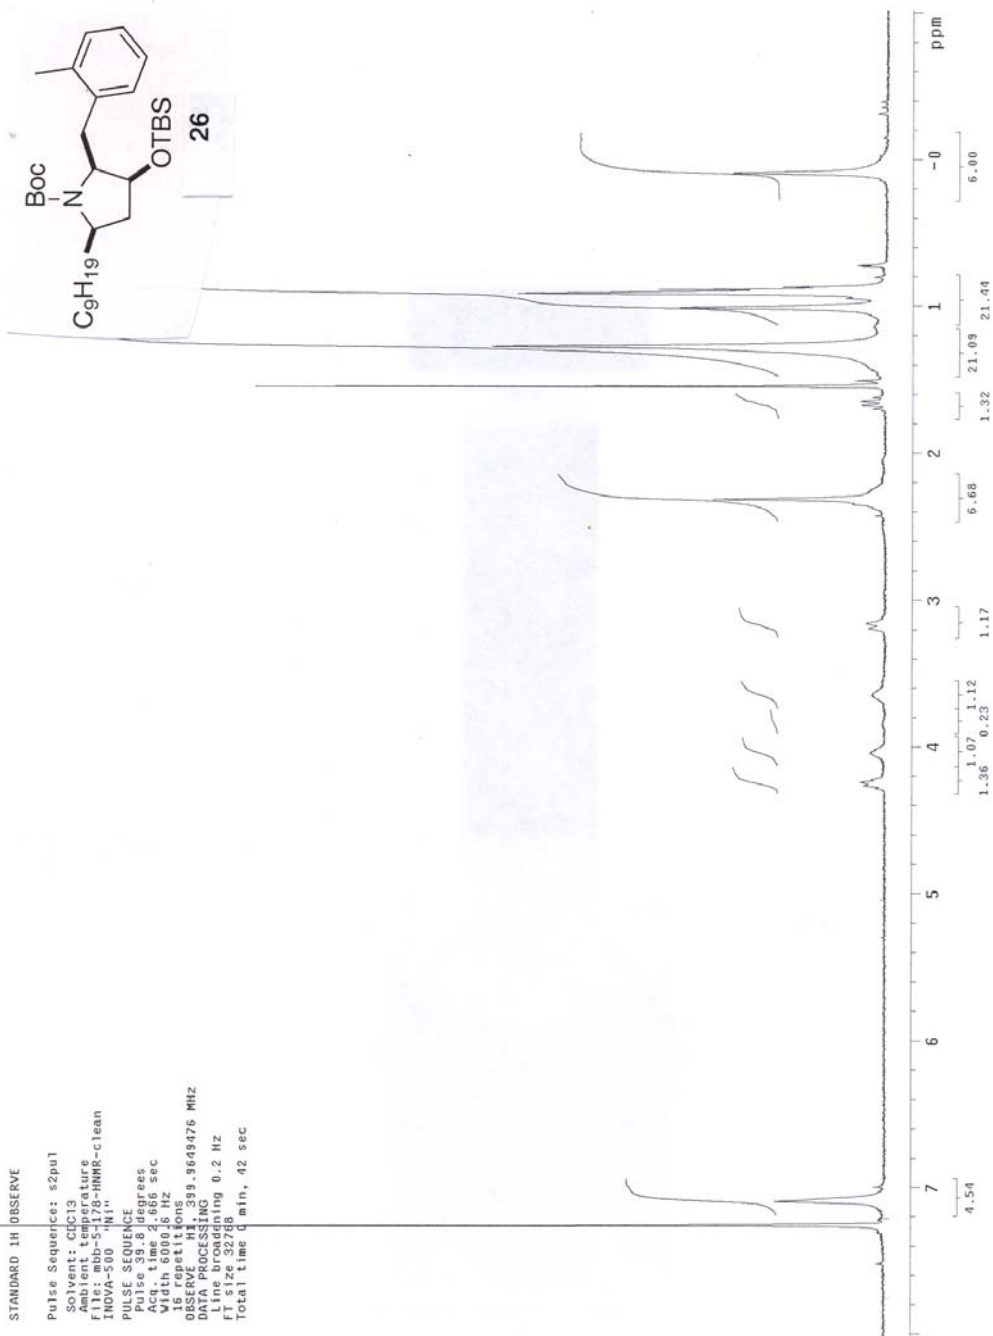



Std proton

Pulse Sequence: s2pul  
 Solvent: CDCl3  
 Ambient temperature  
 File: mbb-5-177-HNMR-again  
 INOVA-500 "H1"  
 PULSE SEQUENCE  
 Relax. delay 0.100 sec  
 Pulse 45.0 degrees  
 Acq. time 9.500 sec  
 Width 6399.5 Hz  
 16 repetitions  
 OBSERVE H1, 399.9649487 MHz  
 ULTRA PROCESSING  
 FT size 65556  
 Total time 1 min, 4 sec

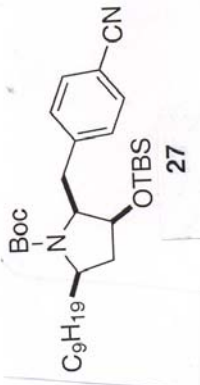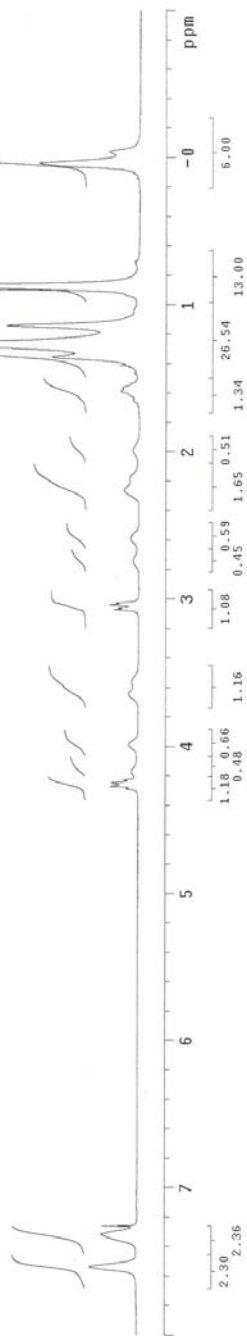

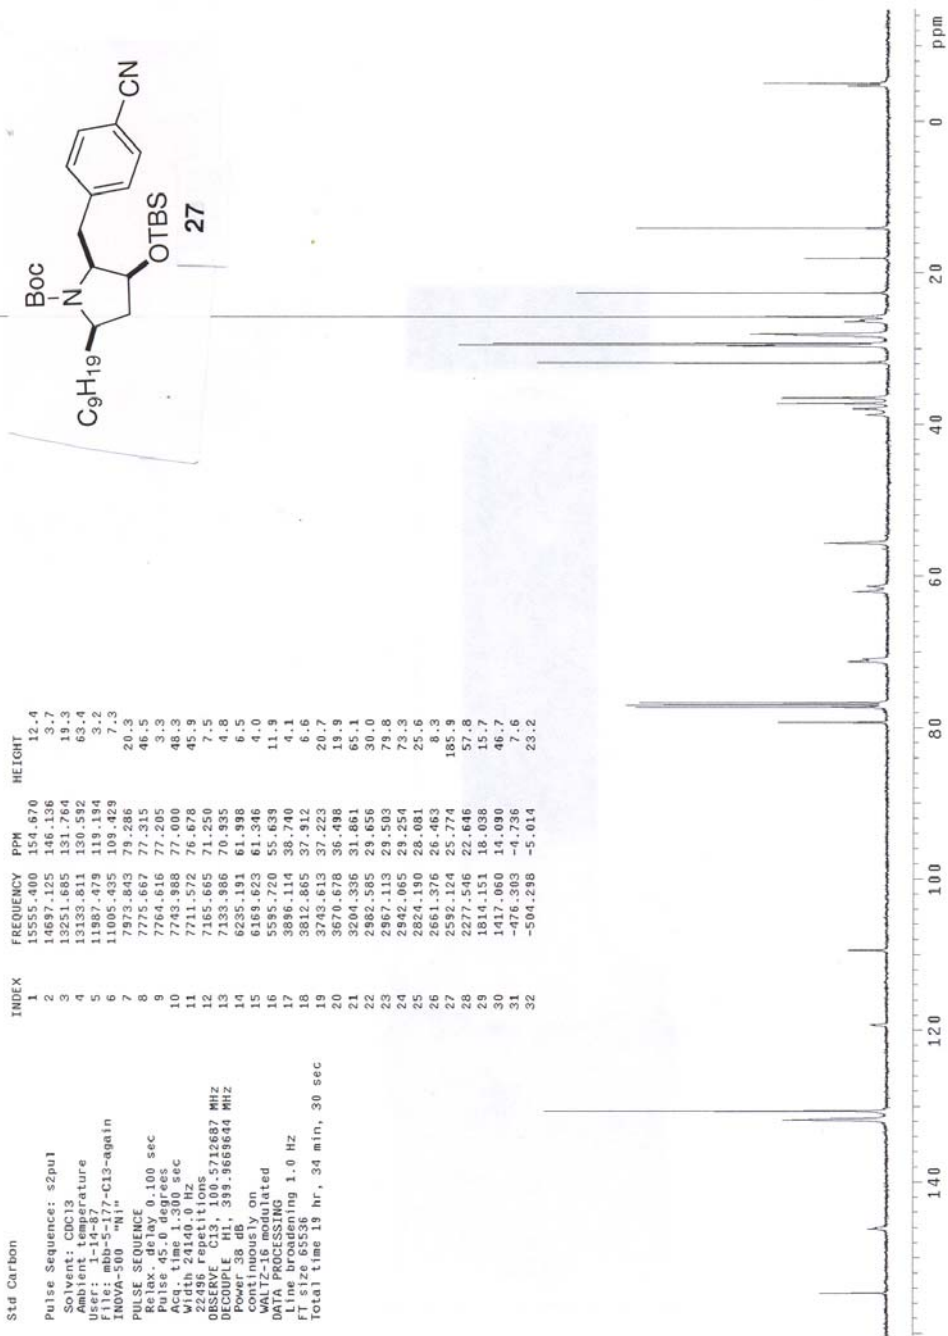





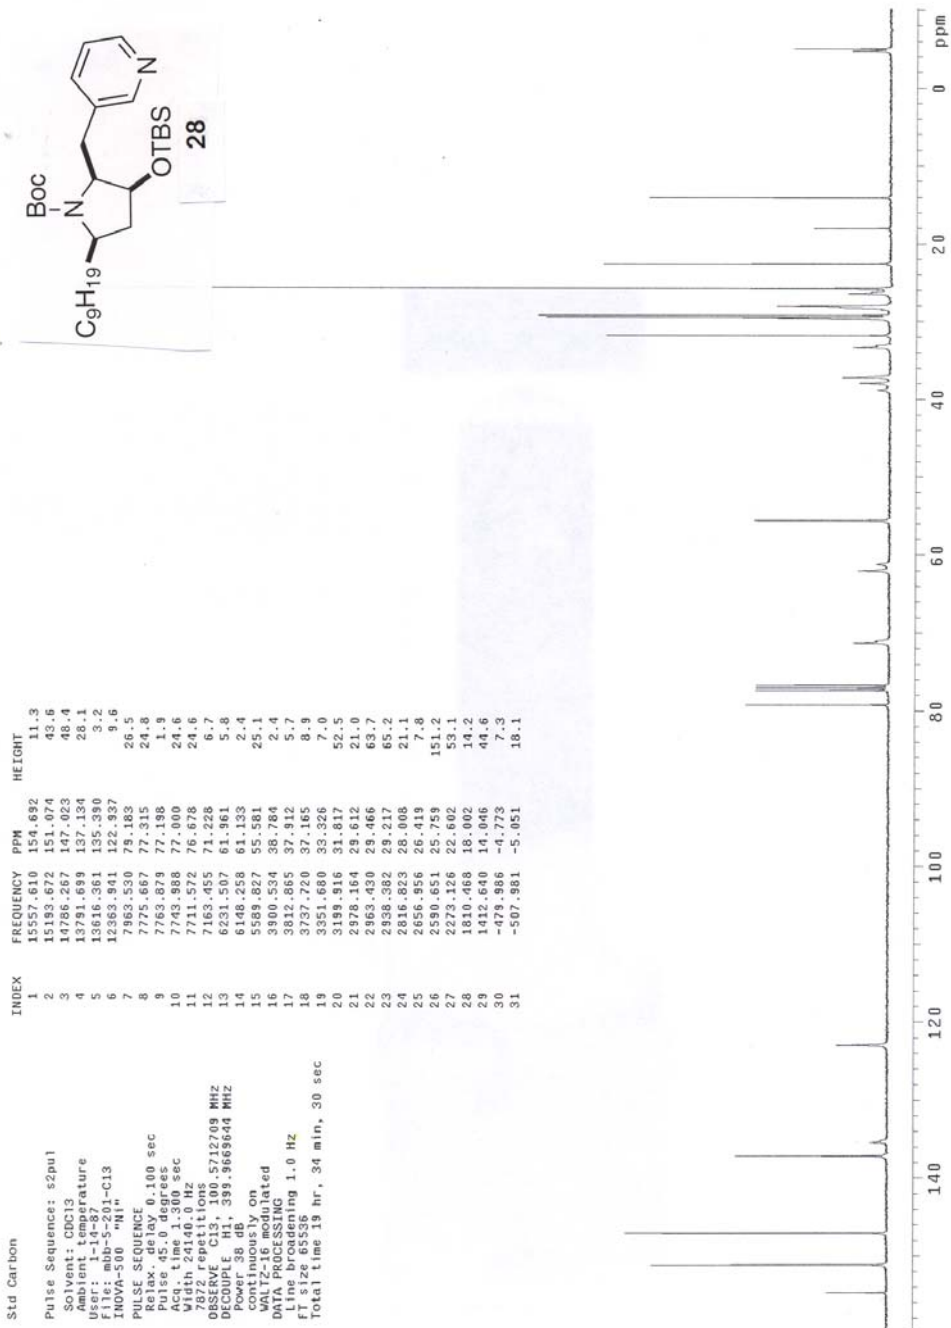

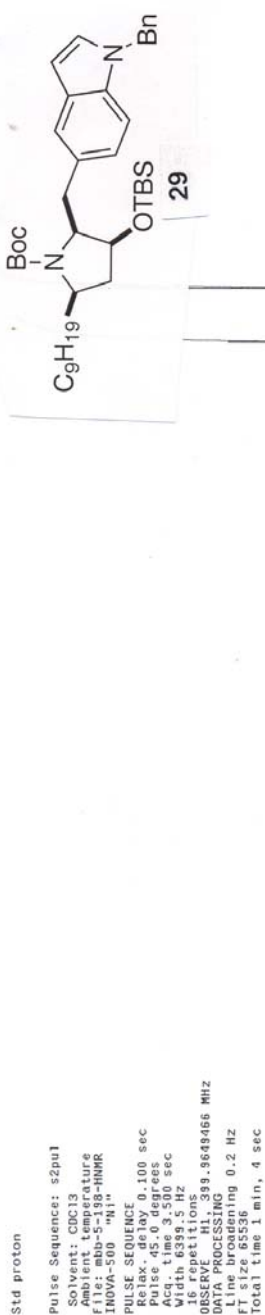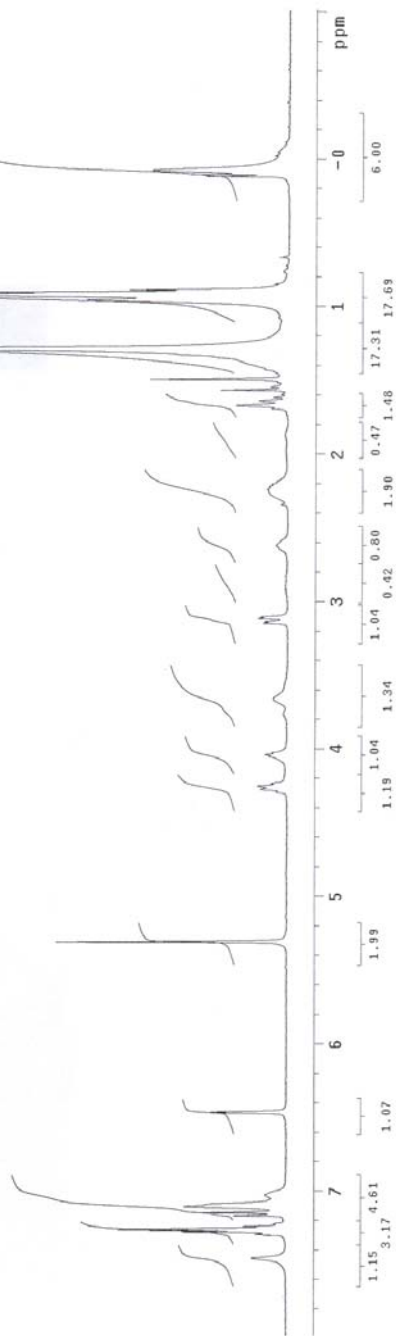

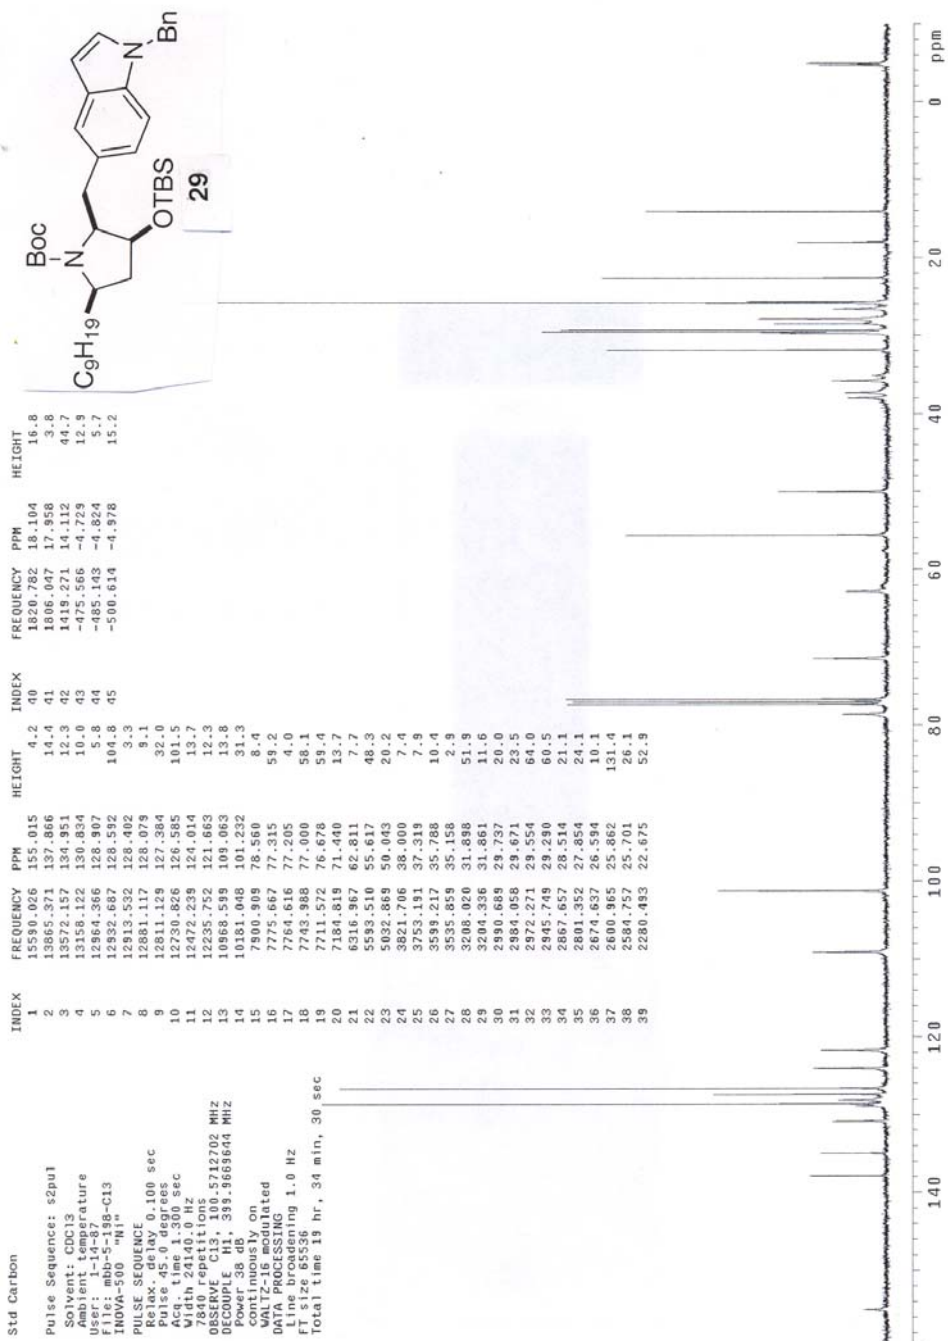

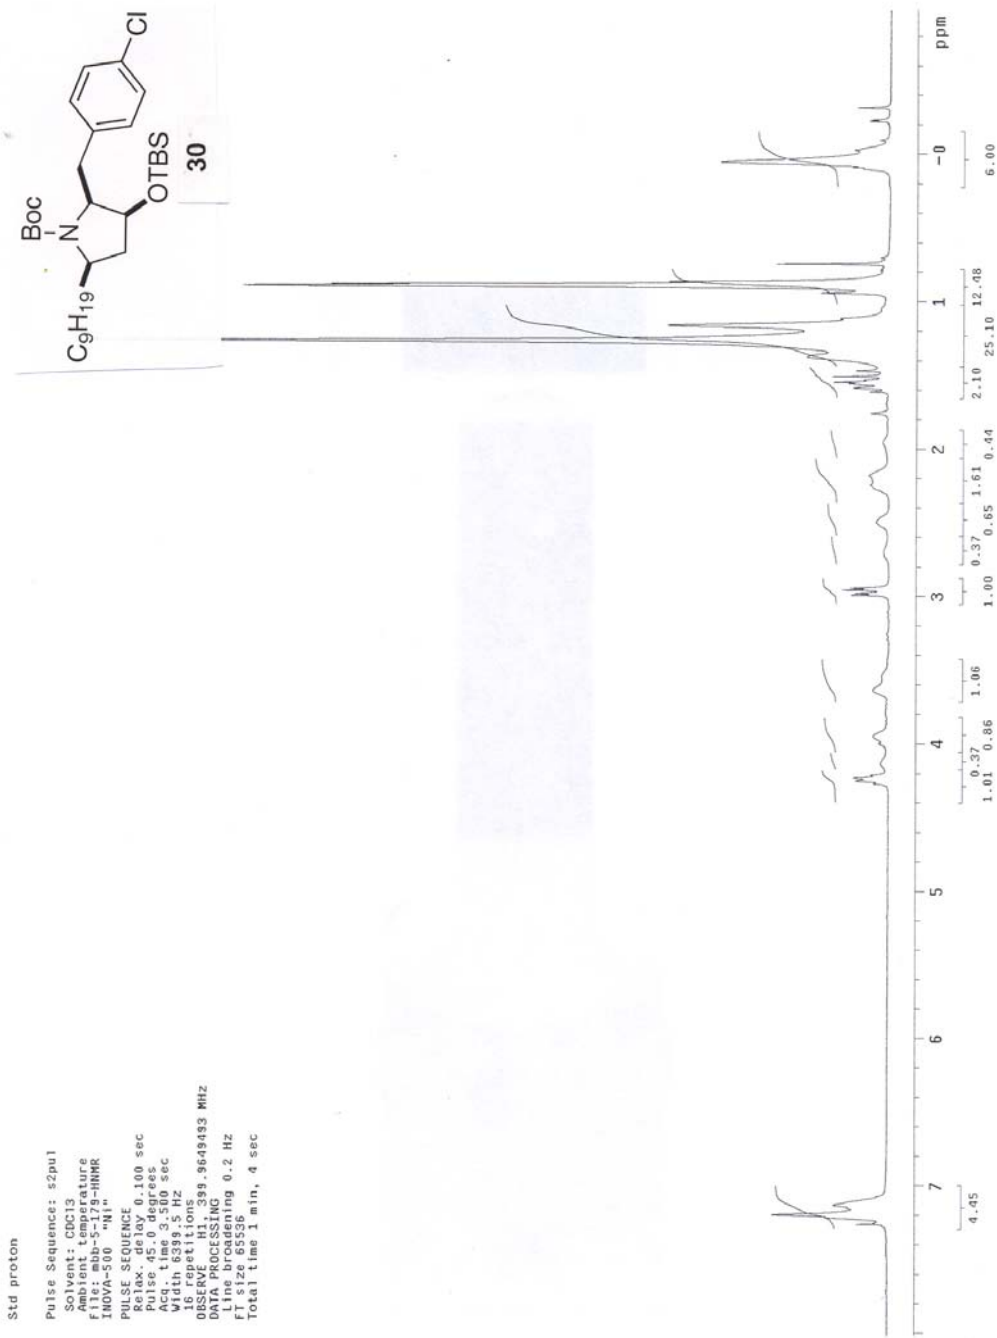

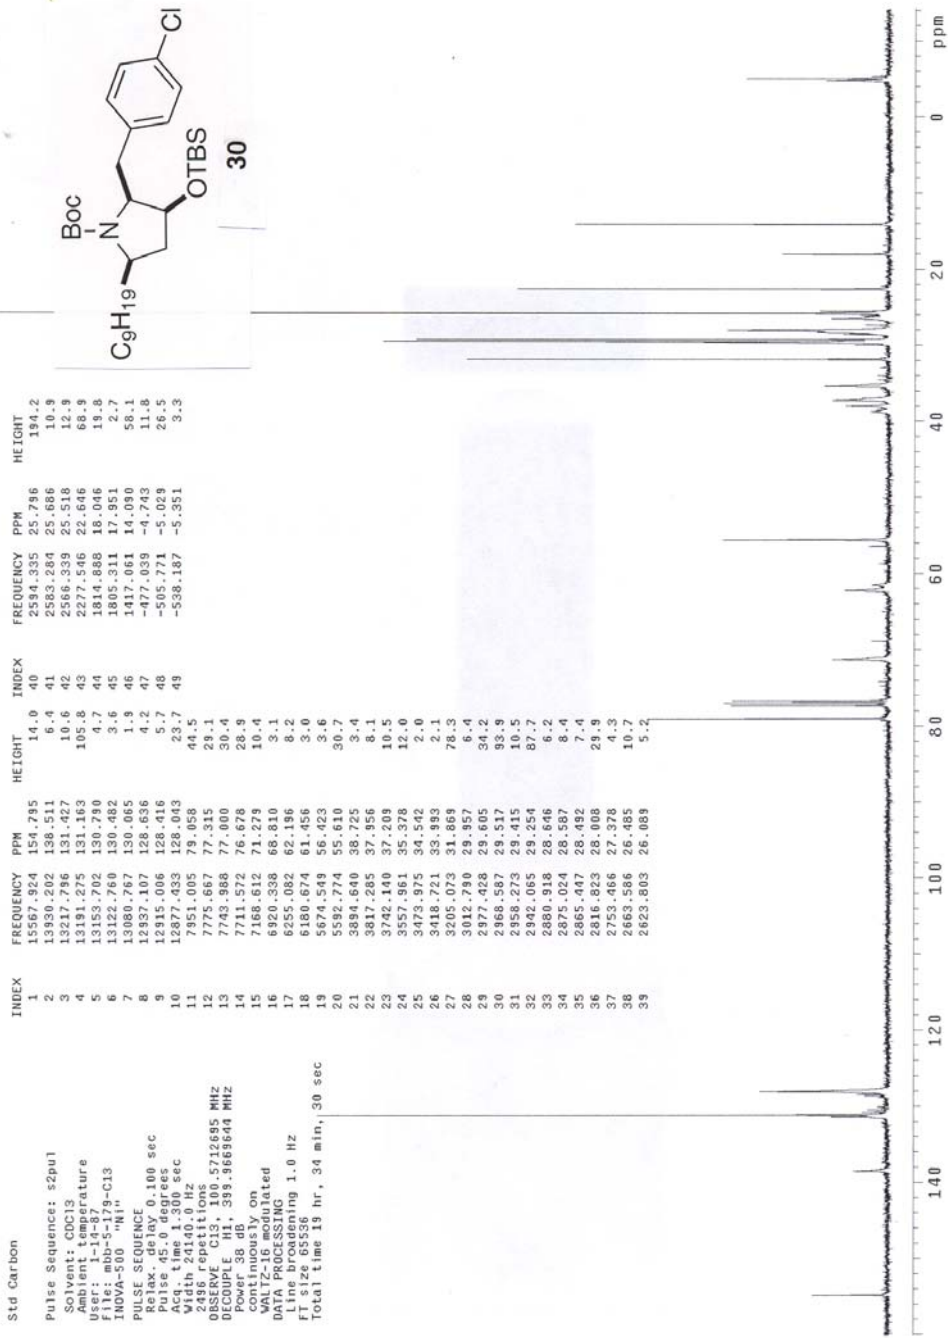

Standard proton

Pulse Sequence: s2pul  
 Solvent: CDCl3  
 Acquisition Date: 11/11/04  
 File: mbb-6-24-HMR  
 INOVA-500 "H1"  
 PULSE SEQUENCE  
 Relax. delay 0.500 sec  
 Pulse 45.0 degrees  
 Width 12.000 sec  
 Width 798.4 Hz  
 16 repetitions  
 OBSERVE H1, 499.9042603 MHz  
 DATA PROCESSING  
 FT size 65536  
 Total time 1 min, 3 sec

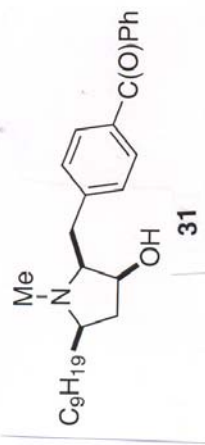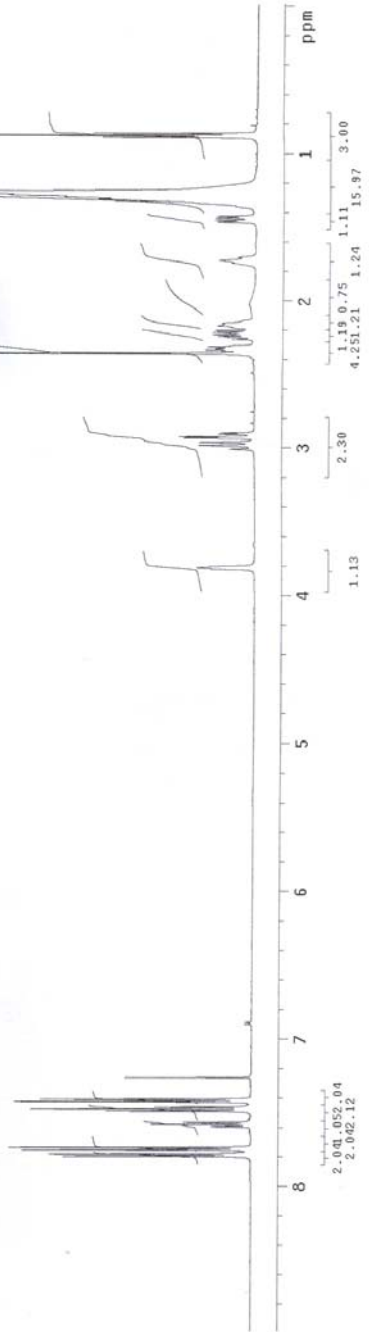

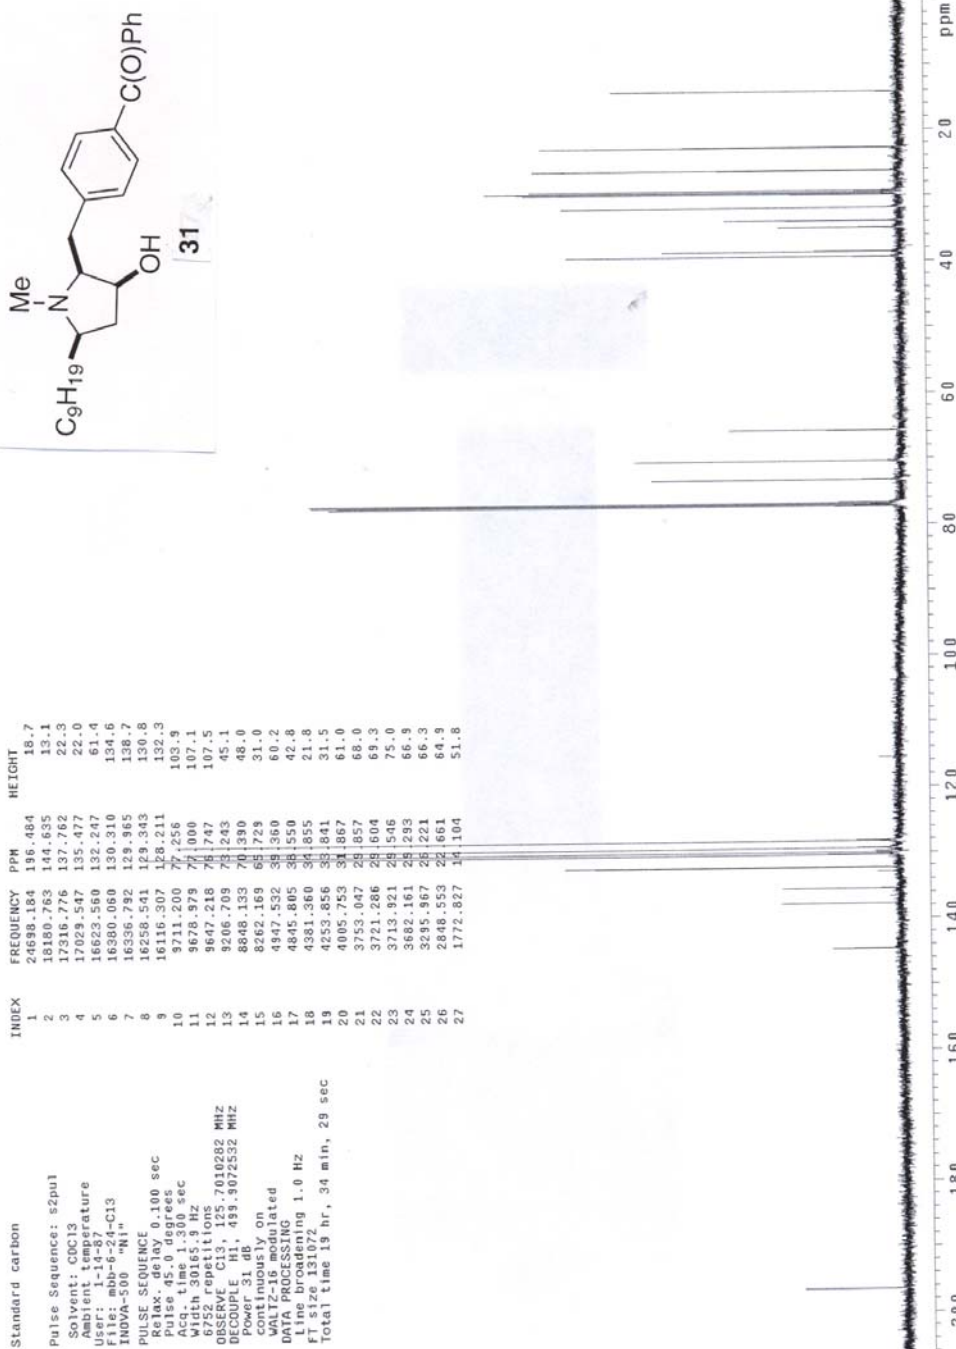

Standard proton

Pulse Sequence: s2pul  
 Solvent: CDCl3  
 Acquisition Date: 11/11/03  
 File: mbb-6-34-HMR  
 INOVA-500 "H1"  
 PULSE SEQUENCE  
 Relax. delay 0.500 sec  
 Pulse 45.0 degrees  
 Width 12.000 sec  
 Width 7988.4 Hz  
 8 repetitions  
 OBSERVE H1, 499.9042608 MHz  
 DATA PROCESSING  
 FT size 65536  
 Total time 1 min, 3 sec

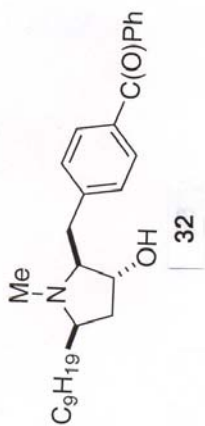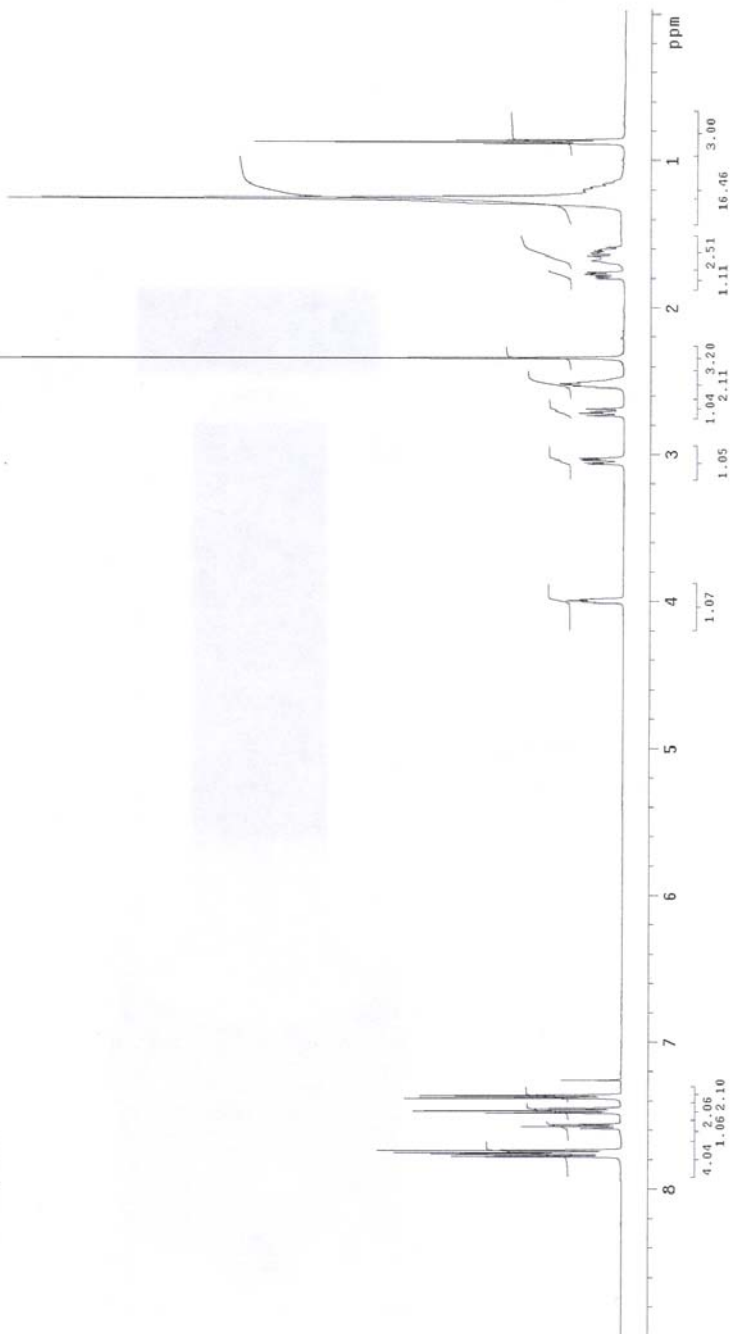



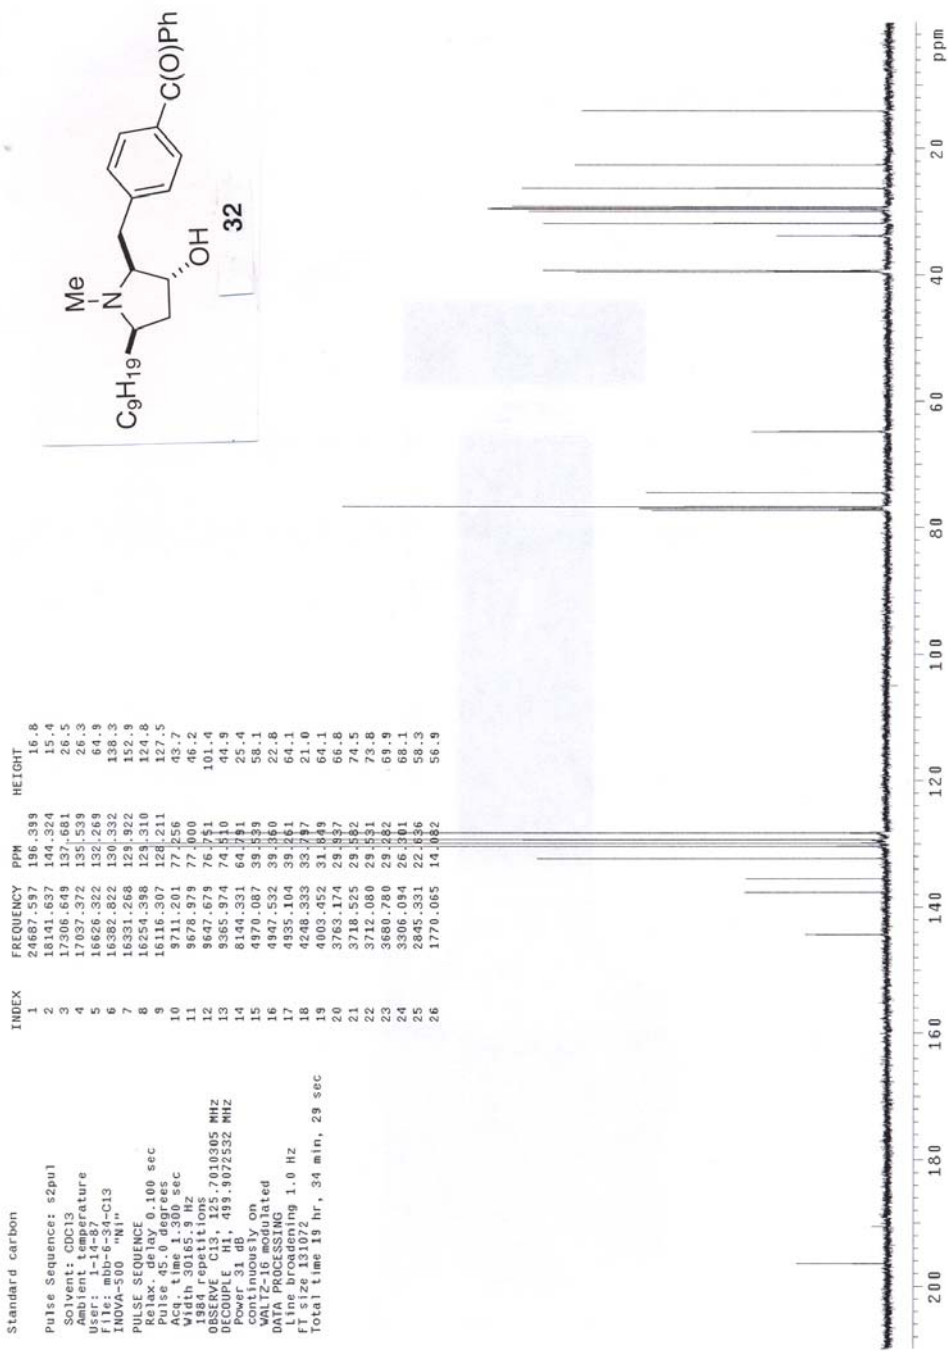

Std proton

Pulse Sequence: s2pu1  
 Solvent: CDCl3  
 Acquisition Date: 11/11/03  
 File: mbb-6-2-co-fl  
 INOVA-500 "1H"  
 PULSE SEQUENCE  
 Relax. delay 0.100 sec  
 Pulse 45.0 degrees  
 Acq. time 0.080 sec  
 Width 6399.5 Hz  
 16 repetitions  
 OBSERVE H1, 399.3649489 MHz  
 DATA PROCESSING  
 FT size 65536  
 Processing time 0.2 Hz  
 Total time 1 min, 4 sec

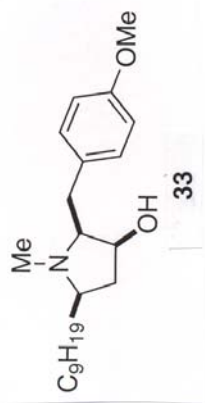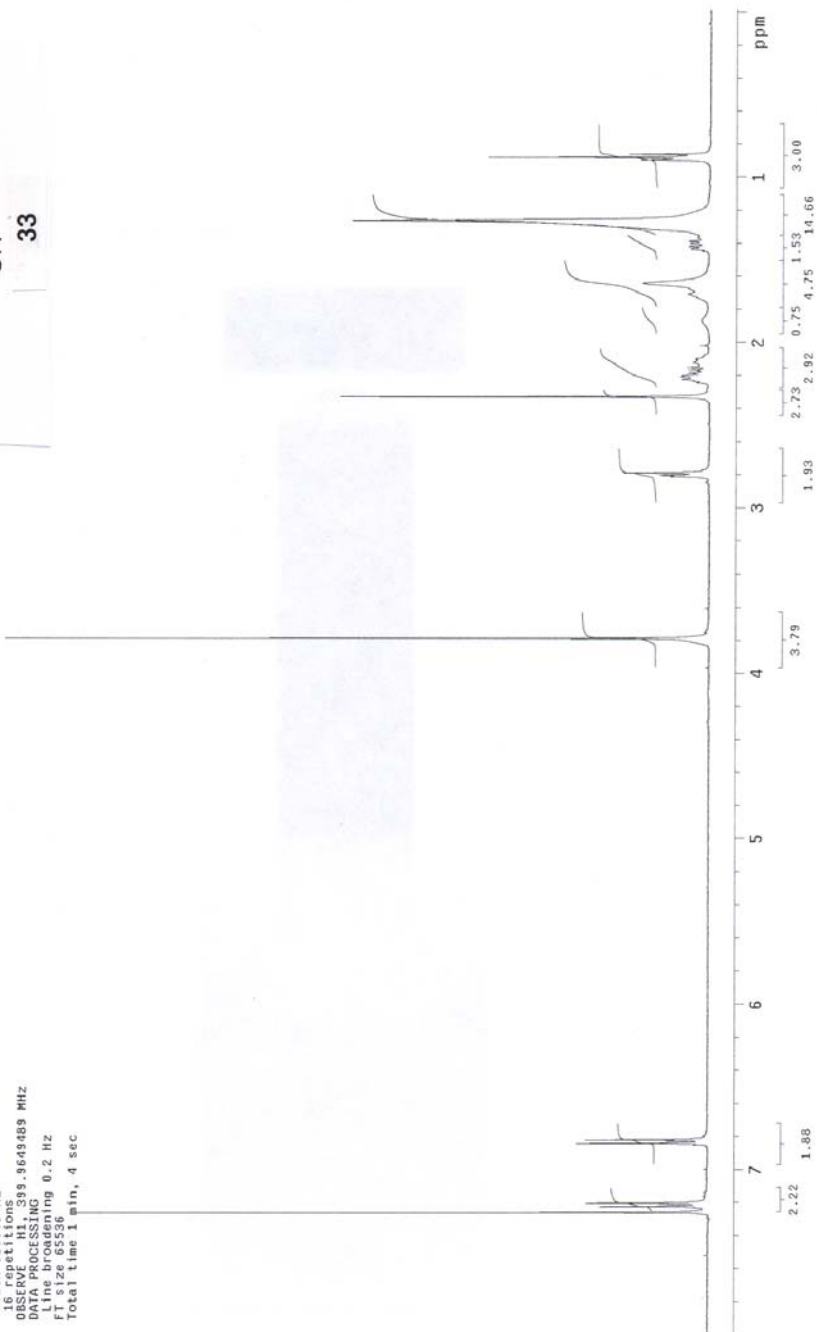

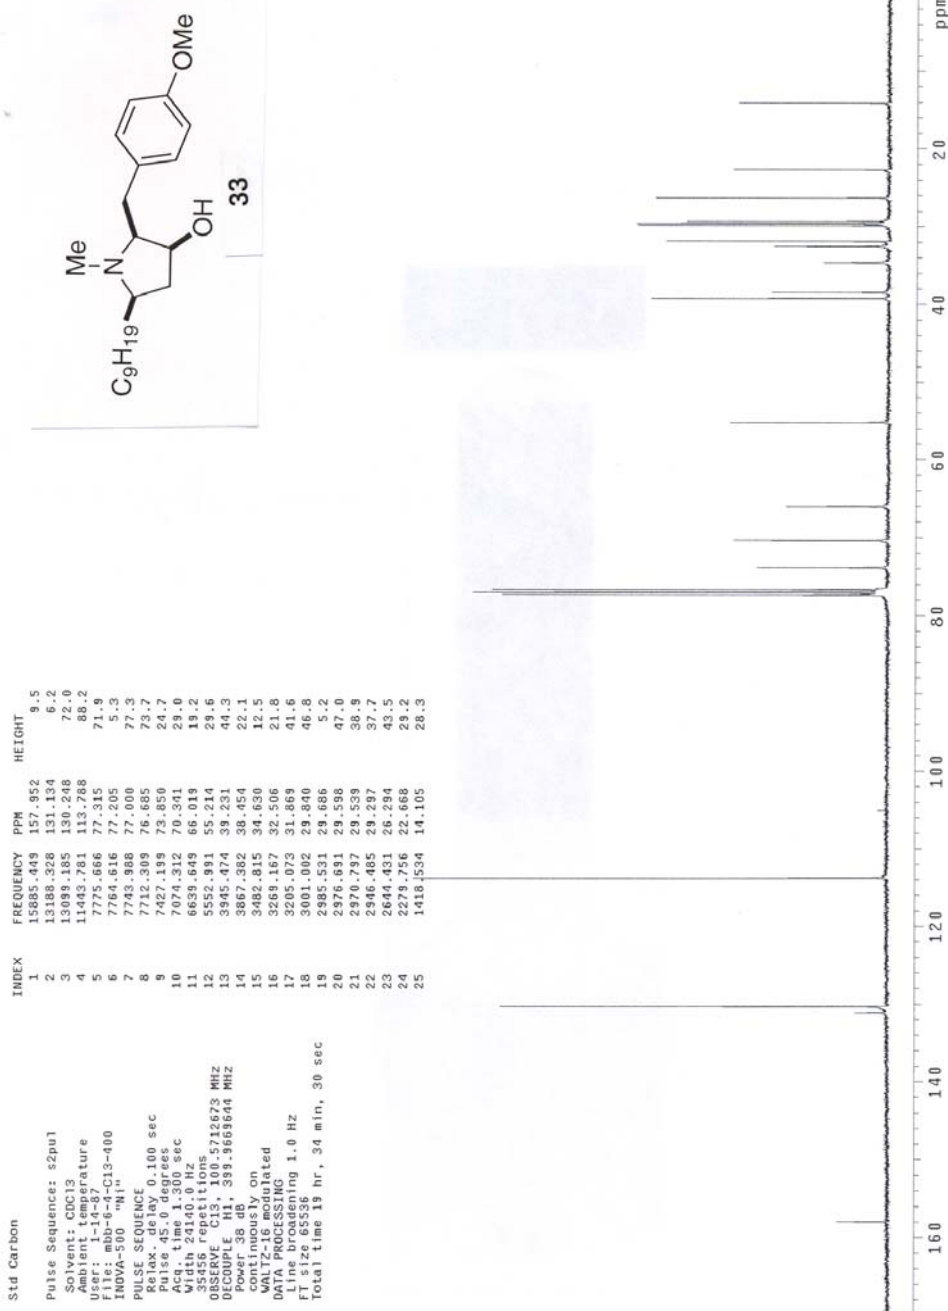

Std Carbon

Pulse Sequence: s2pu1  
 Solvent: CDCl3  
 User: j-14-87  
 File: mbb-6-4-C13-400  
 INOVA-500 "N1"

PULSE SEQUENCE  
 Relax. delay 0.100 sec  
 Pulse prog zgpg30  
 Acq time 1.300 sec  
 Width 24140.0 Hz  
 35456 repetitions  
 OBSERVE C13, 100.5712673 MHz  
 POWER S8 dB  
 continuously on  
 WALTZ-16 modulated  
 DATA PROCESSING  
 FT size 65536  
 Total time 19 hr, 34 min, 30 sec

Standard proton

Pulse Sequence: s2pul  
 Solvent: CDCl3  
 Acquisition Temperature:  
 File: mbb-6-16-co-f86-90-HMR  
 INOVA-500 "1H"  
 PULSE SEQUENCE  
 Relax. delay 0.500 sec  
 Pulse, 45.0 degrees  
 Width 3.00 sec  
 Width 798.4 Hz  
 16 repetitions  
 OBSERVE H1, 499.9042608 MHz  
 DATA PROCESSING  
 Length 0.2 Hz  
 FT size 65536  
 Total time 1 min, 3 sec

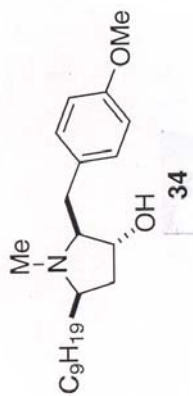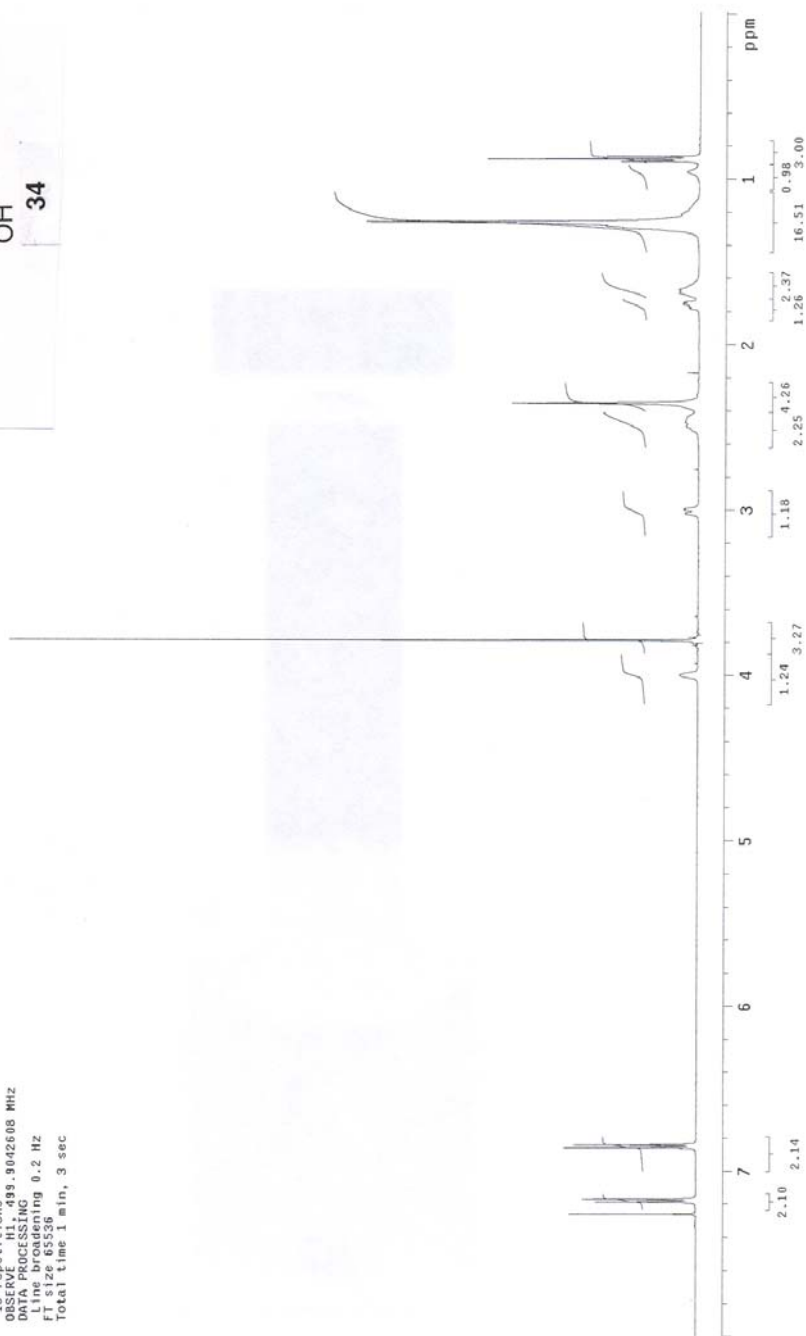

Standard carbon

Pulse Sequence: s2pul

Solvent: CDCl3

Shimadzu

User: mmi-14-85/rature

File: mbb-6-16-C13-500

INOVA-500 "N1"

PULSE SEQUENCE

Relax. delay 0.100 sec

Use 0.300 sec

Acq. time 1.300 sec

Width 30165.9 Hz

25920 repetitions

DESCRIBE C13, 125.7010273 MHz

Power 31 dB

continuously on

WALTZ-16 modulated

DATA PROCESSING

Time averaging 1.0 Hz

FT size 131072

Total time 19 hr, 34 min, 29 sec

| INDEX | FREQUENCY PPM | HEIGHT  |
|-------|---------------|---------|
| 1     | 19878.056     | 158.122 |
| 2     | 16434.836     | 130.745 |
| 3     | 16362.108     | 130.167 |
| 4     | 14335.387     | 114.044 |
| 5     | 9711.200      | 77.256  |
| 6     | 9678.979      | 77.000  |
| 7     | 9647.218      | 76.747  |
| 8     | 9397.734      | 74.763  |
| 9     | 8162.283      | 64.934  |
| 10    | 6941.101      | 55.219  |
| 11    | 4812.549      | 39.081  |
| 12    | 4805.184      | 39.023  |
| 13    | 4821.409      | 38.356  |
| 14    | 4255.237      | 33.852  |
| 15    | 4007.134      | 31.878  |
| 16    | 3765.015      | 29.952  |
| 17    | 3720.366      | 29.597  |
| 18    | 3714.842      | 29.553  |
| 19    | 3684.922      | 29.315  |
| 20    | 3317.141      | 26.389  |
| 21    | 2849.474      | 22.669  |
| 22    | 1773.747      | 14.111  |

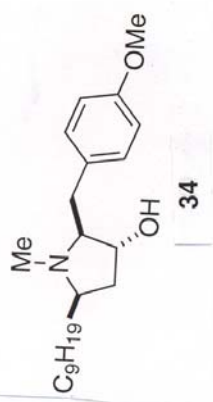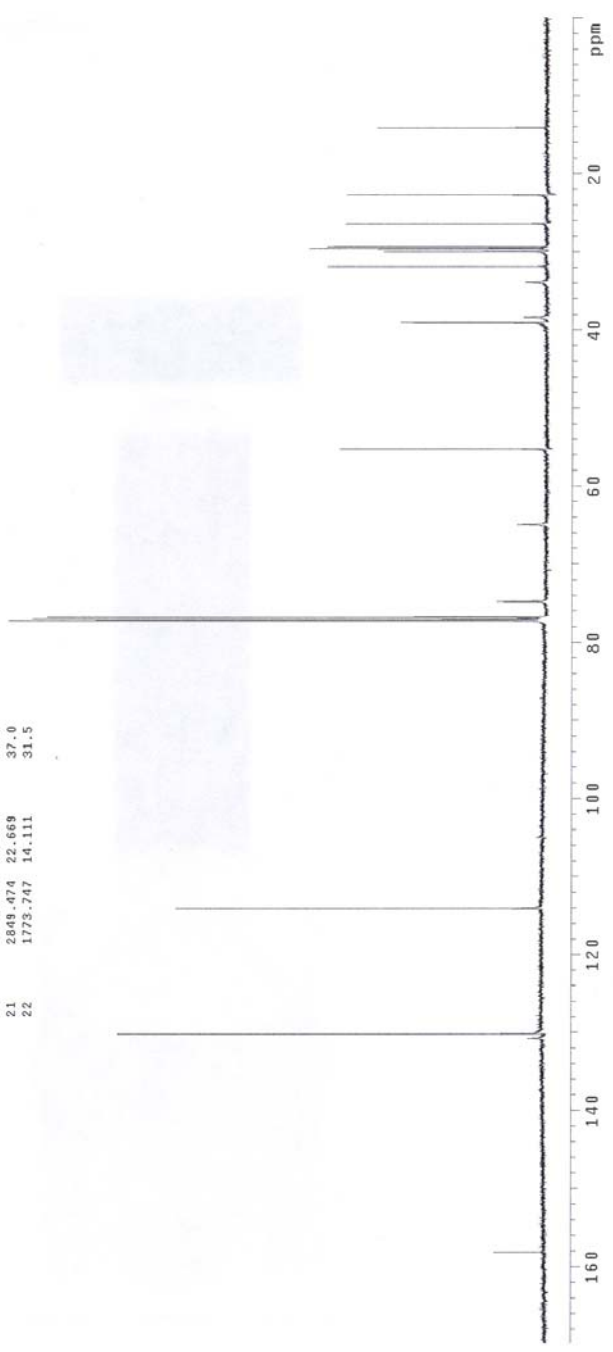

Standard proton

Pulse Sequence: s2pu1  
 Solvent: CDCl3  
 Acquisition Temperature: 300.2 K  
 File: mbb-6-35-HMR  
 INOVA-500 "1H"  
 PULSE SEQUENCE  
 Relax. delay 0.500 sec  
 Pulse 45.0 degrees  
 Acq. time 0.00 sec  
 Width 7998.4 Hz  
 8 repetitions  
 OBSERVE H1, 499.9042608 MHz  
 DATA PROCESSING  
 FT size 65536  
 Total time 1 min, 3 sec

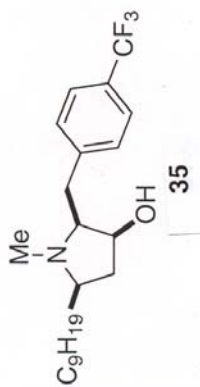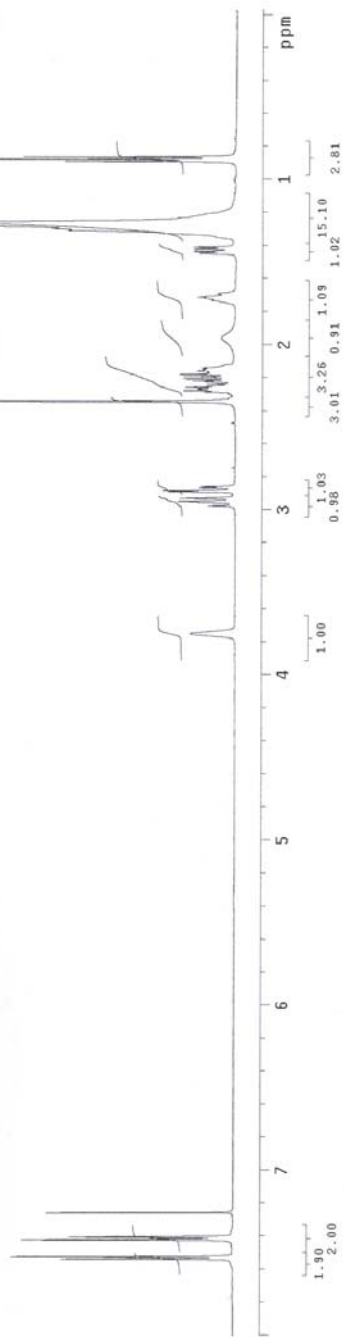

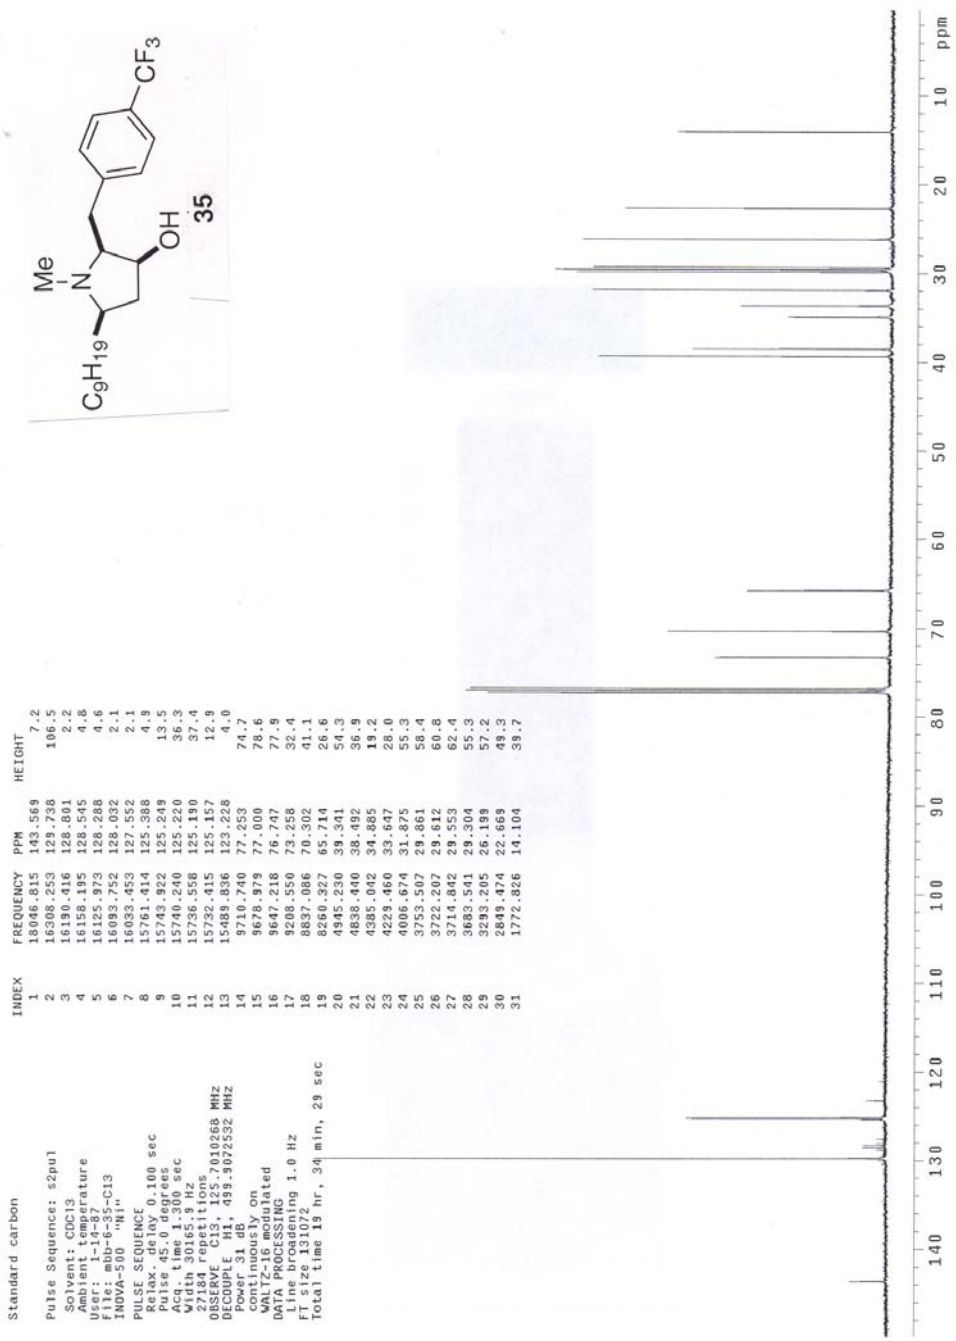

Std proton

Pulse Sequence: s2p01  
 Solvent: CDCl3  
 Absorbance: 0.100  
 File: mbb-6-38-HNMR  
 INOVA-500 "H1"  
 PULSE SEQUENCE  
 Relax. delay 0.100 sec  
 Pulse MS 9 degrees  
 Width 6399.5 Hz  
 16 repetitions  
 OBSERVE H1, 399.9649489 MHz  
 DATA PROCESSING  
 FT size 65556  
 Total time 1 min, 4 sec

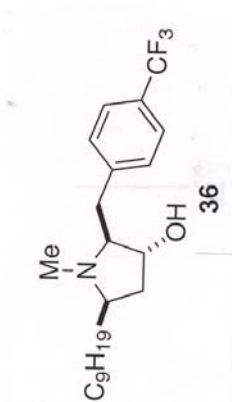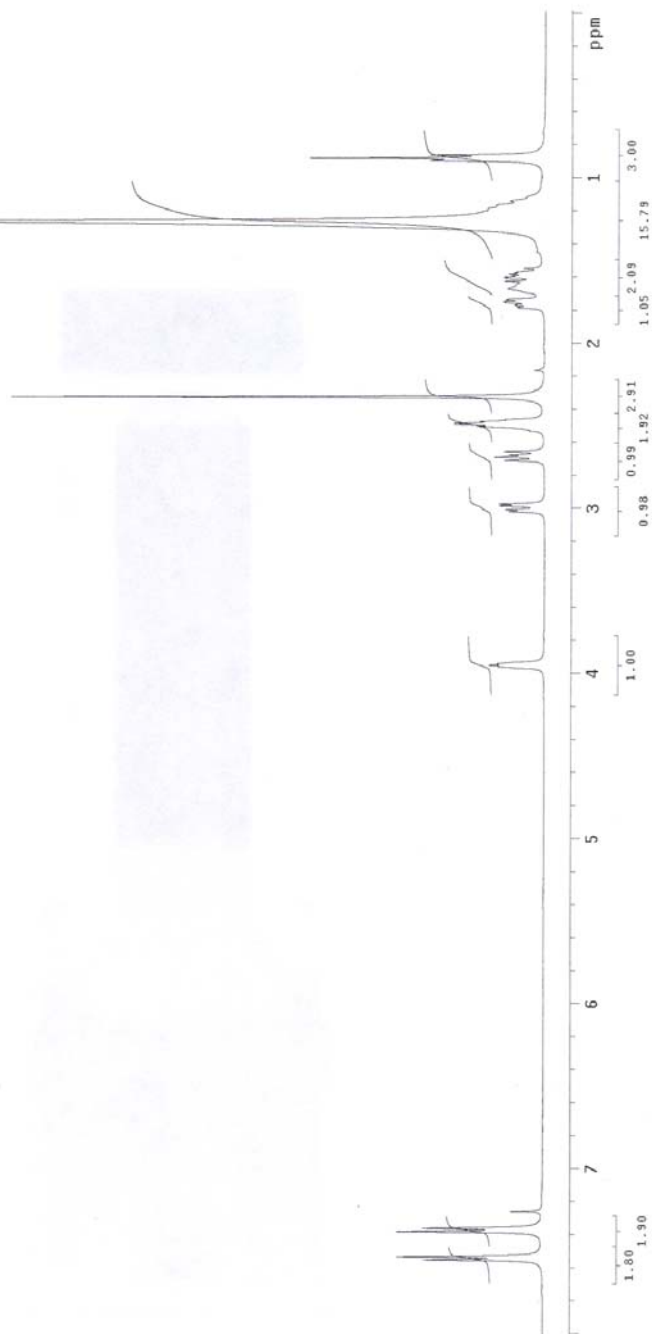



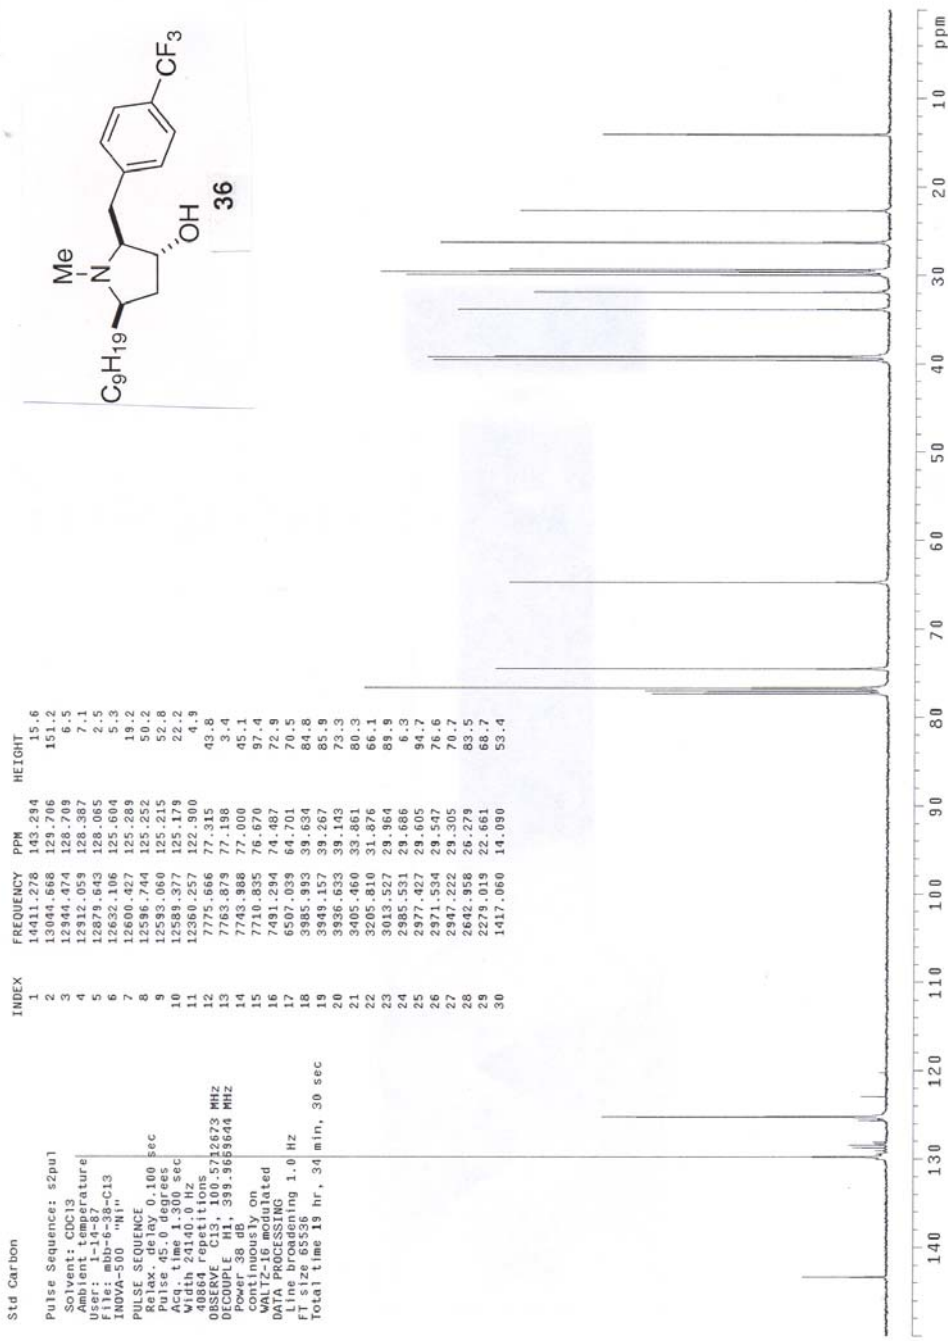

Data: C:\CLASS-VP\Enterprise\Projects\Default\Data\Bertrand Data\HPLC.10003  
03-07-2006 02-04-44 PM.dat

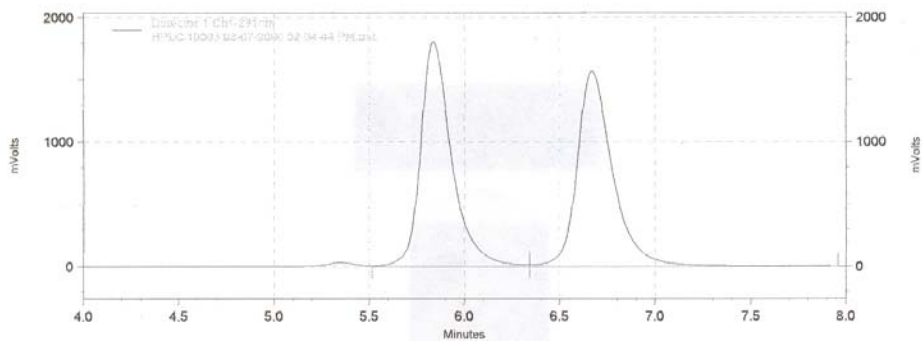

Detector 1 Ch1-231nm  
Results

| Retention Time | Area            | Area Percent   |
|----------------|-----------------|----------------|
| 5.833          | 20480115        | 50.294         |
| 6.667          | 20241074        | 49.706         |
| <b>Totals</b>  | <b>40721189</b> | <b>100.000</b> |

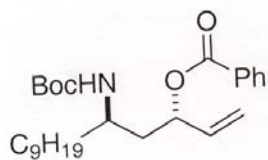

Derivative of racemic **9**

HPLC trace (231 nm)  
Chiral column (R,R) WHELK-O (Regis Tech.)  
Solvent system= 5 % isopropanol/hexanes  
Flow rate = 1 mL/min

Data: C:\CLASS-VP\Enterprise\Projects\Default\Data\Bertrand Data\HPLC.10003  
03-07-2006 12:59:50 PM.dat

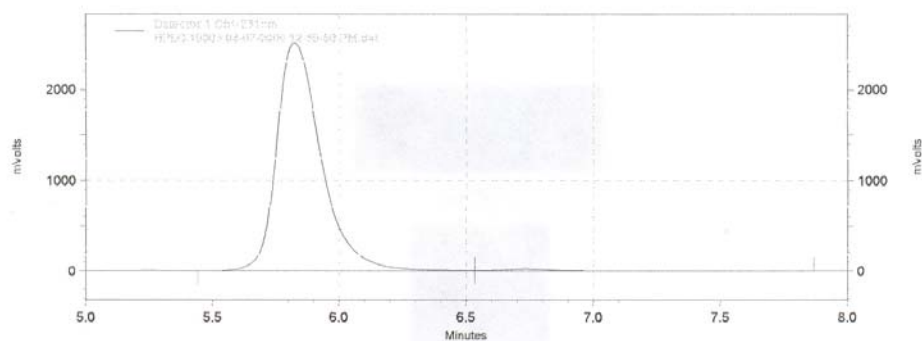

Detector 1 Ch1-231nm  
Results

| Retention Time | Area            | Area Percent   |
|----------------|-----------------|----------------|
| 5.825          | 30882444        | 98.595         |
| 6.733          | 440201          | 1.405          |
| <b>Totals</b>  | <b>31322645</b> | <b>100.000</b> |

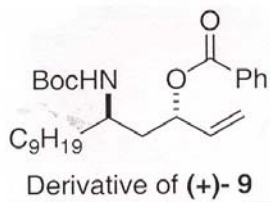

HPLC trace (231 nm)  
Chiral column (R,R) WHELK-O (Regis Tech.)  
Solvent system= 5 % isopropanol/hexanes  
Flow rate = 1 mL/min

Data: C:\CLASS-VP\Enterprise\Projects\Default\Data\Bertrand Data\HPLC.10003  
03-14-2006 10:57:46 AM.dat

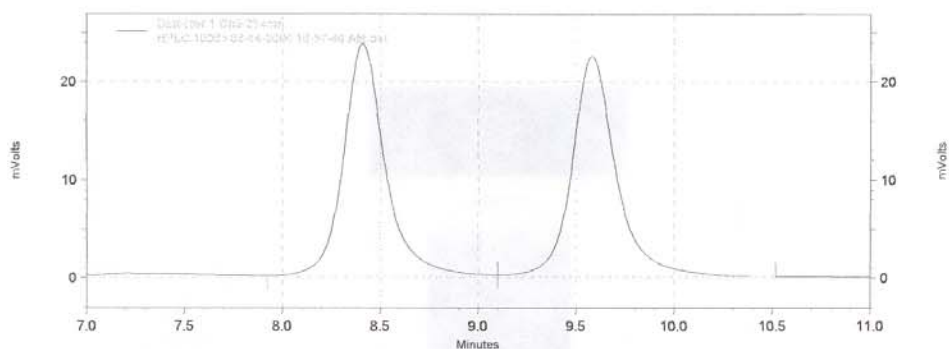

Detector 1 Ch2-254nm  
Results

| Retention Time | Area          | Area Percent   |
|----------------|---------------|----------------|
| 8.408          | 355240        | 50.115         |
| 9.575          | 353609        | 49.885         |
| <b>Totals</b>  | <b>708849</b> | <b>100.000</b> |

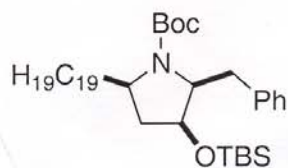

Racemic 11

HPLC trace (254 nm)  
Chiral column (R,R) WHELK-O (Regis Tech.)  
Solvent system= 2.5 % isopropanol/hexanes  
Flow rate = 0.5 mL/min

Data: C:\CLASS-VP\Enterprise\Projects\Default\Data\Bertrand Data\HPLC.10003  
03-14-2006 11-26-36 AM.dat

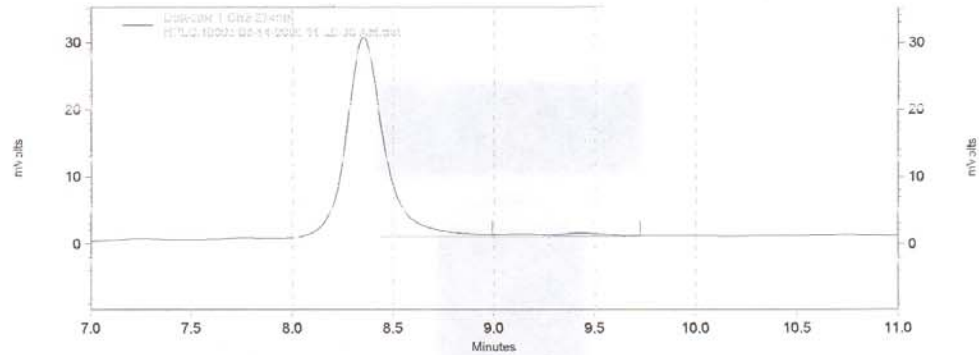

Detector 1 Ch2-254nm  
Results

| Retention Time | Area          | Area Percent   |
|----------------|---------------|----------------|
| 8.350          | 391868        | 98.086         |
| 9.433          | 7648          | 1.914          |
| <b>Totals</b>  | <b>399516</b> | <b>100.000</b> |

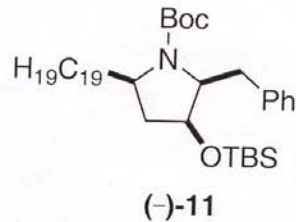

HPLC trace (254 nm)  
Chiral column (R,R) WHELK-O (Regis Tech.)  
Solvent system= 2.5 % isopropanol/hexanes  
Flow rate = 0.5 mL/min
